# Supplementary material for: Short communication: Experimental factors affecting fission-track counts in apatite
Source: Copernicus journal article supplement (doi:10.5194/gchron-4-109-2022), 2022-02-23
Supplement: Supplementary file 1 [file gchron-4-109-2022-supplement.zip]

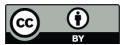

*Supplement of*

## **Short communication: Experimental factors affecting fission-track counts in apatite**

**Carolyn Aslanian et al.**

*Correspondence to:* Carolyn Aslanian ([carolin.aslanian@geo.tu-freiberg.de](mailto:carolin.aslanian@geo.tu-freiberg.de))

- [gchron-4-109-2022-supplement-title-page.pdf](#)
- [GC 2021-28 Supplement 1 without Title.pdf](#)
- [GC 2021-28 Supplement 2.pdf](#)

The copyright of individual parts of the supplement might differ from the article licence.
