# Supplementary material for: Short communication: Experimental factors affecting fission-track counts in apatite
Source: Copernicus journal article supplement (doi:10.5194/gchron-4-109-2022), 2022-02-23
Supplement: Supplementary file 3 [file gchron-4-109-2022-supplement.zip]

Archive with 3 entries (3 files):
- GC 2021-28 Supplement 2.pdf
- gchron-4-109-2022-supplement-title-page.pdf
- GC 2021-28 Supplement 1 without Title.pdf
