# Supplementary material for: Short communication: Experimental factors affecting fission-track counts in apatite
Source: Copernicus journal article supplement (doi:10.5194/gchron-4-109-2022), 2022-02-23
Supplement: Supplementary file 3 [file gchron-4-109-2022-supplement.zip › GC 2021-28 Supplement 2.pdf]

| DEMING                 | $\lambda$ | Intcpt. | Slope |
|------------------------|-----------|---------|-------|
| Y   X                  | 0.00      | 7.98    | 0.78  |
| X   Y                  | 1000      | -0.87   | 0.93  |
| ORT.                   | 1.00      | 2.25    | 0.90  |
| GMR                    | 1.19      | 1.59    | 0.92  |
| Tracks                 |           | 1824    | 1732  |
| Fields                 |           | 39.0    | 39.0  |
| Means                  |           | 46.8    | 44.4  |
| Variances              |           | 49.3    | 41.4  |
| S.Deviation            |           | 7.02    | 6.43  |
| SD/SD <sub>POISS</sub> |           | 1.12    | 1.03  |
| Covariance             |           | 38.4    |       |
| P( $\chi^2$ )          |           | 1.00    |       |
| Correl                 |           | 0.87    |       |
| MSWD                   |           | 0.23    |       |

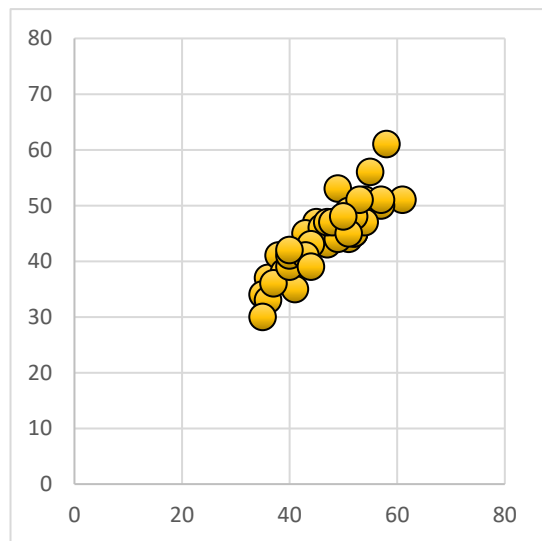

| 10 S | 20 S | Y <sub>GM</sub> | $\sigma_Y$ | $\chi^2$ |
|------|------|-----------------|------------|----------|
| 36   | 37   | 34.6            | 6.08       | 0.16     |
| 45   | 47   | 42.8            | 6.86       | 0.38     |
| 38   | 41   | 36.4            | 6.40       | 0.52     |
| 49   | 53   | 46.5            | 7.28       | 0.81     |
| 45   | 44   | 42.8            | 6.63       | 0.03     |
| 54   | 51   | 51.0            | 7.14       | 0.00     |
| 39   | 38   | 37.3            | 6.16       | 0.01     |
| 51   | 44   | 48.3            | 6.63       | 0.42     |
| 41   | 35   | 39.1            | 5.92       | 0.49     |
| 61   | 51   | 57.4            | 7.14       | 0.81     |
| 51   | 49   | 48.3            | 7.00       | 0.01     |
| 57   | 50   | 53.8            | 7.07       | 0.29     |
| 47   | 43   | 44.6            | 6.56       | 0.06     |
| 49   | 45   | 46.5            | 6.71       | 0.05     |
| 52   | 45   | 49.2            | 6.71       | 0.39     |
| 35   | 34   | 33.6            | 5.83       | 0.00     |
| 52   | 45   | 49.2            | 6.71       | 0.39     |
| 36   | 33   | 34.6            | 5.74       | 0.07     |
| 54   | 47   | 51.0            | 6.86       | 0.35     |
| 58   | 61   | 54.7            | 7.81       | 0.65     |
| 35   | 30   | 33.6            | 5.48       | 0.44     |
| 57   | 51   | 53.8            | 7.14       | 0.15     |
| 37   | 36   | 35.5            | 6.00       | 0.01     |
| 40   | 39   | 38.2            | 6.24       | 0.02     |
| 43   | 45   | 41.0            | 6.71       | 0.36     |
| 46   | 46   | 43.7            | 6.78       | 0.11     |
| 40   | 41   | 38.2            | 6.40       | 0.19     |
| 49   | 44   | 46.5            | 6.63       | 0.14     |
| 55   | 56   | 51.9            | 7.48       | 0.29     |
| 47   | 47   | 44.6            | 6.86       | 0.12     |
| 52   | 48   | 49.2            | 6.93       | 0.03     |
| 44   | 43   | 41.9            | 6.56       | 0.03     |

|    |    |      |      |      |
|----|----|------|------|------|
| 43 | 41 | 41.0 | 6.40 | 0.00 |
| 48 | 47 | 45.5 | 6.86 | 0.05 |
| 53 | 51 | 50.1 | 7.14 | 0.02 |
| 51 | 45 | 48.3 | 6.71 | 0.24 |
| 40 | 42 | 38.2 | 6.48 | 0.34 |
| 50 | 48 | 47.4 | 6.93 | 0.01 |
| 44 | 39 | 41.9 | 6.24 | 0.21 |

| DEMING                   | $\lambda$ | Intcpt. | Slope |
|--------------------------|-----------|---------|-------|
| Y   X                    | 0.00      | 4.52    | 0.85  |
| X   Y                    | 1000      | -3.00   | 1.02  |
| ORT.                     | 1.00      | 1.84    | 0.91  |
| GMR                      | 1.20      | 1.55    | 0.91  |
|                          |           |         |       |
| Tracks                   |           | 1688    | 1600  |
| Fields                   |           | 38.0    | 38.0  |
| Means                    |           | 44.4    | 42.1  |
| Variances                |           | 42.5    | 35.4  |
| Stan.Deviat.             |           | 6.52    | 5.95  |
| SD/SD <sub>POISSON</sub> |           | 1.06    | 0.97  |
| Covariances              |           | 35.9    |       |
| P( $\chi^2$ )            |           | 1.00    |       |
| Correl                   |           | 0.95    |       |
| MSWD                     |           | 0.09    |       |

| 20 S | 30 S | Y <sub>GM</sub> | $\sigma_Y$ | $\chi^2$ |
|------|------|-----------------|------------|----------|
| 37   | 36   | 35.5            | 6.00       | 0.01     |
| 47   | 38   | 44.6            | 6.16       | 1.15     |
| 41   | 38   | 39.1            | 6.16       | 0.03     |
| 53   | 49   | 50.1            | 7.00       | 0.03     |
| 51   | 49   | 48.3            | 7.00       | 0.01     |
| 38   | 37   | 36.4            | 6.08       | 0.01     |
| 44   | 41   | 41.9            | 6.40       | 0.02     |
| 35   | 34   | 33.6            | 5.83       | 0.00     |
| 51   | 51   | 48.3            | 7.14       | 0.14     |
| 49   | 48   | 46.5            | 6.93       | 0.05     |
| 50   | 46   | 47.4            | 6.78       | 0.04     |
| 43   | 40   | 41.0            | 6.32       | 0.02     |
| 45   | 42   | 42.8            | 6.48       | 0.01     |
| 45   | 40   | 42.8            | 6.32       | 0.19     |
| 34   | 33   | 32.7            | 5.74       | 0.00     |
| 45   | 42   | 42.8            | 6.48       | 0.01     |
| 33   | 33   | 31.8            | 5.74       | 0.04     |
| 47   | 41   | 44.6            | 6.40       | 0.32     |
| 61   | 58   | 57.4            | 7.62       | 0.01     |
| 30   | 31   | 29.1            | 5.57       | 0.12     |
| 51   | 49   | 48.3            | 7.00       | 0.01     |
| 36   | 36   | 34.6            | 6.00       | 0.06     |
| 39   | 37   | 37.3            | 6.08       | 0.00     |
| 45   | 41   | 42.8            | 6.40       | 0.08     |

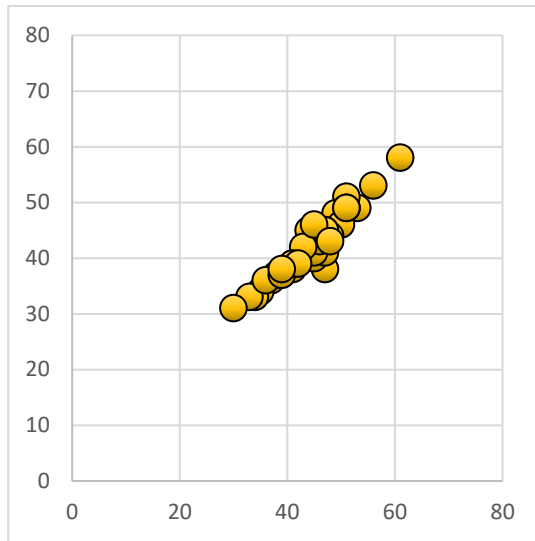

|    |    |      |      |      |
|----|----|------|------|------|
| 46 | 43 | 43.7 | 6.56 | 0.01 |
| 41 | 39 | 39.1 | 6.24 | 0.00 |
| 44 | 45 | 41.9 | 6.71 | 0.22 |
| 56 | 53 | 52.9 | 7.28 | 0.00 |
| 47 | 45 | 44.6 | 6.71 | 0.00 |
| 48 | 44 | 45.5 | 6.63 | 0.05 |
| 43 | 42 | 41.0 | 6.48 | 0.03 |
| 41 | 39 | 39.1 | 6.24 | 0.00 |
| 47 | 45 | 44.6 | 6.71 | 0.00 |
| 51 | 49 | 48.3 | 7.00 | 0.01 |
| 45 | 46 | 42.8 | 6.78 | 0.22 |
| 42 | 39 | 40.0 | 6.24 | 0.03 |
| 48 | 43 | 45.5 | 6.56 | 0.15 |
| 39 | 38 | 37.3 | 6.16 | 0.01 |

| DEMING                 | $\lambda$ | Intcpt. | Slope |
|------------------------|-----------|---------|-------|
| Y   X                  | 0.00      | 9.28    | 0.70  |
| X   Y                  | 1000      | -4.83   | 1.00  |
| ORT.                   | 1.00      | 4.25    | 0.81  |
| GMR                    | 1.43      | 2.95    | 0.84  |
|                        |           |         |       |
| Tracks                 |           | 1779    | 1600  |
| Fields                 |           | 38.0    | 38.0  |
| Means                  |           | 46.8    | 42.1  |
| Variances              |           | 50.6    | 35.4  |
| S.Deviation            |           | 7.11    | 5.95  |
| SD/SD <sub>POISS</sub> |           | 1.15    | 0.97  |
| Covariance             |           | 35.5    |       |
| P( $\chi^2$ )          |           | 0.93    |       |
| Correl                 |           | 0.86    |       |
| MSWD                   |           | 0.41    |       |

| 10 S | 30 S | Y <sub>GM</sub> | $\sigma_Y$ | $\chi^2$ |
|------|------|-----------------|------------|----------|
| 36   | 36   | 34.6            | 6.00       | 0.06     |
| 45   | 38   | 42.8            | 6.16       | 0.60     |
| 38   | 38   | 36.4            | 6.16       | 0.07     |
| 49   | 49   | 46.5            | 7.00       | 0.13     |
| 54   | 49   | 51.0            | 7.00       | 0.08     |
| 39   | 37   | 37.3            | 6.08       | 0.00     |
| 51   | 41   | 48.3            | 6.40       | 1.29     |
| 41   | 34   | 39.1            | 5.83       | 0.77     |
| 61   | 51   | 57.4            | 7.14       | 0.81     |
| 51   | 48   | 48.3            | 6.93       | 0.00     |
| 57   | 46   | 53.8            | 6.78       | 1.31     |
| 47   | 40   | 44.6            | 6.32       | 0.53     |
| 49   | 42   | 46.5            | 6.48       | 0.47     |
| 52   | 40   | 49.2            | 6.32       | 2.12     |
| 35   | 33   | 33.6            | 5.74       | 0.01     |
| 52   | 42   | 49.2            | 6.48       | 1.23     |

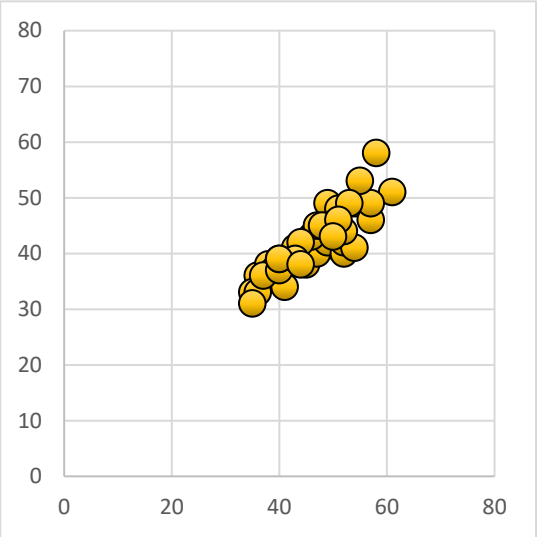

|    |    |      |      |      |
|----|----|------|------|------|
| 36 | 33 | 34.6 | 5.74 | 0.07 |
| 54 | 41 | 51.0 | 6.40 | 2.45 |
| 58 | 58 | 54.7 | 7.62 | 0.19 |
| 35 | 31 | 33.6 | 5.57 | 0.22 |
| 57 | 49 | 53.8 | 7.00 | 0.47 |
| 37 | 36 | 35.5 | 6.00 | 0.01 |
| 40 | 37 | 38.2 | 6.08 | 0.04 |
| 43 | 41 | 41.0 | 6.40 | 0.00 |
| 46 | 43 | 43.7 | 6.56 | 0.01 |
| 40 | 39 | 38.2 | 6.24 | 0.02 |
| 49 | 45 | 46.5 | 6.71 | 0.05 |
| 55 | 53 | 51.9 | 7.28 | 0.02 |
| 47 | 45 | 44.6 | 6.71 | 0.00 |
| 52 | 44 | 49.2 | 6.63 | 0.61 |
| 44 | 42 | 41.9 | 6.48 | 0.00 |
| 43 | 39 | 41.0 | 6.24 | 0.10 |
| 48 | 45 | 45.5 | 6.71 | 0.01 |
| 53 | 49 | 50.1 | 7.00 | 0.03 |
| 51 | 46 | 48.3 | 6.78 | 0.11 |
| 40 | 39 | 38.2 | 6.24 | 0.02 |
| 50 | 43 | 47.4 | 6.56 | 0.44 |
| 44 | 38 | 41.9 | 6.16 | 0.40 |

| DEMING                 | $\lambda$ | Intcpt. | Slope |
|------------------------|-----------|---------|-------|
| Y   X                  | 0.00      | 11.88   | 0.88  |
| X   Y                  | 1000      | -11.50  | 0.85  |
| ORT.                   | 1.00      | 2.95    | 1.02  |
| GMR                    | 0.97      | 3.09    | 1.01  |
| Tracks                 |           | 2060    | 2187  |
| Fields                 |           | 32.0    | 32.0  |
| Means                  |           | 64.4    | 68.4  |
| Variances              |           | 92.5    | 95.2  |
| S.Deviation            |           | 9.62    | 9.76  |
| SD/SD <sub>POISS</sub> |           | 1.70    | 1.72  |
| Covariance             |           | 81.2    |       |
| P( $\chi^2$ )          |           | 0.97    |       |
| Correl                 |           | 0.89    |       |
| MSWD                   |           | 0.32    |       |

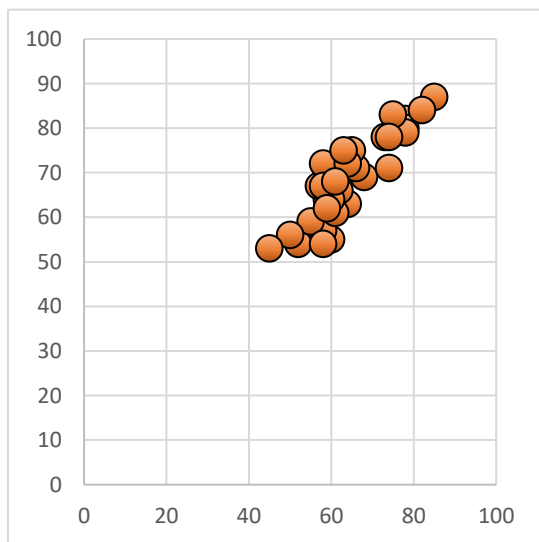

| 10 S | 20 S | Y <sub>GM</sub> | $\sigma_Y$ | $\chi^2$ |
|------|------|-----------------|------------|----------|
| 78   | 82   | 82.2            | 9.06       | 0.00     |
| 52   | 54   | 55.9            | 7.35       | 0.06     |
| 64   | 63   | 68.0            | 7.94       | 0.40     |
| 60   | 63   | 64.0            | 7.94       | 0.01     |
| 68   | 69   | 72.1            | 8.31       | 0.14     |
| 78   | 80   | 82.2            | 8.94       | 0.06     |
| 60   | 55   | 64.0            | 7.42       | 1.46     |
| 78   | 79   | 82.2            | 8.89       | 0.13     |
| 58   | 57   | 61.9            | 7.55       | 0.43     |
| 85   | 87   | 89.3            | 9.33       | 0.06     |
| 75   | 83   | 79.2            | 9.11       | 0.18     |
| 66   | 71   | 70.1            | 8.43       | 0.01     |
| 61   | 61   | 65.0            | 7.81       | 0.26     |
| 59   | 64   | 63.0            | 8.00       | 0.02     |
| 65   | 75   | 69.0            | 8.66       | 0.47     |
| 57   | 67   | 60.9            | 8.19       | 0.55     |
| 58   | 72   | 61.9            | 8.49       | 1.41     |
| 73   | 78   | 77.2            | 8.83       | 0.01     |
| 62   | 66   | 66.0            | 8.12       | 0.00     |
| 55   | 59   | 58.9            | 7.68       | 0.00     |
| 64   | 72   | 68.0            | 8.49       | 0.22     |
| 50   | 56   | 53.8            | 7.48       | 0.08     |
| 74   | 71   | 78.2            | 8.43       | 0.72     |
| 60   | 64   | 64.0            | 8.00       | 0.00     |
| 58   | 67   | 61.9            | 8.19       | 0.38     |
| 45   | 53   | 48.7            | 7.28       | 0.34     |
| 58   | 54   | 61.9            | 7.35       | 1.17     |
| 61   | 68   | 65.0            | 8.25       | 0.13     |
| 59   | 62   | 63.0            | 7.87       | 0.01     |
| 82   | 84   | 86.3            | 9.17       | 0.06     |
| 74   | 78   | 78.2            | 8.83       | 0.00     |
| 63   | 75   | 67.0            | 8.66       | 0.85     |

| DEMING                   | $\lambda$ | Intcpt. | Slope |
|--------------------------|-----------|---------|-------|
| Y   X                    | 0.00      | 9.11    | 0.88  |
| X   Y                    | 1000      | 2.73    | 0.97  |
| ORT.                     | 1.00      | 4.31    | 0.95  |
| GMR                      | 1.11      | 4.03    | 0.95  |
| Tracks                   |           | 2187    | 2210  |
| Fields                   |           | 32.0    | 32.0  |
| Means                    |           | 68.4    | 69.1  |
| Variances                |           | 95.2    | 86.1  |
| Stan.Deviat.             |           | 9.76    | 9.28  |
| SD/SD <sub>POISSON</sub> |           | 1.72    | 1.64  |
| Covariances              |           | 83.4    |       |
| P( $\chi^2$ )            |           | 1.00    |       |
| Correl                   |           | 0.95    |       |
| MSWD                     |           | 0.32    |       |

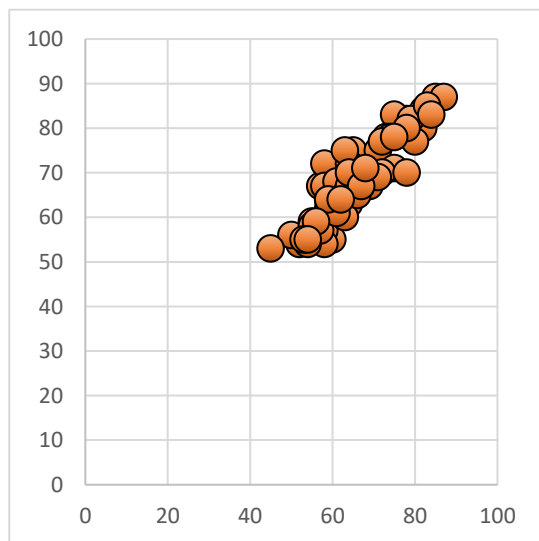

| 20 S | 30 S | $Y_{GM}$ | $\sigma_Y$ | $\chi^2$ |
|------|------|----------|------------|----------|
| 82   | 80   | 86.3     | 8.94       | 0.49     |
| 54   | 54   | 57.9     | 7.35       | 0.28     |
| 63   | 60   | 67.0     | 7.75       | 0.82     |
| 63   | 65   | 67.0     | 8.06       | 0.06     |
| 69   | 67   | 73.1     | 8.19       | 0.56     |
| 80   | 77   | 84.3     | 8.77       | 0.68     |
| 55   | 58   | 58.9     | 7.62       | 0.01     |
| 79   | 82   | 83.2     | 9.06       | 0.02     |
| 57   | 57   | 60.9     | 7.55       | 0.27     |
| 87   | 87   | 91.4     | 9.33       | 0.22     |
| 83   | 85   | 87.3     | 9.22       | 0.06     |
| 71   | 75   | 75.1     | 8.66       | 0.00     |
| 61   | 61   | 65.0     | 7.81       | 0.26     |
| 64   | 67   | 68.0     | 8.19       | 0.02     |
| 75   | 71   | 79.2     | 8.43       | 0.94     |
| 67   | 67   | 71.1     | 8.19       | 0.25     |
| 72   | 70   | 76.1     | 8.37       | 0.54     |
| 78   | 80   | 82.2     | 8.94       | 0.06     |
| 66   | 65   | 70.1     | 8.06       | 0.39     |
| 59   | 64   | 63.0     | 8.00       | 0.02     |
| 72   | 77   | 76.1     | 8.77       | 0.01     |
| 56   | 59   | 59.9     | 7.68       | 0.01     |
| 71   | 69   | 75.1     | 8.31       | 0.54     |
| 64   | 70   | 68.0     | 8.37       | 0.06     |
| 67   | 67   | 71.1     | 8.19       | 0.25     |
| 53   | 55   | 56.9     | 7.42       | 0.06     |
| 54   | 55   | 57.9     | 7.42       | 0.15     |
| 68   | 71   | 72.1     | 8.43       | 0.02     |
| 62   | 64   | 66.0     | 8.00       | 0.06     |
| 84   | 83   | 88.3     | 9.11       | 0.34     |
| 78   | 70   | 82.2     | 8.37       | 2.14     |
| 75   | 78   | 79.2     | 8.83       | 0.02     |

| DEMING                 | $\lambda$ | Intcpt. | Slope |
|------------------------|-----------|---------|-------|
| Y   X                  | 0.00      | 19.41   | 0.77  |
| X   Y                  | 1000      | 15.67   | 0.83  |
| ORT.                   | 1.00      | 7.53    | 0.96  |
| GMR                    | 1.07      | 6.97    | 0.96  |
| Tracks                 |           | 2060    | 2210  |
| Fields                 |           | 32.0    | 32.0  |
| Means                  |           | 64.4    | 69.1  |
| Variances              |           | 92.5    | 86.1  |
| S.Deviation            |           | 9.62    | 9.28  |
| SD/SD <sub>POISS</sub> |           | 1.70    | 1.64  |
| Covariance             |           | 71.4    |       |
| P( $\chi^2$ )          |           | 1.00    |       |
| Correl                 |           | 0.83    |       |
| MSWD                   |           | 0.49    |       |

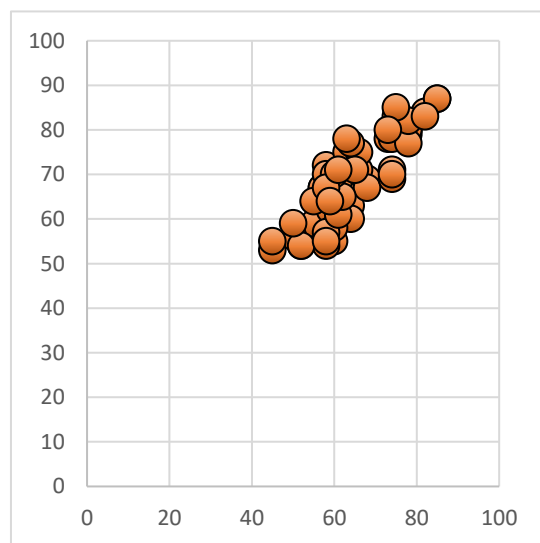

| 10 S | 30 S | Y <sub>GM</sub> | $\sigma_Y$ | $\chi^2$ |
|------|------|-----------------|------------|----------|
| 78   | 80   | 82.2            | 8.94       | 0.06     |
| 52   | 54   | 55.9            | 7.35       | 0.06     |
| 64   | 60   | 68.0            | 7.75       | 1.07     |
| 60   | 65   | 64.0            | 8.06       | 0.02     |
| 68   | 67   | 72.1            | 8.19       | 0.39     |
| 78   | 77   | 82.2            | 8.77       | 0.36     |
| 60   | 58   | 64.0            | 7.62       | 0.61     |
| 78   | 82   | 82.2            | 9.06       | 0.00     |
| 58   | 57   | 61.9            | 7.55       | 0.43     |
| 85   | 87   | 89.3            | 9.33       | 0.06     |
| 75   | 85   | 79.2            | 9.22       | 0.40     |
| 66   | 75   | 70.1            | 8.66       | 0.33     |
| 61   | 61   | 65.0            | 7.81       | 0.26     |
| 59   | 67   | 63.0            | 8.19       | 0.24     |
| 65   | 71   | 69.0            | 8.43       | 0.05     |
| 57   | 67   | 60.9            | 8.19       | 0.55     |
| 58   | 70   | 61.9            | 8.37       | 0.93     |
| 73   | 80   | 77.2            | 8.94       | 0.10     |
| 62   | 65   | 66.0            | 8.06       | 0.02     |
| 55   | 64   | 58.9            | 8.00       | 0.41     |
| 64   | 77   | 68.0            | 8.77       | 1.05     |
| 50   | 59   | 53.8            | 7.68       | 0.45     |
| 74   | 69   | 78.2            | 8.31       | 1.22     |
| 60   | 70   | 64.0            | 8.37       | 0.52     |
| 58   | 67   | 61.9            | 8.19       | 0.38     |
| 45   | 55   | 48.7            | 7.42       | 0.71     |
| 58   | 55   | 61.9            | 7.42       | 0.88     |
| 61   | 71   | 65.0            | 8.43       | 0.51     |
| 59   | 64   | 63.0            | 8.00       | 0.02     |
| 82   | 83   | 86.3            | 9.11       | 0.13     |
| 74   | 70   | 78.2            | 8.37       | 0.95     |
| 63   | 78   | 67.0            | 8.83       | 1.55     |

| DEMING                 | $\lambda$ | Intcpt. | Slope |
|------------------------|-----------|---------|-------|
| Y   X                  | 0.00      | 7.38    | 0.91  |
| X   Y                  | 1000      | -7.92   | 0.87  |
| ORT.                   | 1.00      | 1.82    | 1.02  |
| GMR                    | 0.96      | 1.94    | 1.02  |
| Tracks                 |           | 2302    | 2442  |
| Fields                 |           | 48.0    | 48.0  |
| Means                  |           | 48.0    | 50.9  |
| Variances              |           | 46.3    | 48.2  |
| S.Deviation            |           | 6.80    | 6.94  |
| SD/SD <sub>POISS</sub> |           | 0.98    | 1.00  |
| Covariance             |           | 42.0    |       |
| P( $\chi^2$ )          |           | 1.00    |       |
| Correl                 |           | 0.91    |       |
| MSWD                   |           | 0.18    |       |

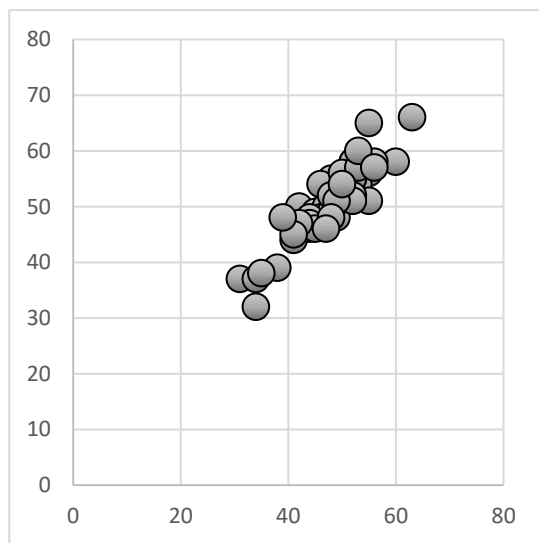

| 10 S | 20 S | Y <sub>GM</sub> | $\sigma_Y$ | $\chi^2$ |
|------|------|-----------------|------------|----------|
| 52   | 58   | 55.0            | 7.62       | 0.16     |
| 48   | 55   | 50.9            | 7.42       | 0.30     |
| 42   | 50   | 44.8            | 7.07       | 0.54     |
| 53   | 56   | 56.0            | 7.48       | 0.00     |
| 41   | 44   | 43.8            | 6.63       | 0.00     |
| 52   | 58   | 55.0            | 7.62       | 0.16     |
| 54   | 56   | 57.0            | 7.48       | 0.02     |
| 55   | 56   | 58.1            | 7.48       | 0.08     |
| 53   | 54   | 56.0            | 7.35       | 0.08     |
| 34   | 32   | 36.6            | 5.66       | 0.67     |
| 49   | 48   | 51.9            | 6.93       | 0.32     |
| 52   | 55   | 55.0            | 7.42       | 0.00     |
| 45   | 49   | 47.9            | 7.00       | 0.03     |
| 63   | 66   | 66.2            | 8.12       | 0.00     |
| 46   | 54   | 48.9            | 7.35       | 0.49     |
| 55   | 51   | 58.1            | 7.14       | 0.98     |
| 51   | 53   | 54.0            | 7.28       | 0.02     |
| 52   | 55   | 55.0            | 7.42       | 0.00     |
| 52   | 52   | 55.0            | 7.21       | 0.17     |
| 49   | 51   | 51.9            | 7.14       | 0.02     |
| 55   | 65   | 58.1            | 8.06       | 0.74     |
| 60   | 58   | 63.2            | 7.62       | 0.46     |
| 49   | 51   | 51.9            | 7.14       | 0.02     |
| 47   | 50   | 49.9            | 7.07       | 0.00     |
| 52   | 51   | 55.0            | 7.14       | 0.31     |
| 50   | 56   | 53.0            | 7.48       | 0.17     |
| 46   | 48   | 48.9            | 6.93       | 0.02     |
| 53   | 57   | 56.0            | 7.55       | 0.02     |
| 44   | 46   | 46.8            | 6.78       | 0.02     |
| 48   | 49   | 50.9            | 7.00       | 0.08     |
| 56   | 58   | 59.1            | 7.62       | 0.02     |
| 44   | 48   | 46.8            | 6.93       | 0.03     |

|    |    |      |      |      |
|----|----|------|------|------|
| 48 | 52 | 50.9 | 7.21 | 0.02 |
| 49 | 51 | 51.9 | 7.14 | 0.02 |
| 53 | 60 | 56.0 | 7.75 | 0.26 |
| 31 | 37 | 33.6 | 6.08 | 0.32 |
| 34 | 37 | 36.6 | 6.08 | 0.00 |
| 44 | 47 | 46.8 | 6.86 | 0.00 |
| 50 | 54 | 53.0 | 7.35 | 0.02 |
| 56 | 57 | 59.1 | 7.55 | 0.08 |
| 45 | 46 | 47.9 | 6.78 | 0.07 |
| 42 | 47 | 44.8 | 6.86 | 0.10 |
| 41 | 45 | 43.8 | 6.71 | 0.03 |
| 38 | 39 | 40.7 | 6.24 | 0.08 |
| 48 | 48 | 50.9 | 6.93 | 0.18 |
| 47 | 46 | 49.9 | 6.78 | 0.33 |
| 35 | 38 | 37.7 | 6.16 | 0.00 |
| 39 | 48 | 41.7 | 6.93 | 0.82 |

| DEMING                   | $\lambda$ | Intcpt. | Slope |
|--------------------------|-----------|---------|-------|
| Y   X                    | 0.00      | 5.97    | 0.91  |
| X   Y                    | 1000      | 4.13    | 0.95  |
| ORT.                     | 1.00      | 2.57    | 0.98  |
| GMR                      | 1.04      | 2.49    | 0.98  |
| Tracks                   |           | 2442    | 2515  |
| Fields                   |           | 48.0    | 48.0  |
| Means                    |           | 50.9    | 52.4  |
| Variances                |           | 48.2    | 46.3  |
| Stan.Deviat.             |           | 6.94    | 6.81  |
| SD/SD <sub>POISSON</sub> |           | 1.00    | 0.98  |
| Covariances              |           | 43.9    |       |
| P( $\chi^2$ )            |           | 1.00    |       |
| Correl                   |           | 0.95    |       |
| MSWD                     |           | 0.14    |       |

| 20 S | 30 S | $Y_{GM}$ | $\sigma_Y$ | $\chi^2$ |
|------|------|----------|------------|----------|
| 58   | 62   | 61.1     | 7.87       | 0.01     |
| 55   | 53   | 58.1     | 7.28       | 0.48     |
| 50   | 53   | 53.0     | 7.28       | 0.00     |
| 56   | 57   | 59.1     | 7.55       | 0.08     |
| 44   | 48   | 46.8     | 6.93       | 0.03     |
| 58   | 60   | 61.1     | 7.75       | 0.02     |
| 56   | 58   | 59.1     | 7.62       | 0.02     |
| 56   | 61   | 59.1     | 7.81       | 0.06     |
| 54   | 53   | 57.0     | 7.28       | 0.31     |
| 32   | 35   | 34.6     | 5.92       | 0.00     |
| 48   | 49   | 50.9     | 7.00       | 0.08     |
| 55   | 53   | 58.1     | 7.28       | 0.48     |
| 49   | 52   | 51.9     | 7.21       | 0.00     |
| 66   | 63   | 69.3     | 7.94       | 0.63     |
| 54   | 56   | 57.0     | 7.48       | 0.02     |

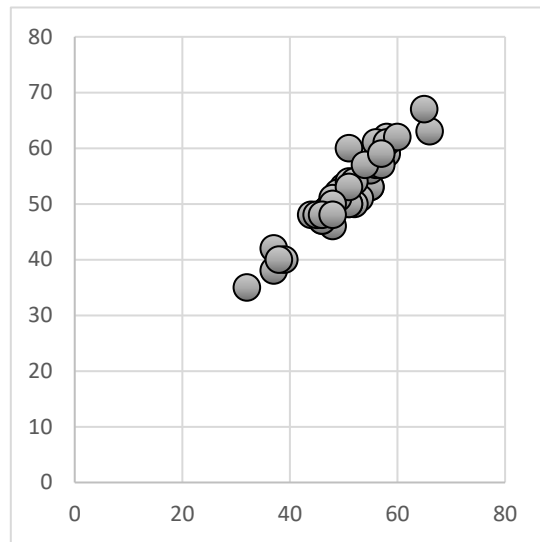

|    |    |      |      |      |
|----|----|------|------|------|
| 51 | 60 | 54.0 | 7.75 | 0.60 |
| 53 | 51 | 56.0 | 7.14 | 0.49 |
| 55 | 56 | 58.1 | 7.48 | 0.08 |
| 52 | 50 | 55.0 | 7.07 | 0.50 |
| 51 | 50 | 54.0 | 7.07 | 0.32 |
| 65 | 67 | 68.3 | 8.19 | 0.02 |
| 58 | 59 | 61.1 | 7.68 | 0.08 |
| 51 | 54 | 54.0 | 7.35 | 0.00 |
| 50 | 51 | 53.0 | 7.14 | 0.08 |
| 51 | 50 | 54.0 | 7.07 | 0.32 |
| 56 | 57 | 59.1 | 7.55 | 0.08 |
| 48 | 46 | 50.9 | 6.78 | 0.53 |
| 57 | 57 | 60.1 | 7.55 | 0.17 |
| 46 | 47 | 48.9 | 6.86 | 0.07 |
| 49 | 51 | 51.9 | 7.14 | 0.02 |
| 58 | 61 | 61.1 | 7.81 | 0.00 |
| 48 | 51 | 50.9 | 7.14 | 0.00 |
| 52 | 54 | 55.0 | 7.35 | 0.02 |
| 51 | 53 | 54.0 | 7.28 | 0.02 |
| 60 | 62 | 63.2 | 7.87 | 0.02 |
| 37 | 38 | 39.7 | 6.16 | 0.08 |
| 37 | 42 | 39.7 | 6.48 | 0.13 |
| 47 | 49 | 49.9 | 7.00 | 0.02 |
| 54 | 57 | 57.0 | 7.55 | 0.00 |
| 57 | 59 | 60.1 | 7.68 | 0.02 |
| 46 | 47 | 48.9 | 6.86 | 0.07 |
| 47 | 49 | 49.9 | 7.00 | 0.02 |
| 45 | 48 | 47.9 | 6.93 | 0.00 |
| 39 | 40 | 41.7 | 6.32 | 0.08 |
| 48 | 50 | 50.9 | 7.07 | 0.02 |
| 46 | 48 | 48.9 | 6.93 | 0.02 |
| 38 | 40 | 40.7 | 6.32 | 0.01 |
| 48 | 48 | 50.9 | 6.93 | 0.18 |

| DEMING                 | $\lambda$ | Intcpt. | Slope |
|------------------------|-----------|---------|-------|
| Y   X                  | 0.00      | 11.57   | 0.85  |
| X   Y                  | 1000      | 11.63   | 0.85  |
| ORT.                   | 1.00      | 4.39    | 1.00  |
| GMR                    | 1.00      | 4.40    | 1.00  |
| Tracks                 |           | 2302    | 2515  |
| Fields                 |           | 48.0    | 48.0  |
| Means                  |           | 48.0    | 52.4  |
| Variances              |           | 46.3    | 46.3  |
| S.Deviation            |           | 6.80    | 6.81  |
| SD/SD <sub>POISS</sub> |           | 0.98    | 0.98  |
| Covariance             |           | 39.4    |       |
| P( $\chi^2$ )          |           | 0.94    |       |
| Correl                 |           | 0.87    |       |
| MSWD                   |           | 0.28    |       |

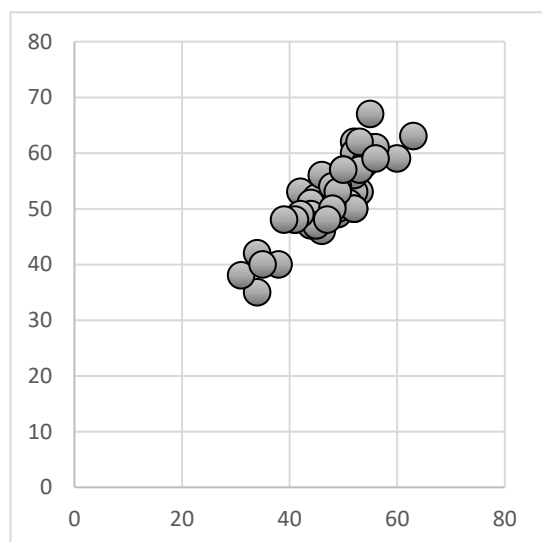

| 10 S | 30 S | Y <sub>GM</sub> | $\sigma_Y$ | $\chi^2$ |
|------|------|-----------------|------------|----------|
| 52   | 62   | 55.0            | 7.87       | 0.79     |
| 48   | 53   | 50.9            | 7.28       | 0.08     |
| 42   | 53   | 44.8            | 7.28       | 1.27     |
| 53   | 57   | 56.0            | 7.55       | 0.02     |
| 41   | 48   | 43.8            | 6.93       | 0.37     |
| 52   | 60   | 55.0            | 7.75       | 0.42     |
| 54   | 58   | 57.0            | 7.62       | 0.02     |
| 55   | 61   | 58.1            | 7.81       | 0.14     |
| 53   | 53   | 56.0            | 7.28       | 0.17     |
| 34   | 35   | 36.6            | 5.92       | 0.08     |
| 49   | 49   | 51.9            | 7.00       | 0.18     |
| 52   | 53   | 55.0            | 7.28       | 0.08     |
| 45   | 52   | 47.9            | 7.21       | 0.33     |
| 63   | 63   | 66.2            | 7.94       | 0.16     |
| 46   | 56   | 48.9            | 7.48       | 0.91     |
| 55   | 60   | 58.1            | 7.75       | 0.06     |
| 51   | 51   | 54.0            | 7.14       | 0.17     |
| 52   | 56   | 55.0            | 7.48       | 0.02     |
| 52   | 50   | 55.0            | 7.07       | 0.50     |
| 49   | 50   | 51.9            | 7.07       | 0.08     |
| 55   | 67   | 58.1            | 8.19       | 1.19     |
| 60   | 59   | 63.2            | 7.68       | 0.29     |
| 49   | 54   | 51.9            | 7.35       | 0.08     |
| 47   | 51   | 49.9            | 7.14       | 0.02     |
| 52   | 50   | 55.0            | 7.07       | 0.50     |
| 50   | 57   | 53.0            | 7.55       | 0.29     |
| 46   | 46   | 48.9            | 6.78       | 0.18     |
| 53   | 57   | 56.0            | 7.55       | 0.02     |
| 44   | 47   | 46.8            | 6.86       | 0.00     |
| 48   | 51   | 50.9            | 7.14       | 0.00     |
| 56   | 61   | 59.1            | 7.81       | 0.06     |

|    |    |      |      |      |
|----|----|------|------|------|
| 44 | 51 | 46.8 | 7.14 | 0.34 |
| 48 | 54 | 50.9 | 7.35 | 0.18 |
| 49 | 53 | 51.9 | 7.28 | 0.02 |
| 53 | 62 | 56.0 | 7.87 | 0.58 |
| 31 | 38 | 33.6 | 6.16 | 0.52 |
| 34 | 42 | 36.6 | 6.48 | 0.69 |
| 44 | 49 | 46.8 | 7.00 | 0.10 |
| 50 | 57 | 53.0 | 7.55 | 0.29 |
| 56 | 59 | 59.1 | 7.68 | 0.00 |
| 45 | 47 | 47.9 | 6.86 | 0.02 |
| 42 | 49 | 44.8 | 7.00 | 0.36 |
| 41 | 48 | 43.8 | 6.93 | 0.37 |
| 38 | 40 | 40.7 | 6.32 | 0.01 |
| 48 | 50 | 50.9 | 7.07 | 0.02 |
| 47 | 48 | 49.9 | 6.93 | 0.07 |
| 35 | 40 | 37.7 | 6.32 | 0.14 |
| 39 | 48 | 41.7 | 6.93 | 0.82 |

|        |      |      |      |      |      |      |      |      |      |
|--------|------|------|------|------|------|------|------|------|------|
| Count  | 1824 | 1688 | 1600 | 2060 | 2187 | 2210 | 2302 | 2442 | 2515 |
| Mean   | 3.08 | 6.32 | 9.56 | 1.01 | 1.83 | 2.61 | 1.04 | 2.54 | 3.28 |
| S.dev. | 0.32 | 0.80 | 1.36 | 0.13 | 0.23 | 0.35 | 0.43 | 1.01 | 1.29 |
| Error  | 0.01 | 0.02 | 0.03 | 0.00 | 0.01 | 0.01 | 0.01 | 0.02 | 0.03 |

| B00 Track opening (μm) |      |      |
|------------------------|------|------|
| 10 S                   | 20 S | 30 S |

|      |     |      |
|------|-----|------|
| 3.73 | 6.9 | 9.7  |
| 3.85 | 6.7 | 10.0 |
| 3.65 | 7.1 | 10.2 |
| 3.98 | 6.9 | 10.4 |
| 3.68 | 6.9 | 10.3 |
| 3.60 | 6.8 | 10.5 |
| 3.83 | 6.5 | 9.4  |
| 3.63 | 7.1 | 10.1 |
| 3.76 | 6.8 | 10.3 |
| 3.76 | 6.7 | 10.5 |
| 3.56 | 6.9 | 10.4 |
| 3.88 | 6.8 | 10.5 |
| 3.68 | 6.7 | 10.4 |
| 3.63 | 6.9 | 10.5 |
| 3.88 | 6.8 | 10.3 |
| 3.76 | 6.9 | 10.1 |
| 3.86 | 6.9 | 10.2 |
| 3.85 | 6.8 | 6.1  |
| 3.48 | 6.9 | 10.4 |
| 3.81 | 6.7 | 10.2 |
| 3.63 | 6.9 | 8.1  |
| 3.50 | 7.0 | 10.5 |
| 3.53 | 4.1 | 9.5  |
| 3.71 | 4.9 | 6.9  |
| 3.80 | 6.8 | 9.3  |
| 3.68 | 6.8 | 10.0 |

| P00 Track opening (μm) |      |      |
|------------------------|------|------|
| 10 S                   | 20 S | 30 S |

|      |      |      |
|------|------|------|
| 1.14 | 1.89 | 3.15 |
| 1.14 | 2.04 | 2.87 |
| 1.02 | 1.73 | 2.56 |
| 1.14 | 1.38 | 3.07 |
| 1.02 | 2.04 | 2.87 |
| 1.22 | 1.65 | 2.83 |
| 1.14 | 1.89 | 2.87 |
| 1.22 | 1.81 | 2.79 |
| 1.10 | 1.97 | 2.79 |
| 0.98 | 1.73 | 1.85 |
| 1.14 | 1.89 | 2.95 |
| 0.90 | 2.20 | 2.52 |
| 1.10 | 2.08 | 2.87 |
| 1.06 | 1.89 | 2.79 |
| 1.02 | 1.81 | 2.63 |
| 1.30 | 1.65 | 2.71 |
| 1.18 | 2.28 | 2.52 |
| 1.14 | 2.09 | 2.63 |
| 0.98 | 1.81 | 2.79 |
| 1.14 | 1.53 | 2.79 |
| 1.06 | 1.89 | 2.44 |
| 1.10 | 1.85 | 1.73 |
| 1.06 | 1.97 | 2.71 |
| 0.83 | 1.61 | 2.63 |
| 1.14 | 1.85 | 2.56 |
| 1.06 | 1.89 | 2.79 |

| B60 Track opening (μm) |      |      |
|------------------------|------|------|
| 10 S                   | 20 S | 30 S |

|      |      |      |
|------|------|------|
| 0.83 | 2.65 | 3.73 |
| 0.79 | 1.42 | 2.55 |
| 1.20 | 3.80 | 5.15 |
| 0.67 | 2.94 | 4.38 |
| 1.58 | 3.85 | 3.94 |
| 0.56 | 1.44 | 3.72 |
| 1.45 | 2.81 | 2.48 |
| 0.88 | 1.74 | 3.04 |
| 0.62 | 1.07 | 2.01 |
| 0.99 | 1.94 | 6.64 |
| 1.32 | 6.25 | 3.37 |
| 0.67 | 2.18 | 3.74 |
| 1.11 | 2.42 | 4.20 |
| 1.32 | 3.02 | 1.94 |
| 1.33 | 1.54 | 3.05 |
| 1.12 | 2.08 | 5.21 |
| 0.58 | 3.65 | 5.45 |
| 1.99 | 4.43 | 4.06 |
| 1.28 | 2.55 | 2.77 |
| 1.22 | 3.46 | 4.32 |
| 0.72 | 1.14 | 1.90 |
| 0.88 | 2.91 | 4.22 |
| 1.07 | 1.96 | 0.78 |
| 0.96 | 1.08 | 1.02 |
| 0.94 | 1.99 | 0.92 |
| 1.30 | 1.37 | 5.62 |

|      |     |      |      |      |      |      |      |      |
|------|-----|------|------|------|------|------|------|------|
| 3.50 | 6.6 | 10.2 | 1.06 | 1.89 | 2.71 | 1.50 | 3.06 | 2.29 |
| 3.66 | 6.5 | 10.5 | 1.10 | 1.89 | 2.63 | 0.90 | 2.13 | 6.06 |
| 3.86 | 6.7 | 10.1 | 1.30 | 1.89 | 2.04 | 1.22 | 3.08 | 6.87 |
| 3.66 | 6.8 | 10.0 | 1.06 | 1.97 | 2.40 | 0.67 | 1.39 | 2.28 |
| 3.50 | 7.1 | 10.4 | 0.90 | 2.09 | 2.48 | 1.08 | 2.24 | 2.95 |
| 2.51 | 5.3 | 10.3 | 1.02 | 1.73 | 2.63 | 1.17 | 4.26 | 5.66 |
| 3.51 | 3.7 | 10.5 | 1.02 | 1.69 | 2.71 | 1.47 | 2.86 | 3.30 |
| 3.63 | 2.9 | 10.4 | 0.98 | 1.89 | 2.87 | 0.91 | 3.13 | 3.06 |
| 2.96 | 6.8 | 6.3  | 1.06 | 1.81 | 2.52 | 1.10 | 2.79 | 1.78 |
| 3.27 | 6.8 | 6.6  | 1.06 | 1.65 | 2.71 | 1.62 | 2.39 | 2.81 |
| 3.46 | 6.7 | 9.9  | 0.90 | 0.63 | 2.79 | 0.67 | 2.86 | 2.20 |
| 3.43 | 6.9 | 10.3 | 1.06 | 1.49 | 2.63 | 1.81 | 1.68 | 6.01 |
| 3.60 | 6.8 | 10.1 | 1.06 | 1.73 | 2.79 | 1.29 | 2.48 | 1.53 |
| 3.36 | 6.4 | 10.0 | 1.14 | 1.53 | 2.59 | 0.89 | 2.95 | 3.54 |
| 3.38 | 6.5 | 9.8  | 1.22 | 1.65 | 1.97 | 0.99 | 1.56 | 3.06 |
| 3.06 | 6.6 | 9.4  | 1.18 | 1.65 | 1.38 | 1.10 | 3.91 | 5.18 |
| 3.55 | 6.2 | 10.1 | 0.90 | 1.65 | 1.38 | 0.78 | 1.22 | 1.96 |
| 3.50 | 6.8 | 10.2 | 1.06 | 1.73 | 2.44 | 0.69 | 1.47 | 1.79 |
| 3.42 | 6.6 | 9.9  | 0.90 | 2.01 | 2.56 | 3.92 | 1.93 | 3.08 |
| 3.48 | 6.8 | 9.8  | 0.90 | 1.18 | 2.56 | 0.93 | 5.81 | 1.66 |
| 3.60 | 6.5 | 10.0 | 1.14 | 1.89 | 2.95 | 0.86 | 1.95 | 1.81 |
| 3.46 | 6.7 | 9.7  | 1.22 | 1.97 | 2.87 | 1.58 | 1.65 | 3.93 |
| 3.39 | 6.7 | 9.2  | 1.06 | 1.26 | 2.91 | 1.11 | 2.17 | 4.53 |
| 3.46 | 6.7 | 9.9  | 0.98 | 1.81 | 2.79 | 0.93 | 3.78 | 3.08 |
| 3.56 | 6.5 | 9.6  | 0.90 | 1.45 | 2.71 | 0.43 | 2.04 | 4.35 |
| 3.54 | 5.9 | 10.0 | 1.02 | 2.04 | 2.56 | 1.10 | 1.68 | 3.81 |
| 3.28 | 6.8 | 7.8  | 1.06 | 1.81 | 2.52 | 1.06 | 2.98 | 3.35 |
| 3.36 | 6.8 | 10.0 | 1.06 | 1.53 | 2.40 | 1.14 | 1.81 | 3.98 |
| 3.43 | 6.7 | 10.2 | 1.10 | 1.89 | 2.63 | 0.93 | 6.00 | 4.20 |
| 3.46 | 6.7 | 10.5 | 1.18 | 1.65 | 2.51 | 0.97 | 0.90 | 2.44 |
| 3.58 | 6.9 | 10.1 | 1.22 | 2.24 | 2.79 | 0.78 | 1.90 | 4.33 |
| 3.27 | 6.9 | 9.5  | 0.98 | 1.73 | 2.56 | 0.73 | 6.45 | 3.63 |
| 3.21 | 6.7 | 10.1 | 1.06 | 1.81 | 2.63 | 0.88 | 3.06 | 3.96 |
| 3.51 | 6.5 | 10.0 | 0.98 | 1.81 | 2.87 | 1.06 | 2.50 | 3.97 |
| 3.44 | 5.9 | 9.8  | 1.10 | 1.89 | 2.71 | 0.72 | 2.18 | 1.26 |

|      |     |      |      |      |      |      |      |      |
|------|-----|------|------|------|------|------|------|------|
| 3.31 | 6.6 | 9.8  | 1.06 | 1.45 | 2.79 | 0.87 | 1.89 | 2.44 |
| 3.40 | 6.6 | 10.4 | 0.90 | 1.89 | 2.63 | 1.17 | 2.71 | 4.02 |
| 3.25 | 6.5 | 10.6 | 1.02 | 1.81 | 2.71 | 1.34 | 2.35 | 3.19 |
| 3.36 | 6.7 | 10.3 | 0.98 | 2.01 | 2.56 | 1.11 | 1.75 | 3.37 |
| 3.21 | 6.5 | 10.3 | 0.98 | 1.69 | 2.24 | 0.68 | 1.95 | 2.82 |
| 2.86 | 6.4 | 5.4  | 0.83 | 2.09 | 1.77 | 1.42 | 2.56 | 3.75 |
| 3.29 | 4.5 | 9.1  | 1.18 | 1.97 | 2.71 | 1.17 | 1.65 | 3.52 |
| 3.31 | 6.6 | 9.8  | 0.98 | 1.89 | 2.71 | 1.02 | 2.64 | 2.63 |
| 3.42 | 6.8 | 10.4 | 1.10 | 1.53 | 2.79 | 0.97 | 2.44 | 2.45 |
| 3.50 | 4.5 | 10.3 | 0.98 | 1.81 | 2.71 | 1.22 | 3.22 | 3.28 |
| 3.63 | 6.7 | 10.2 | 1.14 | 1.57 | 2.63 | 1.63 | 3.89 | 2.73 |
| 3.11 | 6.2 | 9.5  | 1.10 | 2.24 | 3.03 | 1.32 | 2.78 | 4.34 |
| 3.06 | 6.9 | 9.1  | 1.06 | 1.97 | 3.03 | 1.16 | 3.06 | 3.16 |
| 3.38 | 6.8 | 10.1 | 0.98 | 1.65 | 2.79 | 1.42 | 2.76 | 4.11 |
| 3.40 | 4.0 | 10.5 | 0.98 | 1.65 | 2.56 | 0.89 | 3.96 | 5.71 |
| 3.47 | 3.3 | 10.3 | 1.06 | 1.89 | 2.71 | 1.31 | 3.36 | 3.78 |
| 2.29 | 5.8 | 10.2 | 0.98 | 1.77 | 2.87 | 0.80 | 3.23 | 3.47 |
| 2.50 | 4.1 | 10.4 | 0.83 | 1.89 | 2.48 | 0.78 | 2.32 | 3.99 |
| 3.32 | 2.6 | 10.5 | 0.91 | 2.04 | 2.71 | 0.73 | 2.58 | 5.29 |
| 2.13 | 6.6 | 10.2 | 1.15 | 1.73 | 2.49 | 1.00 | 1.05 | 3.90 |
| 3.09 | 6.6 | 10.2 | 1.02 | 1.73 | 2.33 | 1.64 | 2.17 | 2.31 |
| 3.12 | 6.3 | 10.0 | 0.71 | 2.06 | 2.61 | 2.34 | 1.90 | 3.37 |
| 3.40 | 4.8 | 9.1  | 1.02 | 1.98 | 2.29 | 1.10 | 2.91 | 6.10 |
| 3.13 | 6.4 | 10.0 | 0.91 | 2.10 | 2.45 | 1.12 | 2.97 | 1.63 |
| 3.55 | 6.8 | 10.0 | 1.07 | 1.47 | 2.65 | 1.06 | 3.14 | 3.82 |
| 3.52 | 6.7 | 10.2 | 1.11 | 1.85 | 2.87 | 0.67 | 2.12 | 2.94 |
| 3.27 | 6.7 | 9.3  | 0.99 | 2.06 | 2.72 | 0.92 | 4.29 | 0.92 |
| 3.39 | 6.7 | 10.4 | 1.07 | 1.94 | 2.65 | 0.93 | 2.67 | 2.89 |
| 3.19 | 6.5 | 8.2  | 1.11 | 1.49 | 2.61 | 1.45 | 1.70 | 4.40 |
| 3.36 | 6.6 | 5.0  | 1.15 | 1.78 | 1.70 | 1.58 | 3.06 | 4.40 |
| 3.21 | 6.6 | 8.8  | 0.99 | 1.90 | 2.81 | 0.96 | 3.20 | 4.38 |
| 3.17 | 6.6 | 10.2 | 1.22 | 2.21 | 2.53 | 0.70 | 2.63 | 4.32 |
| 3.46 | 6.5 | 9.8  | 1.07 | 1.93 | 2.46 | 2.08 | 1.56 | 5.75 |
| 3.26 | 6.5 | 10.1 | 0.98 | 1.94 | 2.72 | 1.18 | 2.33 | 3.41 |
| 3.26 | 6.5 | 9.5  | 1.02 | 1.90 | 2.77 | 1.48 | 1.96 | 2.85 |

|      |     |      |      |      |      |      |      |      |
|------|-----|------|------|------|------|------|------|------|
| 3.32 | 6.5 | 10.5 | 0.99 | 1.94 | 2.77 | 1.42 | 6.10 | 3.26 |
| 3.31 | 6.2 | 9.7  | 1.27 | 1.98 | 2.33 | 1.99 | 4.06 | 1.81 |
| 3.36 | 6.5 | 9.7  | 1.07 | 1.90 | 2.18 | 1.56 | 3.90 | 3.34 |
| 3.31 | 6.6 | 4.6  | 0.99 | 1.85 | 2.36 | 1.23 | 1.73 | 2.14 |
| 3.02 | 6.3 | 5.2  | 0.91 | 2.06 | 2.32 | 1.67 | 1.95 | 1.39 |
| 3.33 | 6.7 | 9.9  | 0.83 | 2.26 | 2.61 | 1.61 | 3.07 | 0.62 |
| 3.26 | 6.5 | 7.2  | 1.11 | 2.10 | 2.26 | 1.11 | 1.37 | 0.63 |
| 3.39 | 6.4 | 10.2 | 1.07 | 1.98 | 2.77 | 1.40 | 2.63 | 4.02 |
| 3.31 | 6.6 | 10.2 | 1.02 | 2.06 | 2.77 | 0.83 | 3.41 | 1.69 |
| 3.29 | 5.7 | 10.2 | 0.98 | 1.46 | 2.77 | 0.91 | 3.67 | 5.49 |
| 3.42 | 6.5 | 10.5 | 1.19 | 1.70 | 2.68 | 1.45 | 1.68 | 5.39 |
| 2.97 | 6.2 | 10.3 | 0.87 | 1.98 | 2.24 | 1.67 | 1.56 | 3.26 |
| 3.31 | 6.5 | 10.2 | 1.38 | 2.13 | 2.61 | 1.27 | 4.52 | 1.35 |
| 3.17 | 5.4 | 10.0 | 1.07 | 1.97 | 2.61 | 1.86 | 1.69 | 2.24 |
| 3.27 | 5.4 | 10.2 | 1.18 | 2.06 | 2.65 | 0.79 | 3.11 | 2.04 |
| 2.37 | 4.2 | 3.0  | 0.99 | 2.10 | 2.89 | 0.89 | 1.33 | 2.54 |
| 3.13 | 5.3 | 7.4  | 0.67 | 1.90 | 2.77 | 1.06 | 0.51 | 3.95 |
| 3.18 | 6.5 | 10.1 | 1.27 | 1.90 | 2.69 | 1.10 | 3.10 | 4.77 |
| 3.30 | 6.8 | 10.2 | 1.06 | 2.01 | 2.77 | 1.84 | 2.06 | 3.50 |
| 3.01 | 5.6 | 9.7  | 1.15 | 1.81 | 2.87 | 1.51 | 1.93 | 3.99 |
| 2.86 | 6.1 | 9.9  | 0.91 | 2.13 | 2.63 | 0.95 | 1.78 | 2.96 |
| 3.23 | 6.5 | 10.2 | 1.07 | 2.05 | 1.57 | 1.35 | 1.85 | 2.42 |
| 2.17 | 5.4 | 10.3 | 1.14 | 2.09 | 2.77 | 1.07 | 1.83 | 2.34 |
| 3.13 | 6.3 | 10.1 | 1.07 | 1.93 | 3.05 | 0.77 | 2.33 | 2.41 |
| 3.18 | 6.7 | 10.0 | 1.27 | 1.70 | 2.69 | 1.08 | 5.78 | 2.48 |
| 3.21 | 6.3 | 10.2 | 1.02 | 2.06 | 2.61 | 1.17 | 3.13 | 2.77 |
| 3.15 | 2.1 | 10.3 | 0.99 | 2.17 | 2.26 | 0.94 | 3.01 | 6.61 |
| 3.21 | 2.2 | 9.5  | 0.95 | 1.78 | 2.53 | 1.85 | 3.32 | 4.20 |
| 3.31 | 3.2 | 10.2 | 0.95 | 2.06 | 2.76 | 1.02 | 2.63 | 3.69 |
| 3.24 | 4.3 | 10.5 | 1.11 | 1.81 | 2.49 | 0.87 | 3.17 | 3.53 |
| 3.31 | 6.9 | 10.0 | 0.99 | 1.89 | 2.57 | 1.16 | 2.80 | 3.08 |
| 3.28 | 6.7 | 10.4 | 0.98 | 2.09 | 1.98 | 1.17 | 1.66 | 4.45 |
| 3.31 | 6.5 | 10.3 | 0.83 | 2.16 | 2.13 | 2.11 | 2.19 | 3.45 |
| 3.16 | 6.7 | 10.3 | 0.98 | 1.90 | 2.33 | 1.07 | 2.89 | 1.44 |
| 3.27 | 6.8 | 9.5  | 0.72 | 1.50 | 2.33 | 0.95 | 2.93 | 2.66 |

|      |     |      |      |      |      |      |      |      |
|------|-----|------|------|------|------|------|------|------|
| 3.27 | 6.9 | 9.6  | 1.05 | 1.42 | 2.64 | 1.46 | 2.54 | 3.61 |
| 3.48 | 6.7 | 10.5 | 0.92 | 1.81 | 2.89 | 0.76 | 4.41 | 1.13 |
| 3.41 | 6.7 | 9.9  | 1.39 | 0.87 | 2.89 | 0.73 | 2.70 | 4.83 |
| 3.42 | 6.6 | 4.5  | 1.07 | 1.38 | 2.38 | 1.26 | 2.53 | 4.12 |
| 3.11 | 6.7 | 9.8  | 1.28 | 1.81 | 2.79 | 0.71 | 4.24 | 3.61 |
| 3.06 | 6.6 | 10.1 | 1.13 | 2.19 | 2.66 | 0.91 | 4.94 | 3.52 |
| 3.16 | 6.9 | 10.2 | 1.03 | 2.08 | 2.73 | 1.20 | 1.84 | 3.11 |
| 3.16 | 6.8 | 9.9  | 1.03 | 1.39 | 2.39 | 0.93 | 4.14 | 5.65 |
| 3.31 | 6.6 | 10.1 | 0.96 | 2.26 | 2.91 | 0.78 | 2.01 | 3.54 |
| 3.16 | 6.8 | 10.6 | 1.03 | 1.79 | 2.73 | 0.84 | 2.43 | 1.59 |
| 3.16 | 6.8 | 10.5 | 1.08 | 1.98 | 1.82 | 0.93 | 2.81 | 1.96 |
| 3.26 | 6.7 | 9.5  | 1.03 | 2.02 | 2.50 | 1.17 | 1.64 | 2.70 |
| 3.12 | 6.9 | 10.3 | 1.03 | 2.02 | 2.53 | 0.78 | 2.00 | 1.66 |
| 3.36 | 6.5 | 9.9  | 0.91 | 1.90 | 2.51 | 1.44 | 1.66 | 2.79 |
| 3.30 | 6.6 | 10.0 | 0.96 | 1.71 | 2.67 | 1.00 | 3.08 | 4.44 |
| 3.23 | 6.3 | 10.2 | 1.11 | 1.73 | 2.69 | 0.95 | 1.68 | 2.37 |
| 3.46 | 6.7 | 10.3 | 1.00 | 1.90 | 2.68 | 1.00 | 2.37 | 3.30 |
| 3.26 | 6.6 | 10.3 | 0.96 | 1.70 | 2.81 | 1.17 | 1.47 | 3.76 |
| 3.31 | 6.3 | 10.2 | 1.03 | 1.74 | 2.86 | 1.01 | 2.81 | 4.03 |
| 2.91 | 6.8 | 10.3 | 1.11 | 1.99 | 1.98 | 1.23 | 0.92 | 3.25 |
| 3.46 | 6.8 | 10.3 | 1.08 | 1.90 | 2.33 | 0.92 | 3.00 | 0.83 |
| 3.40 | 6.9 | 10.3 | 1.19 | 2.06 | 2.82 | 1.34 | 2.04 | 2.71 |
| 3.17 | 6.6 | 10.1 | 1.11 | 1.54 | 2.18 | 1.17 | 2.26 | 5.61 |
| 3.41 | 6.7 | 10.2 | 1.03 | 1.70 | 2.67 | 1.05 | 4.68 | 3.18 |
| 3.36 | 6.7 | 9.5  | 0.91 | 1.82 | 2.70 | 0.95 | 2.42 | 2.70 |
| 3.17 | 6.9 | 10.0 | 1.07 | 1.87 | 2.53 | 1.35 | 2.99 | 6.26 |
| 3.01 | 6.7 | 10.3 | 0.79 | 1.98 | 2.70 | 1.46 | 3.22 | 1.92 |
| 3.40 | 6.8 | 9.1  | 1.03 | 2.10 | 2.33 | 0.96 | 0.96 | 5.37 |
| 3.36 | 6.7 | 3.4  | 1.15 | 1.98 | 2.26 | 1.45 | 2.10 | 2.44 |
| 3.31 | 6.7 | 1.4  | 1.07 | 1.94 | 1.82 | 0.82 | 2.17 | 3.66 |
| 3.40 | 6.7 | 10.3 | 1.07 | 1.90 | 2.73 | 1.43 | 3.28 | 2.89 |
| 3.11 | 6.6 | 9.8  | 1.16 | 1.62 | 1.54 | 0.95 | 0.78 | 2.52 |
| 3.24 | 6.9 | 10.0 | 0.79 | 1.90 | 2.89 | 0.94 | 3.23 | 1.42 |
| 3.38 | 6.5 | 9.7  | 1.16 | 1.33 | 2.73 | 0.99 | 1.81 | 4.00 |
| 3.31 | 6.8 | 10.4 | 0.91 | 1.98 | 2.68 | 1.17 | 1.23 | 3.23 |

|      |     |      |      |      |      |      |      |      |
|------|-----|------|------|------|------|------|------|------|
| 3.21 | 6.6 | 10.3 | 0.79 | 1.39 | 2.46 | 1.17 | 3.39 | 0.97 |
| 1.42 | 6.6 | 10.1 | 0.96 | 1.98 | 2.66 | 0.68 | 1.55 | 5.28 |
| 2.96 | 6.0 | 10.1 | 1.27 | 1.90 | 1.94 | 0.48 | 1.80 | 2.54 |
| 3.11 | 4.1 | 10.3 | 0.91 | 1.78 | 2.82 | 1.28 | 4.27 | 3.96 |
| 3.06 | 6.8 | 9.5  | 1.16 | 1.98 | 2.82 | 0.96 | 2.95 | 2.28 |
| 3.21 | 6.3 | 10.2 | 1.00 | 1.90 | 2.91 | 0.69 | 3.18 | 4.39 |
| 3.26 | 6.7 | 10.2 | 0.92 | 1.78 | 2.36 | 1.06 | 2.30 | 4.06 |
| 3.26 | 7.1 | 10.1 | 0.99 | 2.06 | 2.10 | 1.15 | 2.07 | 4.00 |
| 3.21 | 6.8 | 10.1 | 0.99 | 1.82 | 2.73 | 1.22 | 2.72 | 3.50 |
| 3.18 | 6.6 | 10.1 | 0.99 | 1.83 | 2.67 | 0.65 | 2.41 | 3.80 |
| 3.38 | 6.5 | 9.9  | 1.15 | 1.70 | 2.69 | 0.78 | 3.29 | 2.57 |
| 3.30 | 1.8 | 10.0 | 0.96 | 1.98 | 2.73 | 1.07 | 1.67 | 3.09 |
| 3.48 | 6.6 | 9.5  | 0.80 | 1.76 | 2.33 | 1.02 | 1.30 | 3.32 |
| 3.41 | 6.5 | 10.2 | 1.07 | 2.08 | 2.73 | 0.50 | 1.43 | 3.19 |
| 3.01 | 6.6 | 7.9  | 1.27 | 1.94 | 2.53 | 0.90 | 2.86 | 3.69 |
| 3.21 | 6.8 | 9.8  | 1.03 | 1.76 | 2.61 | 0.73 | 2.04 | 1.78 |
| 3.11 | 6.7 | 9.2  | 0.96 | 1.68 | 1.62 | 0.83 | 2.07 | 3.21 |
| 3.04 | 6.7 | 10.1 | 0.68 | 1.98 | 2.79 | 0.93 | 4.12 | 2.85 |
| 3.18 | 6.6 | 10.1 | 0.88 | 1.83 | 2.93 | 1.06 | 1.47 | 3.18 |
| 3.16 | 6.6 | 10.0 | 0.87 | 1.82 | 2.53 | 0.99 | 3.07 | 3.33 |
| 3.31 | 6.6 | 10.0 | 1.07 | 1.62 | 2.64 | 1.25 | 2.27 | 3.05 |
| 3.06 | 6.3 | 9.8  | 1.13 | 1.71 | 2.48 | 1.70 | 2.16 | 2.24 |
| 3.38 | 6.8 | 10.3 | 1.03 | 1.90 | 2.73 | 1.16 | 2.41 | 2.92 |
| 3.17 | 6.7 | 10.2 | 1.00 | 1.79 | 1.80 | 0.88 | 3.06 | 3.15 |
| 3.26 | 6.4 | 10.2 | 1.16 | 2.02 | 3.31 | 0.58 | 2.53 | 5.61 |
| 3.36 | 6.5 | 7.8  | 1.03 | 1.78 | 2.33 | 0.83 | 2.23 | 2.59 |
| 3.13 | 6.5 | 10.4 | 0.99 | 2.08 | 2.41 | 0.77 | 2.01 | 4.64 |
| 3.36 | 6.7 | 9.9  | 0.72 | 1.82 | 2.61 | 2.42 | 3.43 | 2.39 |
| 3.16 | 6.6 | 10.2 | 0.80 | 1.93 | 2.66 | 0.99 | 2.15 | 3.62 |
| 3.09 | 6.9 | 10.0 | 0.80 | 1.82 | 2.66 | 0.82 | 2.44 | 5.48 |
| 3.27 | 6.6 | 10.0 | 0.80 | 1.90 | 2.10 | 1.25 | 5.08 | 2.79 |
| 3.31 | 6.8 | 10.3 | 0.80 | 1.70 | 2.66 | 0.68 | 1.71 | 2.22 |
| 3.28 | 5.8 | 10.2 | 0.48 | 1.15 | 2.38 | 0.87 | 2.17 | 3.17 |
| 3.27 | 6.4 | 10.2 | 0.72 | 2.18 | 2.73 | 1.23 | 2.68 | 3.10 |
| 3.31 | 6.7 | 10.2 | 0.72 | 2.26 | 1.47 | 1.22 | 1.34 | 5.70 |

|      |     |      |      |      |      |      |      |      |
|------|-----|------|------|------|------|------|------|------|
| 3.06 | 6.6 | 5.0  | 0.72 | 2.30 | 2.81 | 0.75 | 2.52 | 2.17 |
| 3.11 | 6.4 | 9.6  | 0.56 | 2.22 | 2.89 | 0.89 | 2.26 | 2.01 |
| 3.30 | 6.3 | 9.7  | 0.72 | 2.19 | 2.50 | 1.34 | 2.60 | 2.46 |
| 3.29 | 6.6 | 8.5  | 0.72 | 2.18 | 2.93 | 1.13 | 2.39 | 5.14 |
| 2.81 | 6.7 | 9.3  | 0.48 | 2.02 | 1.08 | 0.85 | 2.60 | 3.74 |
| 2.84 | 6.3 | 9.8  | 0.72 | 2.02 | 2.81 | 0.78 | 1.58 | 2.61 |
| 2.67 | 6.3 | 10.1 | 0.72 | 2.22 | 2.39 | 1.15 | 4.00 | 4.45 |
| 2.80 | 6.3 | 3.2  | 0.72 | 1.99 | 2.86 | 1.07 | 1.53 | 3.52 |
| 2.41 | 5.1 | 4.9  | 0.68 | 1.67 | 2.81 | 0.60 | 3.28 | 2.55 |
| 2.41 | 6.6 | 9.2  | 0.48 | 2.10 | 1.82 | 0.97 | 2.83 | 1.99 |
| 2.69 | 6.5 | 10.0 | 0.72 | 2.42 | 0.99 | 0.90 | 1.78 | 2.67 |
| 2.74 | 6.7 | 10.3 | 0.72 | 2.30 | 2.66 | 0.67 | 2.78 | 3.98 |
| 3.11 | 6.8 | 9.9  | 0.68 | 2.07 | 2.73 | 1.01 | 2.09 | 1.74 |
| 3.21 | 6.3 | 9.8  | 0.68 | 2.19 | 2.36 | 0.72 | 1.57 | 2.44 |
| 3.01 | 6.0 | 9.7  | 0.68 | 2.30 | 2.27 | 0.56 | 1.99 | 5.68 |
| 3.31 | 6.6 | 10.2 | 0.72 | 2.26 | 2.61 | 0.51 | 2.23 | 2.43 |
| 3.26 | 6.5 | 10.6 | 0.80 | 2.02 | 2.98 | 1.10 | 2.28 | 2.06 |
| 3.36 | 6.7 | 10.2 | 0.68 | 1.94 | 2.62 | 0.83 | 5.62 | 4.35 |
| 3.21 | 6.5 | 10.2 | 0.72 | 1.90 | 2.46 | 0.84 | 2.09 | 0.87 |
| 3.21 | 5.1 | 9.8  | 0.72 | 2.02 | 2.73 | 0.42 | 0.97 | 3.16 |
| 3.21 | 6.5 | 10.1 | 0.80 | 1.90 | 2.66 | 0.62 | 3.38 | 3.66 |
| 3.16 | 6.9 | 10.3 | 0.72 | 1.99 | 2.66 | 1.88 | 2.42 | 2.83 |
| 3.06 | 6.9 | 8.8  | 0.68 | 2.22 | 2.39 | 1.22 | 2.50 | 3.80 |
| 3.31 | 6.7 | 9.7  | 1.11 | 1.90 | 2.73 | 0.80 | 2.44 | 1.86 |
| 3.39 | 6.0 | 9.2  | 1.16 | 1.82 | 2.79 | 0.67 | 2.72 | 2.86 |
| 3.16 | 6.1 | 9.7  | 1.05 | 1.87 | 2.89 | 1.56 | 1.65 | 1.50 |
| 2.93 | 2.0 | 6.3  | 1.00 | 2.00 | 2.89 | 0.55 | 2.17 | 4.38 |
| 3.39 | 6.8 | 10.3 | 0.99 | 2.02 | 2.82 | 0.88 | 1.50 | 3.23 |
| 3.23 | 5.8 | 9.1  | 1.11 | 2.10 | 2.30 | 0.67 | 2.79 | 2.74 |
| 3.27 | 5.8 | 10.2 | 1.16 | 2.14 | 2.66 | 0.51 | 3.00 | 3.04 |
| 3.24 | 6.6 | 9.9  | 0.96 | 2.10 | 2.78 | 0.46 | 2.79 | 3.15 |
| 3.36 | 6.9 | 10.4 | 1.25 | 2.10 | 2.89 | 1.10 | 1.79 | 2.44 |
| 3.23 | 6.6 | 8.8  | 0.91 | 1.94 | 2.66 | 0.99 | 2.92 | 1.80 |
| 3.26 | 6.4 | 8.4  | 1.07 | 2.14 | 2.62 | 0.45 | 2.23 | 2.35 |
| 2.97 | 6.7 | 10.5 | 1.03 | 2.02 | 2.13 | 2.07 | 1.54 | 6.41 |

|      |     |      |      |      |      |      |      |      |
|------|-----|------|------|------|------|------|------|------|
| 2.98 | 6.8 | 9.8  | 1.07 | 2.02 | 2.59 | 1.10 | 2.24 | 3.84 |
| 3.23 | 6.9 | 10.4 | 1.11 | 2.14 | 2.34 | 0.92 | 1.83 | 4.61 |
| 3.26 | 6.7 | 10.2 | 1.08 | 2.26 | 2.89 | 1.04 | 2.17 | 2.73 |
| 3.21 | 6.4 | 10.4 | 1.11 | 1.82 | 2.78 | 1.02 | 2.83 | 2.53 |
| 3.27 | 6.2 | 9.7  | 0.68 | 2.02 | 2.66 | 0.69 | 1.84 | 2.06 |
| 2.59 | 6.7 | 8.3  | 1.11 | 2.14 | 2.67 | 1.28 | 3.17 | 1.82 |
| 3.26 | 5.8 | 9.7  | 1.11 | 2.10 | 2.98 | 1.06 | 2.57 | 3.48 |
| 2.55 | 6.2 | 9.8  | 1.00 | 2.07 | 2.73 | 0.73 | 1.61 | 2.59 |
| 3.26 | 6.7 | 10.0 | 1.07 | 1.94 | 2.61 | 0.65 | 4.96 | 1.85 |
| 3.14 | 6.8 | 4.3  | 1.00 | 1.62 | 2.26 | 0.93 | 3.16 | 3.48 |
| 3.34 | 4.7 | 7.2  | 1.20 | 1.51 | 2.76 | 1.16 | 2.29 | 3.99 |
| 3.21 | 6.3 | 10.2 | 0.76 | 2.13 | 2.53 | 0.97 | 3.56 | 3.43 |
| 2.95 | 6.4 | 10.0 | 1.13 | 2.10 | 2.57 | 0.95 | 1.76 | 2.42 |
| 3.14 | 6.8 | 10.4 | 1.03 | 2.10 | 2.02 | 1.52 | 2.39 | 3.34 |
| 3.18 | 6.6 | 10.3 | 1.07 | 2.02 | 1.39 | 1.16 | 2.55 | 2.84 |
| 3.25 | 6.7 | 10.2 | 1.03 | 1.87 | 2.81 | 1.27 | 1.41 | 3.67 |
| 2.96 | 6.9 | 9.1  | 1.08 | 2.07 | 2.59 | 0.76 | 0.82 | 3.84 |
| 3.13 | 7.1 | 9.5  | 1.19 | 1.80 | 2.67 | 1.02 | 1.61 | 2.57 |
| 3.17 | 6.5 | 8.5  | 1.12 | 2.02 | 2.03 | 0.82 | 1.82 | 3.83 |
| 3.21 | 5.7 | 10.4 | 1.12 | 2.00 | 3.00 | 1.31 | 2.85 | 2.73 |
| 3.36 | 6.3 | 10.2 | 1.17 | 2.18 | 2.03 | 0.50 | 4.00 | 2.44 |
| 2.95 | 6.7 | 10.1 | 0.99 | 1.94 | 2.67 | 0.97 | 2.13 | 3.17 |
| 3.26 | 5.9 | 10.4 | 1.04 | 1.90 | 1.20 | 0.83 | 3.46 | 3.46 |
| 3.36 | 6.0 | 10.4 | 1.37 | 0.99 | 2.89 | 0.56 | 2.17 | 3.56 |
| 3.21 | 6.3 | 8.1  | 1.17 | 1.16 | 2.19 | 0.86 | 2.51 | 5.22 |
| 3.16 | 6.9 | 10.2 | 1.10 | 1.03 | 2.89 | 1.00 | 1.39 | 2.85 |
| 3.45 | 5.8 | 10.2 | 1.22 | 1.72 | 2.76 | 1.20 | 1.28 | 3.48 |
| 3.16 | 6.2 | 10.3 | 1.22 | 2.04 | 3.01 | 0.48 | 2.54 | 1.79 |
| 2.76 | 6.6 | 10.4 | 1.22 | 1.87 | 2.81 | 0.92 | 2.65 | 2.06 |
| 2.96 | 6.2 | 10.0 | 1.22 | 1.99 | 2.64 | 0.92 | 2.92 | 2.19 |
| 3.26 | 3.5 | 10.0 | 1.22 | 1.92 | 2.76 | 1.30 | 2.98 | 2.67 |
| 2.98 | 6.8 | 9.7  | 1.22 | 1.99 | 2.64 | 1.39 | 3.45 | 3.26 |
| 3.16 | 6.4 | 10.2 | 1.02 | 1.84 | 2.64 | 0.72 | 2.96 | 0.90 |
| 3.31 | 6.7 | 10.4 | 1.22 | 2.04 | 2.76 | 0.87 | 1.85 | 1.80 |
| 3.29 | 6.7 | 10.1 | 1.30 | 1.92 | 2.64 | 0.62 | 2.76 | 1.59 |

|      |     |      |      |      |      |      |      |      |
|------|-----|------|------|------|------|------|------|------|
| 2.89 | 6.7 | 10.4 | 1.22 | 1.87 | 1.34 | 0.79 | 1.68 | 0.51 |
| 3.31 | 6.5 | 9.9  | 1.14 | 1.79 | 2.69 | 1.06 | 3.62 | 2.01 |
| 2.85 | 6.6 | 10.2 | 1.14 | 1.87 | 2.76 | 1.11 | 3.23 | 3.50 |
| 2.60 | 5.7 | 10.4 | 0.99 | 1.79 | 2.69 | 0.85 | 1.93 | 3.20 |
| 2.63 | 6.7 | 10.6 | 0.99 | 1.79 | 2.24 | 2.09 | 4.63 | 2.32 |
| 3.27 | 6.7 | 10.4 | 1.02 | 1.84 | 2.76 | 0.46 | 1.89 | 3.94 |
| 3.31 | 6.7 | 9.6  | 1.10 | 1.84 | 2.56 | 2.89 | 2.97 | 3.72 |
| 3.27 | 6.7 | 9.9  | 1.02 | 1.92 | 2.24 | 0.93 | 2.44 | 4.72 |
| 3.22 | 6.7 | 10.2 | 0.97 | 2.04 | 2.52 | 0.75 | 1.15 | 3.78 |
| 2.99 | 5.1 | 10.1 | 1.02 | 1.59 | 2.81 | 1.13 | 6.50 | 4.52 |
| 3.16 | 6.5 | 9.3  | 1.10 | 1.79 | 2.32 | 1.59 | 2.96 | 2.37 |
| 3.19 | 6.6 | 9.1  | 1.10 | 1.87 | 2.61 | 1.89 | 1.99 | 3.77 |
| 3.22 | 6.4 | 8.2  | 1.02 | 1.92 | 2.49 | 0.82 | 2.48 | 4.23 |
| 3.16 | 6.6 | 9.6  | 1.02 | 1.84 | 2.64 | 0.95 | 2.24 | 2.82 |
| 3.27 | 6.6 | 6.3  | 1.02 | 1.79 | 2.56 | 0.67 | 2.59 | 2.83 |
| 3.26 | 6.7 | 10.1 | 1.02 | 1.99 | 2.76 | 1.38 | 2.74 | 2.98 |
| 3.36 | 6.7 | 8.4  | 0.57 | 1.87 | 1.87 | 0.67 | 3.08 | 1.71 |
| 3.12 | 6.3 | 10.1 | 1.22 | 1.59 | 2.56 | 0.99 | 2.06 | 3.80 |
| 3.06 | 6.5 | 9.6  | 0.90 | 1.79 | 2.49 | 0.78 | 5.76 | 3.22 |
| 2.72 | 6.6 | 9.0  | 0.70 | 1.74 | 2.56 | 1.34 | 3.41 | 3.52 |
| 2.30 | 6.4 | 10.0 | 1.02 | 1.99 | 2.16 | 0.61 | 4.18 | 3.71 |
| 2.76 | 6.6 | 10.2 | 0.97 | 1.92 | 2.61 | 1.20 | 0.90 | 3.23 |
| 3.39 | 6.5 | 10.3 | 1.04 | 1.02 | 2.44 | 0.56 | 1.72 | 4.68 |
| 2.95 | 6.7 | 10.5 | 0.90 | 1.79 | 2.64 | 1.17 | 4.43 | 7.86 |
| 3.06 | 6.7 | 10.1 | 0.90 | 1.54 | 2.49 | 0.89 | 0.82 | 3.34 |
| 3.21 | 5.8 | 10.2 | 1.10 | 1.87 | 2.69 | 0.67 | 2.18 | 3.64 |
| 3.27 | 6.1 | 10.0 | 1.02 | 1.79 | 2.69 | 1.61 | 2.69 | 3.17 |
| 3.00 | 6.5 | 10.2 | 1.10 | 1.34 | 2.52 | 1.58 | 1.00 | 3.76 |
| 2.67 | 6.8 | 10.3 | 0.77 | 1.79 | 2.81 | 1.25 | 0.71 | 3.16 |
| 3.36 | 6.5 | 9.9  | 1.07 | 1.74 | 1.92 | 0.84 | 2.56 | 3.94 |
| 3.27 | 6.8 | 9.5  | 0.77 | 1.62 | 2.89 | 1.22 | 2.76 | 3.53 |
| 3.27 | 6.8 | 9.7  | 1.02 | 1.79 | 1.87 | 0.78 | 2.48 | 4.08 |
| 3.21 | 6.2 | 10.2 | 0.97 | 1.62 | 1.72 | 1.45 | 2.39 | 3.16 |
| 3.14 | 5.6 | 9.6  | 1.17 | 1.84 | 1.87 | 0.80 | 2.19 | 3.66 |
| 2.49 | 6.4 | 9.5  | 1.30 | 1.67 | 1.74 | 0.75 | 1.56 | 2.45 |

|      |     |      |      |      |      |      |      |      |
|------|-----|------|------|------|------|------|------|------|
| 3.23 | 6.6 | 8.7  | 1.10 | 1.30 | 2.69 | 0.68 | 2.51 | 2.09 |
| 3.13 | 6.7 | 6.8  | 1.22 | 1.74 | 2.04 | 0.77 | 2.24 | 7.29 |
| 3.15 | 6.7 | 8.4  | 1.10 | 1.34 | 2.49 | 1.22 | 3.44 | 4.95 |
| 3.23 | 4.9 | 10.2 | 0.94 | 1.87 | 2.52 | 1.84 | 1.75 | 2.37 |
| 3.13 | 5.5 | 10.1 | 0.99 | 1.27 | 2.44 | 0.69 | 3.48 | 1.74 |
| 3.20 | 5.2 | 8.0  | 1.02 | 1.79 | 1.92 | 0.83 | 2.72 | 1.17 |
| 2.63 | 6.7 | 6.8  | 1.10 | 2.04 | 2.69 | 0.96 | 2.50 | 5.40 |
| 3.17 | 6.5 | 8.2  | 0.57 | 1.99 | 2.44 | 0.95 | 2.44 | 3.23 |
| 2.98 | 6.9 | 8.8  | 0.75 | 1.74 | 2.76 | 1.05 | 2.41 | 3.64 |
| 3.11 | 7.0 | 9.9  | 0.97 | 1.92 | 2.29 | 1.08 | 2.00 | 3.93 |
| 3.27 | 6.6 | 9.2  | 0.94 | 2.19 | 2.36 | 1.00 | 4.10 | 4.73 |
| 3.29 | 6.9 | 10.0 | 0.85 | 1.99 | 2.61 | 0.61 | 1.34 | 1.91 |
| 3.26 | 6.8 | 9.7  | 0.97 | 1.84 | 2.44 | 0.78 | 4.66 | 2.23 |
| 3.19 | 6.6 | 9.8  | 1.19 | 1.74 | 2.44 | 0.57 | 1.31 | 6.12 |
| 2.71 | 6.4 | 9.4  | 1.10 | 2.19 | 2.76 | 1.05 | 0.72 | 5.67 |
| 3.17 | 6.8 | 3.2  | 1.02 | 1.99 | 2.24 | 1.36 | 2.46 | 2.89 |
| 3.17 | 7.0 | 10.0 | 0.96 | 2.16 | 2.61 | 0.58 | 4.32 | 2.26 |
| 3.34 | 6.6 | 10.1 | 1.03 | 1.54 | 2.81 | 0.63 | 2.79 | 3.39 |
| 3.16 | 6.6 | 10.2 | 0.96 | 1.92 | 2.64 | 0.99 | 2.34 | 3.39 |
| 3.16 | 6.5 | 10.4 | 0.96 | 2.36 | 2.56 | 0.91 | 3.14 | 6.63 |
| 3.31 | 6.7 | 9.9  | 0.76 | 1.42 | 2.51 | 1.86 | 2.56 | 4.11 |
| 3.17 | 6.0 | 10.1 | 0.83 | 2.04 | 2.79 | 0.67 | 5.22 | 6.27 |
| 3.31 | 6.5 | 9.9  | 1.16 | 1.87 | 2.67 | 0.72 | 2.82 | 1.04 |
| 3.08 | 6.8 | 10.0 | 1.20 | 1.92 | 2.84 | 0.75 | 2.24 | 0.84 |
| 3.23 | 6.4 | 9.7  | 0.88 | 1.42 | 2.87 | 0.58 | 1.60 | 1.58 |
| 3.06 | 6.7 | 9.9  | 1.16 | 1.88 | 3.04 | 1.06 | 1.38 | 2.06 |
| 3.52 | 6.5 | 10.3 | 1.28 | 2.03 | 2.71 | 1.25 | 2.92 | 4.17 |
| 3.01 | 6.1 | 8.4  | 1.00 | 2.19 | 2.87 | 0.77 | 4.16 | 3.44 |
| 3.16 | 6.1 | 10.4 | 1.16 | 1.96 | 2.64 | 0.62 | 2.99 | 2.33 |
| 3.01 | 6.9 | 10.1 | 1.03 | 1.96 | 2.91 | 0.68 | 2.53 | 1.83 |
| 3.06 | 6.1 | 10.2 | 1.23 | 1.56 | 2.79 | 0.92 | 2.97 | 2.47 |
| 3.01 | 6.2 | 9.0  | 1.03 | 1.91 | 2.74 | 1.15 | 3.46 | 3.82 |
| 3.10 | 6.1 | 8.4  | 0.92 | 1.76 | 2.23 | 1.62 | 1.80 | 6.25 |
| 3.26 | 5.6 | 9.5  | 1.08 | 1.96 | 1.91 | 0.89 | 2.81 | 1.69 |
| 3.06 | 6.6 | 5.7  | 1.03 | 1.83 | 2.99 | 0.83 | 2.28 | 4.02 |

|      |     |      |      |      |      |      |      |      |
|------|-----|------|------|------|------|------|------|------|
| 3.06 | 5.6 | 10.4 | 0.96 | 1.76 | 2.84 | 1.12 | 6.91 | 2.50 |
| 2.93 | 6.7 | 9.8  | 1.08 | 1.96 | 2.31 | 1.17 | 1.99 | 2.32 |
| 3.10 | 5.1 | 9.2  | 1.03 | 2.11 | 2.71 | 0.83 | 3.21 | 2.18 |
| 3.22 | 4.8 | 9.8  | 1.08 | 2.08 | 2.56 | 1.40 | 4.18 | 3.64 |
| 2.76 | 4.4 | 8.7  | 0.96 | 1.48 | 2.82 | 0.92 | 3.30 | 3.73 |
| 2.74 | 6.7 | 10.4 | 0.88 | 1.36 | 2.67 | 1.06 | 2.52 | 2.34 |
| 2.06 | 6.3 | 9.7  | 1.03 | 1.96 | 2.87 | 0.91 | 2.34 | 2.70 |
| 2.07 | 6.8 | 10.1 | 0.88 | 1.96 | 2.99 | 1.06 | 1.17 | 1.62 |
| 3.44 | 6.8 | 8.8  | 0.83 | 1.83 | 2.36 | 0.67 | 4.68 | 3.23 |
| 2.28 | 6.9 | 10.1 | 0.96 | 1.36 | 2.82 | 2.11 | 2.07 | 2.30 |
| 2.86 | 6.6 | 10.0 | 1.00 | 1.83 | 2.84 | 1.04 | 2.69 | 5.38 |
| 2.74 | 6.4 | 8.2  | 1.00 | 1.96 | 2.64 | 1.54 | 1.39 | 3.70 |
| 3.04 | 6.7 | 8.5  | 1.16 | 1.96 | 1.93 | 0.79 | 1.67 | 6.72 |
| 2.71 | 6.4 | 10.0 | 1.00 | 2.11 | 2.64 | 1.06 | 1.89 | 2.88 |
| 3.29 | 6.8 | 10.3 | 0.96 | 1.76 | 2.64 | 0.83 | 2.08 | 4.22 |
| 3.23 | 6.8 | 7.9  | 1.03 | 1.51 | 2.67 | 1.02 | 3.04 | 3.37 |
| 3.36 | 5.0 | 10.3 | 0.96 | 1.73 | 2.79 | 1.05 | 4.53 | 2.99 |
| 3.23 | 6.9 | 10.1 | 1.10 | 1.88 | 2.84 | 0.95 | 1.78 | 5.51 |
| 3.52 | 6.6 | 10.2 | 1.20 | 1.91 | 2.71 | 1.03 | 2.19 | 2.29 |
| 3.61 | 6.9 | 9.8  | 1.00 | 1.88 | 2.56 | 1.12 | 1.78 | 2.93 |
| 3.17 | 6.7 | 8.5  | 0.88 | 1.83 | 2.91 | 0.67 | 4.58 | 3.86 |
| 3.60 | 6.6 | 9.9  | 1.23 | 1.71 | 2.71 | 1.57 | 5.32 | 2.22 |
| 3.47 | 6.7 | 9.2  | 1.16 | 1.96 | 2.60 | 1.36 | 2.85 | 2.48 |
| 3.29 | 6.5 | 10.2 | 1.03 | 1.96 | 2.64 | 1.82 | 2.36 | 2.81 |
| 3.56 | 7.0 | 9.9  | 1.08 | 1.91 | 3.00 | 0.85 | 3.26 | 2.32 |
| 3.27 | 6.6 | 9.9  | 1.00 | 1.83 | 2.51 | 1.20 | 2.70 | 4.01 |
| 3.36 | 6.6 | 10.2 | 0.96 | 2.11 | 2.79 | 1.11 | 1.63 | 6.13 |
| 3.42 | 5.7 | 9.3  | 1.20 | 2.16 | 2.59 | 1.38 | 2.99 | 1.65 |
| 3.31 | 5.9 | 10.0 | 0.88 | 1.76 | 2.39 | 1.29 | 2.08 | 7.05 |
| 3.42 | 6.9 | 5.3  | 0.96 | 1.91 | 2.71 | 1.56 | 1.49 | 2.79 |
| 2.61 | 6.9 | 3.1  | 0.96 | 1.63 | 2.64 | 1.17 | 1.40 | 2.59 |
| 3.23 | 6.6 | 3.3  | 0.96 | 1.71 | 2.56 | 1.22 | 2.31 | 3.59 |
| 3.31 | 6.5 | 9.7  | 0.96 | 1.76 | 2.44 | 0.74 | 2.25 | 5.81 |
| 3.42 | 6.7 | 9.9  | 1.00 | 1.83 | 2.64 | 0.95 | 0.90 | 1.94 |
| 3.26 | 6.2 | 9.7  | 1.17 | 1.56 | 2.84 | 1.20 | 1.28 | 4.09 |

|      |     |      |      |      |      |      |      |      |
|------|-----|------|------|------|------|------|------|------|
| 3.27 | 6.7 | 10.1 | 1.08 | 1.76 | 1.91 | 1.52 | 1.27 | 2.62 |
| 3.15 | 4.5 | 9.8  | 1.20 | 1.76 | 3.04 | 1.39 | 3.95 | 4.77 |
| 3.27 | 6.7 | 9.7  | 0.96 | 1.76 | 2.51 | 1.04 | 2.66 | 2.97 |
| 3.28 | 5.0 | 9.6  | 0.88 | 1.96 | 2.03 | 1.29 | 3.19 | 3.10 |
| 3.29 | 6.7 | 9.8  | 0.97 | 1.91 | 2.52 | 1.13 | 3.45 | 6.81 |
| 3.33 | 6.9 | 9.3  | 0.96 | 1.91 | 2.44 | 1.70 | 2.62 | 2.96 |
| 3.06 | 6.9 | 10.2 | 1.08 | 1.91 | 2.27 | 1.15 | 1.86 | 2.60 |
| 3.18 | 6.7 | 9.9  | 0.80 | 1.83 | 2.11 | 1.07 | 5.29 | 2.21 |
| 2.76 | 6.1 | 9.6  | 0.83 | 1.99 | 2.36 | 2.40 | 5.15 | 1.50 |
| 3.29 | 6.7 | 10.0 | 0.80 | 1.83 | 2.64 | 0.83 | 3.15 | 1.47 |
| 2.67 | 6.7 | 10.2 | 0.80 | 1.83 | 2.28 | 0.69 | 1.56 | 4.08 |
| 2.96 | 6.4 | 9.8  | 0.96 | 1.71 | 2.03 | 0.81 | 1.39 | 4.89 |
| 3.11 | 5.8 | 10.0 | 0.96 | 2.16 | 2.44 | 1.06 | 1.29 | 4.33 |
| 3.09 | 6.1 | 10.3 | 0.68 | 1.43 | 2.52 | 0.57 | 3.90 | 1.67 |
| 3.16 | 6.7 | 9.3  | 0.92 | 1.90 | 2.79 | 0.63 | 3.17 | 2.73 |
| 3.38 | 6.3 | 9.7  | 0.83 | 1.63 | 2.71 | 1.06 | 3.09 | 4.72 |
| 2.70 | 6.7 | 10.0 | 1.08 | 1.50 | 2.91 | 0.67 | 2.44 | 7.61 |
| 3.11 | 6.2 | 8.4  | 0.96 | 1.91 | 2.59 | 1.16 | 1.81 | 4.21 |
| 2.42 | 6.7 | 9.4  | 0.96 | 1.63 | 2.64 | 4.37 | 1.70 | 3.58 |
| 1.74 | 6.3 | 9.6  | 0.96 | 2.19 | 2.64 | 1.51 | 2.97 | 4.38 |
| 3.42 | 2.9 | 10.1 | 1.08 | 1.96 | 2.51 | 0.50 | 1.45 | 6.24 |
| 2.68 | 6.5 | 9.7  | 1.08 | 1.83 | 2.48 | 0.67 | 1.04 | 2.08 |
| 3.31 | 6.6 | 9.6  | 1.08 | 1.96 | 2.47 | 0.85 | 3.78 | 3.37 |
| 3.46 | 6.5 | 10.2 | 1.03 | 1.71 | 2.91 | 0.78 | 2.66 | 2.44 |
| 3.44 | 6.8 | 10.3 | 1.02 | 1.96 | 2.87 | 1.19 | 2.95 | 3.96 |
| 3.33 | 6.5 | 10.0 | 1.06 | 1.83 | 2.03 | 1.62 | 1.62 | 4.97 |
| 3.31 | 6.6 | 10.2 | 0.95 | 2.16 | 2.11 | 1.38 | 2.70 | 7.28 |
| 3.48 | 6.3 | 10.2 | 0.90 | 2.03 | 2.99 | 1.55 | 2.43 | 0.63 |
| 3.36 | 6.5 | 9.6  | 0.95 | 1.76 | 2.95 | 1.34 | 4.87 | 2.31 |
| 3.43 | 6.4 | 10.0 | 1.02 | 1.56 | 2.91 | 1.28 | 2.84 | 2.01 |
| 3.31 | 6.7 | 9.8  | 0.95 | 2.03 | 2.75 | 1.07 | 2.41 | 5.55 |
| 3.46 | 6.5 | 10.0 | 1.18 | 1.83 | 2.83 | 0.81 | 2.67 | 3.95 |
| 3.33 | 6.7 | 10.0 | 1.10 | 1.83 | 2.83 | 1.84 | 2.71 | 3.21 |
| 3.42 | 6.7 | 9.5  | 0.90 | 1.16 | 2.91 | 1.25 | 5.89 | 2.28 |
| 3.23 | 6.6 | 7.1  | 1.10 | 1.36 | 2.95 | 1.06 | 1.34 | 3.99 |

|      |     |      |      |      |      |      |      |      |
|------|-----|------|------|------|------|------|------|------|
| 3.41 | 6.2 | 9.4  | 1.10 | 2.28 | 2.91 | 1.19 | 2.65 | 5.72 |
| 3.46 | 6.6 | 10.1 | 0.67 | 2.16 | 2.91 | 0.67 | 2.33 | 2.18 |
| 3.46 | 6.6 | 9.4  | 0.98 | 2.24 | 3.07 | 1.19 | 2.59 | 2.29 |
| 3.42 | 6.7 | 9.0  | 0.90 | 2.32 | 2.75 | 1.23 | 1.39 | 2.36 |
| 3.35 | 6.8 | 9.0  | 1.02 | 2.24 | 2.99 | 1.34 | 4.40 | 4.06 |
| 3.41 | 6.9 | 9.6  | 1.10 | 2.32 | 2.95 | 1.17 | 3.85 | 3.60 |
| 3.21 | 6.6 | 9.8  | 1.06 | 2.16 | 3.15 | 1.19 | 2.23 | 1.62 |
| 3.46 | 6.7 | 7.1  | 1.14 | 2.36 | 0.75 | 0.79 | 2.81 | 3.36 |
| 3.48 | 6.6 | 3.1  | 1.34 | 2.16 | 2.91 | 1.39 | 2.60 | 3.06 |
| 3.13 | 6.2 | 4.1  | 1.06 | 2.01 | 2.99 | 1.17 | 3.63 | 2.17 |
| 3.07 | 6.7 | 10.4 | 0.94 | 2.16 | 2.68 | 1.25 | 3.03 | 3.77 |
| 3.48 | 6.7 | 10.0 | 1.10 | 1.89 | 2.75 | 1.28 | 2.65 | 3.31 |
| 3.36 | 7.2 | 9.9  | 1.06 | 1.45 | 2.91 | 1.19 | 4.35 | 2.24 |
| 3.31 | 6.6 | 10.1 | 0.90 | 2.16 | 2.83 | 1.25 | 2.10 | 3.95 |
| 3.33 | 6.7 | 9.9  | 1.10 | 2.01 | 2.99 | 1.67 | 3.50 | 2.21 |
| 3.38 | 6.6 | 10.0 | 1.06 | 2.32 | 2.83 | 1.17 | 1.54 | 3.56 |
| 3.21 | 6.5 | 8.3  | 0.75 | 1.93 | 2.75 | 1.23 | 2.81 | 4.76 |
| 3.20 | 6.9 | 9.7  | 1.22 | 1.85 | 2.91 | 1.50 | 1.31 | 1.62 |
| 3.21 | 6.7 | 9.9  | 1.02 | 2.36 | 2.83 | 0.99 | 1.29 | 3.58 |
| 3.26 | 6.6 | 10.1 | 0.98 | 2.16 | 2.60 | 0.73 | 1.25 | 2.79 |
| 3.42 | 6.1 | 10.0 | 1.26 | 2.24 | 3.03 | 1.28 | 1.73 | 2.63 |
| 3.42 | 5.7 | 10.0 | 1.06 | 2.16 | 1.06 | 1.41 | 1.00 | 3.11 |
| 2.58 | 6.6 | 9.9  | 0.95 | 2.32 | 2.75 | 1.50 | 1.67 | 3.82 |
| 3.26 | 5.3 | 10.1 | 1.06 | 2.24 | 2.91 | 1.11 | 2.64 | 2.59 |
| 3.30 | 6.1 | 7.9  | 1.06 | 2.01 | 1.57 | 1.00 | 1.85 | 2.53 |
| 3.42 | 6.5 | 10.2 | 0.90 | 2.95 | 2.91 | 1.02 | 3.36 | 0.50 |
| 3.42 | 6.8 | 10.0 | 0.98 | 2.24 | 2.99 | 1.22 | 2.82 | 5.60 |
| 3.41 | 6.5 | 10.1 | 0.98 | 2.36 | 2.56 | 1.30 | 3.87 | 5.19 |
| 2.94 | 6.5 | 9.6  | 0.79 | 2.04 | 2.52 | 1.20 | 3.04 | 4.16 |
| 3.53 | 6.6 | 10.0 | 1.02 | 2.09 | 2.99 | 1.03 | 3.68 | 4.51 |
| 3.33 | 6.6 | 10.2 | 0.95 | 2.32 | 2.32 | 1.22 | 1.02 | 4.60 |
| 3.27 | 6.4 | 9.7  | 0.98 | 2.28 | 2.56 | 1.27 | 3.28 | 2.82 |
| 3.42 | 6.2 | 10.2 | 0.98 | 2.32 | 3.22 | 1.62 | 2.26 | 3.30 |
| 3.27 | 6.5 | 10.2 | 1.02 | 2.24 | 1.49 | 1.35 | 3.94 | 1.53 |
| 2.92 | 4.9 | 8.4  | 0.94 | 2.24 | 3.07 | 0.46 | 3.26 | 3.15 |

|      |     |      |      |      |      |      |      |      |
|------|-----|------|------|------|------|------|------|------|
| 3.16 | 6.8 | 7.4  | 1.02 | 2.24 | 2.24 | 0.79 | 1.50 | 5.15 |
| 3.48 | 6.7 | 8.1  | 1.06 | 1.93 | 2.83 | 1.96 | 1.59 | 4.20 |
| 2.34 | 6.6 | 9.5  | 0.98 | 2.09 | 2.71 | 0.78 | 1.53 | 2.52 |
| 2.72 | 6.7 | 10.1 | 0.98 | 2.71 | 2.63 | 0.89 | 3.42 | 1.34 |
| 3.12 | 6.5 | 9.8  | 0.79 | 1.49 | 2.83 | 0.96 | 3.29 | 1.20 |
| 3.04 | 6.7 | 10.1 | 1.30 | 1.85 | 2.83 | 0.56 | 3.33 | 3.10 |
| 3.16 | 5.4 | 9.9  | 1.14 | 2.16 | 2.48 | 1.06 | 1.90 | 3.62 |
| 1.89 | 6.5 | 10.3 | 1.06 | 2.09 | 2.32 | 0.99 | 4.36 | 3.97 |
| 2.91 | 6.5 | 9.1  | 0.90 | 2.09 | 2.56 | 0.99 | 3.08 | 3.66 |
| 3.16 | 6.8 | 10.2 | 0.95 | 2.09 | 2.68 | 1.13 | 1.95 | 2.56 |
| 3.06 | 6.6 | 10.3 | 0.75 | 2.24 | 1.85 | 1.13 | 3.54 | 1.35 |
| 3.26 | 6.5 | 10.2 | 1.06 | 2.16 | 2.68 | 0.59 | 2.81 | 2.17 |
| 1.81 | 6.5 | 9.6  | 0.94 | 1.93 | 2.91 | 1.24 | 3.17 | 4.50 |
| 3.21 | 7.0 | 9.2  | 1.06 | 2.16 | 2.75 | 1.61 | 1.95 | 3.88 |
| 3.44 | 4.8 | 9.7  | 1.15 | 1.97 | 3.11 | 1.07 | 1.90 | 2.78 |
| 3.24 | 6.3 | 10.1 | 1.15 | 1.93 | 2.40 | 1.36 | 3.10 | 3.42 |
| 3.38 | 6.7 | 8.0  | 1.15 | 1.93 | 2.56 | 0.72 | 1.18 | 4.50 |
| 3.27 | 6.8 | 8.9  | 0.95 | 2.01 | 2.84 | 0.77 | 1.32 | 3.20 |
| 3.61 | 6.6 | 9.9  | 0.87 | 1.93 | 2.40 | 0.78 | 2.13 | 5.10 |
| 3.26 | 6.5 | 10.2 | 0.87 | 1.89 | 2.64 | 0.77 | 2.73 | 3.93 |
| 3.38 | 6.4 | 10.1 | 1.02 | 1.89 | 2.56 | 1.36 | 4.52 | 0.60 |
| 3.44 | 6.3 | 10.2 | 1.02 | 1.66 | 2.68 | 0.67 | 1.69 | 1.42 |
| 3.06 | 6.0 | 10.4 | 0.95 | 1.85 | 2.48 | 0.97 | 2.79 | 2.70 |
| 3.01 | 6.8 | 10.4 | 1.15 | 2.13 | 2.40 | 1.28 | 3.31 | 2.89 |
| 3.27 | 6.7 | 10.1 | 1.15 | 1.89 | 2.48 | 2.66 | 3.24 | 2.67 |
| 3.25 | 6.8 | 10.3 | 1.02 | 1.93 | 2.68 | 1.73 | 3.49 | 3.86 |
| 3.26 | 6.7 | 10.0 | 1.02 | 2.13 | 2.21 | 1.03 | 1.94 | 2.60 |
| 3.31 | 6.8 | 9.7  | 1.34 | 1.46 | 2.56 | 2.14 | 2.41 | 2.39 |
| 3.02 | 6.6 | 10.6 | 0.98 | 1.77 | 2.13 | 0.96 | 2.59 | 5.82 |
| 3.23 | 6.7 | 9.6  | 1.07 | 1.46 | 2.28 | 0.77 | 3.18 | 3.66 |
| 3.42 | 6.8 | 9.9  | 1.10 | 1.74 | 2.80 | 1.15 | 3.01 | 2.02 |
| 3.30 | 6.6 | 10.1 | 1.15 | 1.85 | 2.40 | 0.67 | 3.45 | 4.04 |
| 2.66 | 6.4 | 10.2 | 1.02 | 1.77 | 2.56 | 1.15 | 3.06 | 4.17 |
| 3.40 | 6.7 | 10.4 | 1.15 | 1.69 | 2.56 | 1.82 | 2.40 | 2.97 |
| 3.29 | 6.8 | 8.7  | 0.98 | 1.77 | 2.56 | 0.97 | 3.09 | 3.88 |

|      |     |      |      |      |      |      |      |      |
|------|-----|------|------|------|------|------|------|------|
| 3.19 | 6.5 | 10.6 | 1.18 | 1.62 | 2.04 | 1.19 | 3.88 | 4.52 |
| 3.28 | 6.8 | 9.0  | 1.10 | 1.85 | 2.64 | 0.65 | 3.29 | 2.41 |
| 3.16 | 6.7 | 10.3 | 1.02 | 1.81 | 2.36 | 1.27 | 3.81 | 5.66 |
| 3.27 | 6.6 | 10.5 | 0.95 | 1.97 | 2.84 | 1.08 | 1.61 | 2.17 |
| 3.20 | 6.7 | 9.8  | 1.15 | 1.34 | 2.56 | 0.83 | 2.54 | 3.73 |
| 3.01 | 5.1 | 10.1 | 1.02 | 1.81 | 2.64 | 1.02 | 1.34 | 5.48 |
| 3.27 | 5.4 | 10.6 | 1.07 | 1.85 | 2.16 | 1.17 | 2.81 | 2.76 |
| 3.31 | 6.5 | 9.0  | 1.02 | 1.81 | 2.92 | 1.02 | 2.67 | 2.30 |
| 3.01 | 6.9 | 9.8  | 1.02 | 1.77 | 2.64 | 0.96 | 3.43 | 4.73 |
| 3.12 | 5.6 | 10.2 | 1.02 | 1.81 | 2.64 | 0.77 | 3.28 | 3.86 |
| 3.26 | 6.3 | 10.2 | 1.02 | 1.81 | 2.33 | 0.50 | 2.95 | 3.57 |
| 2.90 | 6.7 | 10.4 | 1.15 | 2.13 | 2.76 | 1.07 | 2.29 | 4.48 |
| 3.31 | 5.8 | 10.2 | 1.15 | 1.81 | 2.21 | 0.81 | 2.19 | 1.95 |
| 3.23 | 6.3 | 10.2 | 1.02 | 1.97 | 2.64 | 1.11 | 2.72 | 2.18 |
| 3.27 | 6.2 | 10.4 | 1.02 | 1.46 | 2.68 | 0.67 | 2.76 | 2.67 |
| 3.16 | 6.6 | 10.2 | 1.18 | 1.85 | 2.87 | 0.48 | 1.88 | 3.22 |
| 2.88 | 6.7 | 9.2  | 1.02 | 1.54 | 2.76 | 0.83 | 3.02 | 4.25 |
| 3.16 | 6.6 | 9.8  | 1.15 | 2.13 | 2.24 | 0.68 | 1.17 | 4.94 |
| 3.21 | 6.4 | 9.8  | 0.87 | 1.93 | 2.56 | 0.79 | 2.96 | 4.08 |
| 3.36 | 6.4 | 9.1  | 1.10 | 1.93 | 2.36 | 0.78 | 0.67 | 2.95 |
| 3.32 | 6.3 | 7.8  | 1.02 | 1.93 | 2.48 | 1.10 | 2.34 | 2.88 |
| 2.67 | 6.0 | 9.4  | 0.87 | 1.69 | 2.05 | 1.24 | 2.80 | 3.93 |
| 3.21 | 6.7 | 9.6  | 0.86 | 1.62 | 1.77 | 0.84 | 2.18 | 3.91 |
| 3.31 | 6.4 | 3.8  | 1.02 | 1.93 | 2.64 | 1.30 | 3.88 | 2.54 |
| 3.15 | 6.7 | 5.6  | 1.22 | 2.13 | 2.56 | 0.68 | 5.04 | 2.88 |
| 2.71 | 6.6 | 9.1  | 0.63 | 2.13 | 2.48 | 1.10 | 3.05 | 3.11 |
| 3.04 | 6.7 | 10.1 | 1.18 | 2.17 | 1.18 | 1.28 | 4.22 | 4.23 |
| 1.92 | 6.8 | 9.1  | 0.95 | 1.97 | 2.72 | 0.45 | 1.31 | 3.93 |
| 2.37 | 5.7 | 9.7  | 1.10 | 2.05 | 2.76 | 1.11 | 3.04 | 3.07 |
| 3.32 | 6.6 | 10.4 | 0.98 | 1.77 | 2.63 | 0.96 | 3.24 | 3.18 |
| 3.41 | 4.7 | 10.3 | 0.94 | 1.61 | 2.60 | 0.70 | 1.30 | 3.78 |
| 3.21 | 6.4 | 9.9  | 1.10 | 1.97 | 2.52 | 0.89 | 2.28 | 3.80 |
| 3.26 | 6.6 | 9.7  | 1.02 | 1.74 | 2.68 | 0.75 | 1.73 | 2.85 |
| 3.27 | 6.9 | 10.3 | 1.10 | 1.77 | 2.72 | 1.17 | 1.82 | 4.03 |
| 3.40 | 6.3 | 9.8  | 1.02 | 1.62 | 2.44 | 0.90 | 1.78 | 4.01 |

|      |     |      |      |      |      |      |      |      |
|------|-----|------|------|------|------|------|------|------|
| 3.25 | 6.0 | 8.5  | 1.30 | 1.77 | 2.59 | 1.06 | 2.22 | 3.92 |
| 3.27 | 6.4 | 9.6  | 1.02 | 1.69 | 2.92 | 0.78 | 2.24 | 5.30 |
| 3.44 | 6.5 | 10.2 | 1.10 | 1.54 | 2.87 | 1.56 | 1.30 | 2.24 |
| 3.43 | 6.7 | 10.1 | 1.26 | 1.54 | 2.64 | 1.20 | 2.19 | 4.28 |
| 3.38 | 6.7 | 10.4 | 0.87 | 1.69 | 2.56 | 1.20 | 3.42 | 4.41 |
| 3.27 | 6.7 | 10.2 | 1.02 | 2.05 | 2.48 | 1.81 | 3.44 | 1.70 |
| 3.06 | 6.8 | 9.8  | 1.15 | 1.85 | 2.64 | 0.87 | 2.64 | 2.28 |
| 3.10 | 5.9 | 10.4 | 0.86 | 2.05 | 2.68 | 1.06 | 2.28 | 3.56 |
| 3.31 | 6.1 | 10.1 | 1.10 | 1.81 | 2.33 | 0.73 | 1.62 | 2.78 |
| 3.26 | 6.7 | 10.3 | 1.18 | 1.77 | 2.64 | 0.59 | 2.41 | 3.00 |
| 3.31 | 6.3 | 9.9  | 1.02 | 2.05 | 2.48 | 1.17 | 2.60 | 3.16 |
| 3.29 | 6.8 | 10.2 | 0.95 | 1.62 | 2.68 | 2.40 | 3.29 | 1.81 |
| 2.97 | 6.1 | 10.3 | 1.10 | 1.89 | 2.92 | 1.30 | 3.53 | 0.63 |
| 3.24 | 6.7 | 10.4 | 1.18 | 1.89 | 2.56 | 0.56 | 2.65 | 0.68 |
| 3.13 | 6.9 | 9.2  | 1.14 | 1.89 | 2.68 | 0.45 | 2.96 | 2.76 |
| 2.87 | 6.7 | 9.8  | 0.94 | 1.77 | 2.64 | 1.22 | 2.06 | 1.64 |
| 3.31 | 6.4 | 10.0 | 1.15 | 2.13 | 2.56 | 0.84 | 2.18 | 2.28 |
| 3.27 | 6.1 | 10.0 | 0.87 | 2.13 | 2.21 | 0.62 | 2.68 | 4.09 |
| 3.17 | 6.5 | 10.4 | 0.98 | 1.97 | 1.89 | 0.56 | 2.85 | 2.71 |
| 3.27 | 6.5 | 10.0 | 1.02 | 1.81 | 2.09 | 0.72 | 1.96 | 3.78 |
| 3.27 | 6.9 | 9.7  | 1.02 | 1.66 | 2.68 | 0.76 | 1.67 | 2.90 |
| 3.16 | 6.5 | 9.7  | 1.15 | 1.97 | 2.13 | 0.84 | 2.03 | 4.73 |
| 3.21 | 3.5 | 10.2 | 1.25 | 1.81 | 2.68 | 0.83 | 3.19 | 1.76 |
| 3.27 | 6.7 | 10.1 | 1.11 | 1.74 | 2.56 | 0.97 | 3.02 | 3.47 |
| 3.30 | 6.6 | 9.8  | 1.11 | 1.54 | 2.76 | 1.04 | 1.54 | 2.80 |
| 2.96 | 6.6 | 10.3 | 1.11 | 1.74 | 2.72 | 0.72 | 3.11 | 3.71 |
| 3.23 | 6.9 | 10.0 | 1.23 | 1.58 | 2.40 | 1.06 | 1.37 | 4.10 |
| 3.25 | 6.9 | 10.1 | 1.20 | 1.65 | 2.59 | 1.32 | 3.62 | 3.64 |
| 3.14 | 6.5 | 9.9  | 0.96 | 1.10 | 2.70 | 1.10 | 2.72 | 3.85 |
| 3.01 | 6.4 | 9.3  | 0.76 | 1.83 | 2.59 | 0.89 | 2.67 | 3.14 |
| 3.23 | 6.7 | 9.3  | 1.16 | 2.13 | 2.70 | 1.34 | 2.21 | 1.52 |
| 3.21 | 6.5 | 9.3  | 1.31 | 1.71 | 1.91 | 0.45 | 1.76 | 4.50 |
| 3.16 | 5.6 | 4.1  | 1.23 | 1.99 | 2.51 | 1.10 | 1.69 | 4.65 |
| 3.11 | 6.7 | 10.1 | 0.88 | 1.65 | 2.34 | 0.67 | 1.52 | 3.84 |
| 3.16 | 6.7 | 10.3 | 0.96 | 2.11 | 2.67 | 1.07 | 2.24 | 3.62 |

|      |     |      |      |      |      |      |      |      |
|------|-----|------|------|------|------|------|------|------|
| 3.42 | 6.7 | 10.4 | 0.88 | 2.11 | 2.90 | 1.03 | 1.30 | 1.81 |
| 3.56 | 6.6 | 10.2 | 0.88 | 2.67 | 2.82 | 1.47 | 2.45 | 3.87 |
| 2.86 | 6.4 | 10.0 | 1.05 | 2.07 | 1.99 | 1.28 | 2.53 | 2.00 |
| 2.88 | 6.7 | 10.1 | 1.03 | 1.71 | 2.27 | 0.56 | 2.17 | 3.66 |
| 2.47 | 6.9 | 10.2 | 0.88 | 1.91 | 2.57 | 1.06 | 2.19 | 2.82 |
| 3.04 | 6.1 | 9.9  | 1.03 | 1.79 | 2.87 | 0.93 | 1.32 | 3.59 |
| 2.91 | 6.7 | 10.2 | 1.11 | 2.19 | 2.75 | 1.13 | 3.26 | 3.05 |
| 2.58 | 6.5 | 10.2 | 1.39 | 2.07 | 2.59 | 0.79 | 2.02 | 3.36 |
| 2.72 | 6.8 | 10.0 | 1.08 | 2.11 | 2.47 | 0.99 | 1.28 | 2.19 |
| 2.69 | 6.4 | 10.1 | 1.03 | 1.99 | 2.67 | 1.03 | 3.07 | 4.12 |
| 2.86 | 6.7 | 9.5  | 0.96 | 1.79 | 2.75 | 0.63 | 2.09 | 1.93 |
| 2.99 | 6.6 | 10.2 | 1.08 | 2.03 | 2.53 | 1.50 | 3.30 | 4.60 |
| 2.26 | 6.7 | 9.9  | 1.16 | 2.07 | 2.54 | 1.31 | 1.40 | 2.60 |
| 2.96 | 6.7 | 10.4 | 1.00 | 1.94 | 2.67 | 1.13 | 0.63 | 1.02 |
| 3.01 | 6.6 | 10.1 | 0.88 | 1.91 | 2.67 | 0.78 | 2.87 | 2.82 |
| 2.84 | 6.7 | 10.0 | 1.08 | 1.94 | 2.54 | 1.13 | 3.60 | 2.62 |
| 3.27 | 6.5 | 10.3 | 1.08 | 2.07 | 2.82 | 0.95 | 2.86 | 4.38 |
| 3.38 | 6.6 | 10.4 | 1.23 | 1.87 | 2.62 | 1.02 | 2.70 | 1.62 |
| 3.11 | 5.7 | 9.2  | 0.91 | 1.79 | 2.67 | 1.13 | 2.17 | 3.04 |
| 3.33 | 6.6 | 10.2 | 0.91 | 1.83 | 2.59 | 1.06 | 3.40 | 2.96 |
| 3.16 | 6.5 | 10.1 | 1.05 | 1.91 | 3.02 | 1.03 | 2.08 | 2.71 |
| 2.96 | 6.7 | 10.0 | 1.00 | 1.80 | 2.75 | 1.27 | 3.90 | 2.22 |
| 3.20 | 6.7 | 10.5 | 1.16 | 1.83 | 2.64 | 1.06 | 2.57 | 0.59 |
| 2.92 | 6.9 | 10.0 | 1.16 | 2.07 | 2.71 | 0.83 | 2.09 | 3.72 |
| 3.10 | 6.3 | 10.1 | 1.23 | 1.99 | 2.19 | 1.22 | 3.69 | 4.57 |
| 3.01 | 6.7 | 10.3 | 1.03 | 2.19 | 2.67 | 0.73 | 2.06 | 2.50 |
| 3.42 | 6.6 | 9.8  | 1.03 | 2.11 | 2.82 | 1.08 | 2.42 | 2.75 |
| 3.30 | 6.6 | 9.9  | 1.08 | 2.07 | 2.60 | 1.16 | 4.13 | 6.91 |
| 3.21 | 6.1 | 10.3 | 1.08 | 1.83 | 2.62 | 0.95 | 2.92 | 4.27 |
| 3.31 | 6.5 | 9.6  | 0.97 | 1.71 | 2.34 | 1.28 | 2.89 | 4.01 |
| 3.31 | 6.1 | 10.1 | 1.16 | 1.71 | 2.54 | 0.91 | 2.44 | 2.89 |
| 3.33 | 5.9 | 9.8  | 1.16 | 1.87 | 2.65 | 0.78 | 2.04 | 1.36 |
| 3.15 | 6.6 | 10.2 | 1.11 | 1.97 | 2.75 | 1.06 | 3.84 | 2.84 |
| 3.33 | 6.3 | 10.4 | 1.08 | 1.79 | 2.75 | 1.07 | 1.68 | 3.48 |
| 3.15 | 6.6 | 10.2 | 1.03 | 1.83 | 2.67 | 1.06 | 3.29 | 4.46 |

|      |     |      |      |      |      |      |      |      |
|------|-----|------|------|------|------|------|------|------|
| 3.34 | 6.7 | 10.1 | 0.96 | 1.71 | 2.39 | 1.16 | 2.02 | 3.98 |
| 3.26 | 6.7 | 8.2  | 0.83 | 1.94 | 2.67 | 1.15 | 2.52 | 1.71 |
| 3.27 | 6.3 | 9.9  | 1.00 | 1.79 | 2.51 | 1.61 | 1.74 | 0.57 |
| 2.53 | 6.8 | 10.1 | 1.17 | 2.03 | 2.54 | 0.77 | 3.26 | 3.49 |
| 2.91 | 6.5 | 10.2 | 0.96 | 1.91 | 2.59 | 0.57 | 3.67 | 2.97 |
| 3.17 | 6.6 | 10.0 | 0.88 | 2.07 | 2.62 | 1.11 | 2.66 | 2.61 |
| 3.27 | 6.9 | 10.2 | 0.96 | 2.11 | 2.19 | 0.97 | 2.59 | 2.71 |
| 3.16 | 6.5 | 10.3 | 1.03 | 1.99 | 2.62 | 1.13 | 3.45 | 1.06 |
| 3.17 | 6.7 | 10.1 | 1.11 | 1.94 | 2.51 | 0.39 | 1.74 | 2.71 |
| 3.26 | 6.7 | 10.5 | 0.83 | 1.91 | 2.39 | 0.73 | 2.88 | 4.41 |
| 3.25 | 6.2 | 10.5 | 0.91 | 1.96 | 2.47 | 1.54 | 1.98 | 2.64 |
| 3.36 | 6.5 | 10.4 | 0.79 | 2.07 | 2.67 | 1.45 | 2.75 | 3.45 |
| 3.12 | 6.6 | 9.8  | 0.79 | 1.91 | 2.87 | 0.87 | 2.18 | 4.50 |
| 3.38 | 6.5 | 10.1 | 0.79 | 1.99 | 2.82 | 0.68 | 1.62 | 3.95 |
| 3.13 | 6.9 | 10.4 | 1.22 | 1.83 | 2.68 | 0.80 | 2.17 | 3.09 |
| 3.23 | 6.4 | 10.1 | 0.95 | 1.76 | 2.77 | 1.99 | 0.94 | 1.34 |
| 2.71 | 6.7 | 9.9  | 0.96 | 1.94 | 2.65 | 1.11 | 2.71 | 1.21 |
| 1.83 | 6.6 | 10.2 | 1.23 | 1.79 | 2.69 | 0.97 | 2.79 | 1.87 |
| 3.16 | 6.7 | 10.2 | 1.02 | 1.91 | 2.70 | 1.09 | 0.80 | 2.66 |
| 3.19 | 6.1 | 8.3  | 1.10 | 1.86 | 2.56 | 1.30 | 2.07 | 3.84 |
| 3.31 | 6.3 | 9.3  | 0.90 | 1.87 | 2.42 | 1.75 | 2.79 | 4.96 |
| 3.36 | 6.6 | 10.0 | 0.99 | 1.87 | 2.54 | 1.00 | 1.68 | 4.30 |
| 3.26 | 6.6 | 10.3 | 0.88 | 1.87 | 2.57 | 1.15 | 4.49 | 2.64 |
| 3.08 | 6.7 | 10.3 | 1.10 | 1.86 | 2.72 | 0.71 | 2.31 | 3.53 |
| 3.15 | 6.5 | 10.5 | 1.34 | 1.89 | 2.50 | 0.85 | 0.77 | 2.09 |
| 3.09 | 6.7 | 8.8  | 1.07 | 1.93 | 2.78 | 1.13 | 2.05 | 5.52 |
| 2.09 | 6.4 | 10.3 | 0.96 | 1.97 | 2.70 | 0.97 | 2.94 | 1.77 |
| 1.94 | 6.5 | 10.3 | 1.31 | 1.71 | 2.92 | 2.17 | 2.51 | 3.68 |
| 3.31 | 6.6 | 10.0 | 1.10 | 1.86 | 2.65 | 1.15 | 3.42 | 2.72 |
| 3.19 | 6.7 | 9.7  | 1.07 | 1.74 | 2.70 | 1.84 | 2.09 | 2.77 |
| 3.23 | 6.6 | 10.1 | 1.19 | 2.06 | 2.70 | 1.48 | 2.17 | 1.99 |
| 3.31 | 6.4 | 10.1 | 1.15 | 2.13 | 1.27 | 0.72 | 1.53 | 1.18 |
| 3.31 | 6.7 | 9.6  | 0.99 | 2.02 | 1.62 | 1.08 | 1.61 | 2.51 |
| 3.26 | 6.9 | 10.3 | 1.15 | 2.14 | 2.75 | 0.68 | 2.01 | 4.23 |
| 3.26 | 6.6 | 10.0 | 1.22 | 1.87 | 2.77 | 0.91 | 1.31 | 3.99 |

|      |     |      |      |      |      |      |      |      |
|------|-----|------|------|------|------|------|------|------|
| 3.22 | 6.4 | 7.9  | 1.11 | 1.94 | 2.70 | 0.95 | 1.85 | 2.76 |
| 3.16 | 6.5 | 10.1 | 0.91 | 1.58 | 2.80 | 0.65 | 2.99 | 4.43 |
| 3.23 | 6.0 | 9.7  | 1.02 | 1.79 | 2.65 | 0.46 | 1.06 | 3.66 |
| 3.14 | 5.9 | 10.4 | 1.07 | 1.74 | 1.59 | 0.63 | 2.55 | 3.73 |
| 3.26 | 6.6 | 10.1 | 1.07 | 2.07 | 2.34 | 1.06 | 2.79 | 3.45 |
| 3.36 | 3.4 | 10.0 | 1.07 | 1.87 | 2.78 | 0.67 | 3.87 | 5.21 |
| 3.11 | 6.2 | 10.1 | 1.11 | 1.94 | 2.48 | 0.80 | 1.62 | 3.66 |
| 3.21 | 5.7 | 10.2 | 1.10 | 2.02 | 2.78 | 0.88 | 1.90 | 3.37 |
| 3.17 | 6.7 | 9.2  | 0.91 | 1.87 | 2.42 | 4.43 | 4.46 | 3.41 |
| 3.31 | 6.6 | 9.4  | 1.07 | 1.97 | 2.50 | 1.05 | 5.54 | 3.00 |
| 3.24 | 6.3 | 10.4 | 0.99 | 1.51 | 2.58 | 1.24 | 1.86 | 5.35 |
| 3.13 | 6.5 | 10.4 | 0.95 | 1.87 | 2.42 | 1.07 | 1.97 | 2.81 |
| 3.24 | 6.7 | 9.6  | 1.11 | 1.94 | 2.66 | 0.96 | 2.90 | 6.22 |
| 3.22 | 6.7 | 9.1  | 1.02 | 1.62 | 2.50 | 1.08 | 6.51 | 3.12 |
| 3.41 | 6.4 | 10.3 | 0.95 | 1.74 | 2.90 | 1.39 | 2.45 | 1.62 |
| 3.02 | 6.5 | 10.4 | 1.02 | 1.87 | 2.70 | 0.67 | 1.89 | 4.23 |
| 3.36 | 6.7 | 10.5 | 1.07 | 1.82 | 2.73 | 1.17 | 2.50 | 2.33 |
| 3.31 | 6.1 | 9.6  | 1.10 | 1.91 | 2.65 | 1.26 | 3.16 | 2.22 |
| 3.24 | 6.6 | 10.3 | 0.99 | 1.94 | 2.98 | 0.77 | 2.69 | 1.20 |
| 3.38 | 6.6 | 10.1 | 0.99 | 1.90 | 2.72 | 0.84 | 2.81 | 2.43 |
| 3.21 | 6.6 | 8.9  | 1.15 | 1.74 | 2.82 | 0.87 | 2.28 | 1.55 |
| 3.18 | 6.2 | 9.2  | 0.95 | 1.78 | 2.65 | 0.83 | 3.45 | 2.56 |
| 3.29 | 6.5 | 8.4  | 0.91 | 1.94 | 1.66 | 0.61 | 4.34 | 2.95 |
| 3.09 | 6.7 | 7.3  | 0.90 | 1.93 | 2.42 | 0.61 | 2.68 | 4.50 |
| 2.65 | 6.9 | 8.9  | 0.95 | 2.02 | 2.46 | 0.55 | 2.89 | 3.50 |
| 3.21 | 6.6 | 10.0 | 1.03 | 1.97 | 2.48 | 0.50 | 4.60 | 4.76 |
| 3.11 | 6.3 | 10.4 | 0.83 | 1.81 | 2.98 | 0.68 | 2.63 | 1.74 |
| 2.96 | 6.5 | 9.8  | 0.99 | 1.67 | 2.58 | 0.92 | 3.33 | 2.07 |
| 2.91 | 6.5 | 9.9  | 0.95 | 1.66 | 1.87 | 1.06 | 0.92 | 2.55 |
| 3.34 | 6.4 | 9.7  | 1.11 | 1.89 | 2.14 | 1.05 | 1.23 | 2.34 |
| 3.25 | 6.6 | 10.1 | 1.11 | 1.70 | 2.62 | 0.93 | 1.14 | 3.84 |
| 3.15 | 6.7 | 10.1 | 1.07 | 1.50 | 2.90 | 1.18 | 2.69 | 3.58 |
| 3.29 | 6.6 | 10.2 | 0.76 | 1.81 | 2.46 | 1.00 | 1.34 | 5.63 |
| 3.11 | 5.8 | 9.9  | 0.83 | 1.99 | 2.78 | 0.79 | 3.02 | 4.00 |
| 3.00 | 4.9 | 9.6  | 0.88 | 1.78 | 2.40 | 0.69 | 2.24 | 2.95 |

|      |     |      |      |      |      |      |      |      |
|------|-----|------|------|------|------|------|------|------|
| 3.17 | 6.6 | 10.1 | 1.02 | 1.77 | 1.97 | 1.01 | 5.04 | 2.86 |
| 2.64 | 6.5 | 10.1 | 0.90 | 1.90 | 1.23 | 0.92 | 1.82 | 1.12 |
| 2.45 | 5.2 | 10.1 | 1.10 | 1.78 | 2.73 | 0.78 | 3.19 | 5.57 |
| 2.25 | 6.4 | 10.0 | 1.03 | 1.66 | 2.14 | 0.80 | 3.27 | 3.88 |
| 3.12 | 4.6 | 9.4  | 1.15 | 1.31 | 2.27 | 0.76 | 1.67 | 2.30 |
| 2.91 | 6.0 | 10.1 | 0.83 | 1.71 | 2.48 | 0.56 | 1.72 | 1.67 |
| 3.36 | 6.6 | 9.8  | 1.15 | 1.87 | 2.42 | 0.73 | 1.09 | 1.72 |
| 3.08 | 6.9 | 10.1 | 0.87 | 1.97 | 2.90 | 0.76 | 1.74 | 3.53 |
| 3.09 | 6.5 | 10.3 | 0.96 | 1.89 | 2.41 | 3.18 | 1.82 | 6.78 |
| 3.15 | 7.0 | 9.2  | 1.11 | 2.01 | 2.54 | 1.44 | 1.18 | 3.00 |
| 3.12 | 6.5 | 9.9  | 0.99 | 1.85 | 2.64 | 1.00 | 1.32 | 3.62 |
| 3.12 | 6.4 | 10.3 | 0.99 | 1.87 | 2.53 | 0.99 | 1.34 | 5.74 |
| 3.27 | 6.6 | 10.3 | 0.99 | 1.89 | 2.37 | 0.79 | 1.30 | 1.32 |
| 3.27 | 6.5 | 10.2 | 1.15 | 2.02 | 2.77 | 0.72 | 4.26 | 1.30 |
| 3.27 | 5.5 | 9.1  | 0.96 | 1.94 | 2.56 | 0.80 | 1.34 | 1.48 |
| 3.27 | 5.9 | 10.2 | 0.96 | 1.78 | 2.62 | 0.93 | 2.81 | 3.81 |
| 3.18 | 6.8 | 9.8  | 1.15 | 1.50 | 2.42 | 1.28 | 2.88 | 6.03 |
| 3.25 | 6.6 | 10.1 | 1.11 | 1.59 | 2.34 | 1.07 | 3.28 | 3.73 |
| 3.26 | 6.7 | 10.0 | 1.07 | 1.70 | 2.56 | 1.13 | 2.68 | 4.08 |
| 2.81 | 5.9 | 9.2  | 0.99 | 1.97 | 2.58 | 0.94 | 2.51 | 1.29 |
| 3.26 | 6.8 | 10.0 | 1.03 | 1.39 | 2.41 | 1.27 | 3.47 | 2.69 |
| 2.92 | 6.6 | 10.0 | 1.02 | 1.94 | 2.87 | 1.03 | 2.39 | 2.07 |
| 3.27 | 6.8 | 9.8  | 0.96 | 1.74 | 2.42 | 0.73 | 2.08 | 3.39 |
| 3.25 | 6.7 | 10.2 | 0.83 | 1.89 | 2.28 | 1.03 | 1.73 | 3.61 |
| 3.02 | 6.5 | 10.2 | 0.76 | 1.66 | 2.78 | 0.95 | 2.17 | 3.48 |
| 3.17 | 6.5 | 10.1 | 1.26 | 2.02 | 2.78 | 0.67 | 1.79 | 7.32 |
| 2.96 | 6.7 | 8.6  | 1.03 | 1.79 | 2.58 | 0.85 | 2.24 | 2.11 |
| 2.97 | 6.6 | 9.3  | 1.27 | 1.11 | 2.70 | 0.78 | 2.54 | 3.53 |
| 2.95 | 6.4 | 8.2  | 1.11 | 1.34 | 2.65 | 1.40 | 2.18 | 7.26 |
| 3.17 | 6.8 | 9.6  | 1.02 | 0.95 | 2.25 | 1.17 | 3.85 | 3.55 |
| 3.09 | 6.2 | 9.4  | 1.30 | 1.39 | 2.93 | 1.90 | 2.93 | 1.38 |
| 3.16 | 6.1 | 10.4 | 1.03 | 1.19 | 1.90 | 1.50 | 4.12 | 2.85 |
| 2.99 | 6.8 | 9.6  | 0.99 | 1.47 | 2.61 | 1.20 | 2.83 | 3.10 |
| 3.04 | 6.8 | 9.1  | 1.27 | 2.18 | 2.72 | 1.08 | 1.94 | 1.74 |
| 3.06 | 7.2 | 8.0  | 1.11 | 2.06 | 2.38 | 0.69 | 3.36 | 2.34 |

|      |     |      |      |      |      |      |      |      |
|------|-----|------|------|------|------|------|------|------|
| 3.20 | 6.1 | 9.5  | 1.27 | 2.10 | 2.73 | 1.16 | 3.30 | 1.34 |
| 3.16 | 6.6 | 10.2 | 1.30 | 2.09 | 2.49 | 1.81 | 3.29 | 1.17 |
| 3.12 | 6.2 | 10.2 | 0.95 | 1.70 | 2.60 | 0.89 | 2.92 | 2.86 |
| 2.93 | 6.5 | 10.1 | 0.99 | 2.22 | 1.86 | 0.68 | 2.99 | 3.62 |
| 2.86 | 6.7 | 9.9  | 1.06 | 2.17 | 2.18 | 0.67 | 2.45 | 3.58 |
| 3.06 | 5.3 | 9.8  | 1.07 | 2.18 | 2.66 | 0.57 | 2.79 | 3.50 |
| 3.11 | 6.9 | 10.2 | 1.14 | 2.10 | 2.36 | 0.58 | 2.30 | 4.64 |
| 3.22 | 6.8 | 10.1 | 1.18 | 1.90 | 2.71 | 0.69 | 1.79 | 3.37 |
| 2.44 | 6.7 | 9.0  | 1.27 | 2.01 | 2.86 | 1.15 | 3.97 | 3.72 |
| 2.93 | 7.0 | 8.4  | 0.99 | 2.17 | 2.69 | 0.45 | 3.14 | 2.54 |
| 3.19 | 6.5 | 10.0 | 1.02 | 1.94 | 2.58 | 0.99 | 1.92 | 1.89 |
| 3.08 | 6.6 | 9.8  | 0.91 | 1.98 | 2.66 | 0.67 | 1.50 | 3.88 |
| 2.99 | 6.3 | 9.9  | 1.07 | 1.89 | 2.69 | 0.57 | 2.95 | 4.88 |
| 1.50 | 6.8 | 10.0 | 0.91 | 1.94 | 2.21 | 1.06 | 3.77 | 4.07 |
| 2.02 | 5.8 | 9.9  | 1.27 | 2.02 | 1.78 | 0.75 | 2.46 | 2.51 |
| 2.29 | 6.0 | 9.9  | 1.07 | 1.90 | 1.85 | 1.25 | 2.50 | 2.56 |
| 3.07 | 5.2 | 10.0 | 1.06 | 2.06 | 2.41 | 1.13 | 1.59 | 3.73 |
| 3.06 | 6.6 | 9.6  | 0.95 | 2.09 | 1.98 | 0.88 | 1.18 | 3.59 |
| 3.13 | 5.7 | 10.2 | 1.11 | 1.94 | 2.48 | 1.25 | 1.23 | 2.89 |
| 2.86 | 6.5 | 10.2 | 1.11 | 2.02 | 2.65 | 0.90 | 3.76 | 1.94 |
| 2.81 | 6.6 | 10.0 | 0.99 | 1.90 | 2.49 | 0.95 | 2.91 | 5.66 |
| 2.89 | 6.6 | 10.0 | 0.95 | 2.10 | 2.73 | 0.93 | 2.76 | 3.32 |
| 1.90 | 6.5 | 10.0 | 1.30 | 2.09 | 2.10 | 0.68 | 1.56 | 4.52 |
| 1.18 | 5.8 | 9.6  | 1.07 | 1.86 | 2.69 | 1.17 | 2.19 | 4.03 |
| 3.27 | 6.6 | 10.2 | 0.98 | 1.57 | 2.77 | 1.02 | 3.83 | 2.56 |
| 3.22 | 6.6 | 10.2 | 1.15 | 2.18 | 2.68 | 1.07 | 2.16 | 4.13 |
| 3.29 | 6.6 | 9.9  | 1.19 | 2.22 | 2.57 | 1.06 | 2.88 | 3.13 |
| 3.13 | 6.6 | 9.9  | 0.99 | 1.86 | 2.53 | 0.50 | 4.06 | 2.22 |
| 3.38 | 6.0 | 9.7  | 1.14 | 1.90 | 2.86 | 0.50 | 2.04 | 2.74 |
| 3.56 | 6.4 | 10.2 | 1.07 | 1.77 | 2.75 | 1.02 | 2.97 | 3.46 |
| 3.52 | 6.7 | 9.7  | 1.10 | 2.06 | 2.66 | 0.82 | 2.39 | 3.29 |
| 3.40 | 5.9 | 10.0 | 0.95 | 1.98 | 2.61 | 0.67 | 2.50 | 2.04 |
| 3.21 | 6.4 | 5.3  | 1.11 | 1.78 | 2.52 | 0.65 | 2.09 | 1.72 |
| 3.23 | 6.5 | 7.9  | 0.99 | 1.69 | 2.66 | 1.14 | 2.74 | 2.52 |
| 3.46 | 6.5 | 10.0 | 1.27 | 2.01 | 2.53 | 1.02 | 2.50 | 3.10 |

|      |     |      |      |      |      |      |      |      |
|------|-----|------|------|------|------|------|------|------|
| 3.39 | 6.6 | 9.7  | 1.06 | 1.81 | 2.73 | 0.87 | 2.24 | 2.57 |
| 2.99 | 6.6 | 8.0  | 1.03 | 1.94 | 2.69 | 0.94 | 3.02 | 2.95 |
| 3.31 | 6.0 | 9.5  | 1.27 | 1.94 | 2.77 | 1.05 | 1.79 | 3.52 |
| 3.30 | 6.4 | 9.8  | 1.02 | 1.94 | 2.73 | 1.07 | 2.30 | 4.55 |
| 3.38 | 5.6 | 9.5  | 1.07 | 1.86 | 2.77 | 0.63 | 2.77 | 2.47 |
| 3.36 | 6.3 | 9.6  | 1.15 | 1.70 | 2.68 | 0.69 | 2.68 | 3.26 |
| 3.15 | 6.6 | 7.5  | 1.06 | 1.98 | 2.53 | 1.00 | 2.15 | 3.46 |
| 3.29 | 5.4 | 9.9  | 1.11 | 1.90 | 2.61 | 1.23 | 1.65 | 1.12 |
| 3.23 | 6.4 | 9.8  | 1.19 | 1.98 | 2.89 | 0.89 | 1.44 | 1.44 |
| 3.36 | 5.9 | 9.8  | 1.11 | 1.90 | 2.80 | 0.94 | 2.33 | 4.18 |
| 3.23 | 6.6 | 8.7  | 1.11 | 1.90 | 2.09 | 0.99 | 0.72 | 3.74 |
| 2.97 | 6.0 | 10.0 | 1.11 | 2.26 | 2.46 | 0.94 | 2.55 | 2.01 |
| 3.11 | 6.1 | 10.3 | 1.06 | 1.85 | 2.93 | 0.61 | 3.21 | 2.36 |
| 3.29 | 5.6 | 10.3 | 1.11 | 1.73 | 2.45 | 1.01 | 1.07 | 2.71 |
| 3.25 | 6.1 | 10.5 | 0.99 | 1.50 | 2.21 | 1.03 | 1.59 | 3.21 |
| 3.17 | 6.6 | 10.0 | 1.19 | 2.05 | 2.73 | 1.28 | 1.85 | 2.86 |
| 3.23 | 6.4 | 9.8  | 1.19 | 1.98 | 2.66 | 0.61 | 1.68 | 3.64 |
| 3.27 | 6.0 | 10.0 | 1.07 | 1.93 | 2.76 | 1.02 | 3.04 | 3.14 |
| 2.68 | 5.5 | 10.2 | 1.27 | 1.97 | 2.75 | 1.17 | 2.45 | 3.52 |
| 2.72 | 6.4 | 10.4 | 1.11 | 2.17 | 2.73 | 1.61 | 1.18 | 1.78 |
| 3.27 | 6.4 | 10.4 | 1.27 | 1.93 | 1.34 | 0.71 | 2.16 | 2.91 |
| 3.16 | 6.4 | 10.4 | 1.10 | 1.69 | 2.60 | 1.00 | 3.29 | 3.89 |
| 2.39 | 6.5 | 10.3 | 0.99 | 2.01 | 1.90 | 0.87 | 1.94 | 3.59 |
| 2.36 | 6.3 | 9.4  | 1.27 | 2.26 | 2.56 | 0.95 | 1.53 | 3.31 |
| 3.21 | 6.4 | 10.2 | 1.07 | 2.09 | 2.56 | 0.95 | 3.22 | 1.87 |
| 3.01 | 5.8 | 10.2 | 1.18 | 2.01 | 2.87 | 0.58 | 3.23 | 3.77 |
| 3.19 | 6.2 | 9.6  | 1.03 | 1.93 | 2.73 | 1.23 | 4.62 | 3.50 |
| 3.22 | 6.5 | 10.0 | 1.11 | 2.01 | 2.80 | 0.72 | 2.53 | 2.62 |
| 3.23 | 6.4 | 9.7  | 1.02 | 1.89 | 2.66 | 1.05 | 1.68 | 5.01 |
| 3.39 | 6.3 | 10.0 | 1.22 | 2.26 | 2.61 | 0.78 | 1.69 | 3.48 |
| 3.09 | 6.1 | 10.0 | 1.15 | 2.06 | 2.60 | 1.14 | 1.59 | 2.90 |
| 3.13 | 6.2 | 4.0  | 1.10 | 2.10 | 2.65 | 1.20 | 2.09 | 4.36 |
| 3.00 | 6.4 | 10.1 | 0.90 | 1.77 | 2.73 | 1.19 | 1.40 | 2.59 |
| 3.18 | 6.4 | 4.8  | 0.95 | 1.89 | 2.89 | 0.99 | 2.71 | 2.22 |
| 3.16 | 6.7 | 6.5  | 1.15 | 2.10 | 2.80 | 1.07 | 2.93 | 1.74 |

|      |     |      |      |      |      |      |      |      |
|------|-----|------|------|------|------|------|------|------|
| 3.22 | 6.3 | 10.3 | 0.87 | 2.13 | 2.32 | 1.37 | 2.60 | 3.73 |
| 3.31 | 6.4 | 9.2  | 0.95 | 2.09 | 2.45 | 0.78 | 3.28 | 1.56 |
| 3.21 | 6.0 | 8.8  | 1.15 | 2.30 | 2.81 | 1.26 | 3.24 | 3.17 |
| 2.95 | 6.4 | 6.7  | 0.90 | 1.94 | 2.61 | 0.88 | 1.73 | 3.78 |
| 2.86 | 6.6 | 6.7  | 1.15 | 2.09 | 2.61 | 2.24 | 2.33 | 4.34 |
| 3.06 | 6.4 | 10.1 | 0.79 | 1.98 | 2.73 | 1.97 | 1.12 | 1.43 |
| 3.15 | 6.4 | 8.5  | 1.42 | 1.97 | 2.77 | 0.83 | 2.06 | 2.56 |
| 3.21 | 5.2 | 9.3  | 1.18 | 1.73 | 2.86 | 0.88 | 1.93 | 2.55 |
| 3.38 | 6.3 | 10.1 | 0.79 | 1.38 | 2.80 | 1.11 | 1.91 | 1.45 |
| 3.02 | 6.1 | 10.2 | 0.98 | 1.62 | 2.44 | 1.18 | 1.92 | 3.21 |
| 3.16 | 6.2 | 7.1  | 0.91 | 2.06 | 2.48 | 1.62 | 2.90 | 2.28 |
| 3.42 | 6.3 | 10.4 | 0.99 | 1.58 | 2.69 | 1.84 | 1.44 | 2.50 |
| 3.27 | 6.0 | 10.1 | 0.75 | 1.90 | 2.33 | 0.89 | 1.34 | 1.50 |
| 3.22 | 6.3 | 9.4  | 0.75 | 1.70 | 1.66 | 0.67 | 3.16 | 1.58 |
| 3.27 | 6.1 | 9.1  | 1.02 | 1.81 | 2.48 | 0.98 | 3.31 | 3.68 |
| 3.29 | 6.1 | 9.8  | 0.98 | 2.40 | 2.33 | 0.46 | 3.02 | 2.29 |
| 3.21 | 5.3 | 10.0 | 0.83 | 1.90 | 2.97 | 0.61 | 2.37 | 2.70 |
| 3.39 | 6.3 | 10.2 | 0.90 | 2.06 | 3.48 | 1.66 | 3.16 | 4.08 |
| 3.13 | 5.6 | 10.3 | 0.95 | 1.94 | 1.78 | 1.73 | 1.90 | 4.23 |
| 3.41 | 6.3 | 8.9  | 0.99 | 1.74 | 2.32 | 1.89 | 2.44 | 3.98 |
| 3.22 | 6.0 | 9.9  | 0.91 | 1.93 | 2.68 | 0.56 | 2.86 | 3.66 |
| 2.74 | 5.3 | 9.8  | 0.90 | 1.57 | 2.87 | 3.16 | 2.16 | 6.51 |
| 3.15 | 6.2 | 9.8  | 1.06 | 1.78 | 2.81 | 0.95 | 5.05 | 3.78 |
| 3.26 | 6.5 | 9.8  | 0.95 | 2.06 | 2.89 | 1.27 | 2.51 | 4.08 |
| 2.54 | 5.9 | 10.4 | 0.98 | 1.81 | 2.73 | 1.63 | 4.18 | 2.54 |
| 3.33 | 3.6 | 10.1 | 0.83 | 1.90 | 2.26 | 1.00 | 1.28 | 3.02 |
| 2.88 | 2.2 | 10.2 | 0.87 | 1.70 | 2.65 | 0.78 | 1.01 | 2.28 |
| 2.91 | 6.5 | 9.7  | 0.90 | 1.78 | 1.70 | 1.07 | 2.24 | 5.17 |
| 2.86 | 6.6 | 10.3 | 0.87 | 1.97 | 2.80 | 1.14 | 2.08 | 4.06 |
| 3.00 | 6.7 | 8.0  | 1.07 | 2.01 | 1.34 | 0.70 | 1.32 | 3.83 |
| 2.30 | 6.5 | 6.6  | 0.79 | 2.18 | 2.81 | 1.38 | 2.39 | 4.55 |
| 2.34 | 6.8 | 10.2 | 0.75 | 1.98 | 2.81 | 1.23 | 3.22 | 1.89 |
| 2.17 | 6.5 | 9.9  | 0.83 | 1.97 | 2.72 | 0.85 | 1.74 | 2.59 |
| 2.67 | 6.7 | 10.3 | 0.87 | 1.69 | 2.28 | 0.90 | 1.00 | 2.04 |
| 2.45 | 6.9 | 3.6  | 0.91 | 1.78 | 2.69 | 1.62 | 1.89 | 2.88 |

|      |     |      |      |      |      |      |      |      |
|------|-----|------|------|------|------|------|------|------|
| 3.36 | 6.6 | 10.2 | 0.90 | 1.97 | 1.62 | 1.02 | 1.76 | 2.60 |
| 3.15 | 6.6 | 10.3 | 0.95 | 1.89 | 2.80 | 0.68 | 2.18 | 2.07 |
| 3.31 | 6.7 | 10.3 | 0.75 | 1.90 | 2.77 | 0.96 | 2.27 | 3.73 |
| 2.66 | 5.9 | 10.0 | 0.75 | 1.98 | 2.32 | 0.62 | 5.07 | 1.23 |
| 1.89 | 6.7 | 10.4 | 0.75 | 1.85 | 2.24 | 1.11 | 3.59 | 2.09 |
| 2.21 | 6.6 | 10.3 | 0.99 | 1.86 | 2.72 | 1.67 | 1.42 | 3.51 |
| 3.19 | 6.4 | 10.4 | 0.83 | 2.04 | 1.78 | 0.85 | 1.07 | 4.18 |
| 2.64 | 6.2 | 10.2 | 0.99 | 2.06 | 2.80 | 0.67 | 3.12 | 2.97 |
| 3.21 | 6.4 | 10.0 | 1.15 | 1.89 | 2.73 | 1.17 | 2.84 | 3.84 |
| 3.12 | 6.5 | 10.1 | 1.03 | 1.85 | 2.41 | 1.20 | 1.67 | 4.50 |
| 3.18 | 6.5 | 10.3 | 0.91 | 1.82 | 2.69 | 0.69 | 1.27 | 3.49 |
| 3.33 | 6.5 | 10.2 | 0.90 | 1.81 | 2.57 | 0.91 | 2.14 | 3.66 |
| 3.20 | 6.4 | 10.1 | 0.99 | 1.70 | 2.68 | 0.77 | 1.67 | 2.01 |
| 2.79 | 6.0 | 9.2  | 0.87 | 1.69 | 2.46 | 1.39 | 1.08 | 3.06 |
| 3.15 | 6.4 | 9.3  | 0.83 | 1.70 | 2.81 | 1.29 | 1.34 | 3.16 |
| 3.21 | 6.4 | 10.3 | 0.75 | 1.90 | 2.65 | 0.89 | 2.44 | 3.01 |
| 3.27 | 6.7 | 7.0  | 0.90 | 1.90 | 2.80 | 0.96 | 1.74 | 2.22 |
| 3.27 | 6.3 | 10.4 | 0.87 | 2.06 | 2.77 | 0.95 | 4.17 | 3.76 |
| 3.25 | 6.5 | 4.9  | 0.79 | 2.13 | 2.89 | 1.26 | 2.36 | 3.14 |
| 3.13 | 6.4 | 10.2 | 0.87 | 1.94 | 2.48 | 1.18 | 2.39 | 4.33 |
| 3.40 | 6.5 | 10.3 | 1.02 | 1.42 | 2.79 | 0.56 | 2.34 | 1.43 |
| 2.81 | 6.2 | 10.5 | 0.87 | 1.85 | 2.26 | 0.95 | 2.69 | 3.86 |
| 3.04 | 6.4 | 10.4 | 0.79 | 1.73 | 2.73 | 1.31 | 2.71 | 2.33 |
| 3.06 | 6.4 | 10.5 | 0.87 | 1.98 | 2.57 | 1.00 | 3.58 | 3.68 |
| 3.11 | 6.6 | 10.2 | 1.03 | 1.26 | 2.69 | 0.87 | 3.83 | 6.89 |
| 3.13 | 6.7 | 10.0 | 1.06 | 2.09 | 2.63 | 1.10 | 2.41 | 3.78 |
| 3.27 | 6.7 | 10.0 | 0.80 | 1.74 | 2.80 | 0.67 | 2.36 | 4.06 |
| 3.29 | 6.8 | 10.2 | 0.72 | 1.65 | 2.69 | 1.06 | 2.07 | 2.91 |
| 2.99 | 6.2 | 3.1  | 1.03 | 1.81 | 2.48 | 1.73 | 2.34 | 3.19 |
| 3.26 | 6.5 | 2.6  | 1.03 | 2.06 | 2.73 | 1.87 | 0.97 | 3.36 |
| 2.51 | 6.4 | 2.0  | 1.16 | 1.70 | 2.26 | 0.67 | 1.32 | 3.51 |
| 3.23 | 6.5 | 10.3 | 0.83 | 1.90 | 2.73 | 0.78 | 1.96 | 2.07 |
| 2.96 | 6.9 | 10.1 | 0.99 | 1.78 | 2.48 | 0.77 | 2.75 | 4.68 |
| 3.23 | 6.5 | 10.5 | 0.88 | 1.94 | 2.89 | 1.27 | 2.45 | 2.07 |
| 2.86 | 6.7 | 10.4 | 1.11 | 1.70 | 2.63 | 1.14 | 1.81 | 2.81 |

|      |     |      |      |      |      |      |      |      |
|------|-----|------|------|------|------|------|------|------|
| 2.86 | 6.5 | 10.5 | 0.83 | 1.98 | 2.97 | 1.10 | 3.39 | 2.83 |
| 3.12 | 6.0 | 9.7  | 1.11 | 1.90 | 2.48 | 6.18 | 3.72 | 2.41 |
| 2.96 | 3.7 | 10.5 | 0.91 | 1.94 | 2.53 | 1.10 | 2.95 | 5.65 |
| 2.99 | 6.9 | 9.9  | 1.11 | 2.13 | 2.41 | 0.68 | 3.38 | 4.21 |
| 2.59 | 6.6 | 10.4 | 0.88 | 1.70 | 1.47 | 0.57 | 4.42 | 5.28 |
| 2.66 | 4.9 | 10.4 | 1.16 | 1.73 | 2.77 | 0.79 | 3.52 | 5.50 |
| 4.03 | 6.7 | 10.1 | 0.96 | 1.57 | 2.81 | 1.55 | 1.79 | 3.57 |
| 2.99 | 6.7 | 9.8  | 0.99 | 1.27 | 2.01 | 0.96 | 2.17 | 4.41 |
| 3.04 | 4.1 | 10.0 | 0.99 | 0.67 | 2.77 | 0.79 | 1.53 | 3.53 |
| 2.77 | 5.4 | 10.3 | 0.99 | 1.15 | 2.41 | 0.78 | 1.39 | 3.41 |
| 2.81 | 6.3 | 10.3 | 1.00 | 1.06 | 2.57 | 1.13 | 2.91 | 5.62 |
| 2.52 | 5.5 | 9.8  | 1.03 | 1.62 | 2.80 | 1.15 | 2.85 | 3.78 |
| 2.85 | 4.1 | 10.2 | 0.76 | 1.74 | 1.85 | 0.61 | 1.30 | 3.98 |
| 2.86 | 3.2 | 10.1 | 0.91 | 2.14 | 2.45 | 0.56 | 3.35 | 2.01 |
| 2.91 | 1.8 | 9.8  | 0.92 | 1.94 | 2.48 | 1.32 | 3.17 | 3.85 |
| 2.95 | 6.5 | 10.2 | 1.11 | 2.10 | 2.04 | 0.84 | 2.06 | 3.82 |
| 2.91 | 6.6 | 9.9  | 1.03 | 1.79 | 3.13 | 0.97 | 3.42 | 6.09 |
| 3.06 | 6.7 | 10.1 | 1.19 | 1.90 | 3.13 | 1.23 | 3.07 | 7.14 |
| 2.93 | 6.6 | 7.7  | 0.83 | 1.83 | 2.98 | 1.06 | 1.76 | 2.25 |
| 2.93 | 6.8 | 9.5  | 1.00 | 1.94 | 3.26 | 0.76 | 1.99 | 6.17 |
| 2.91 | 6.7 | 7.5  | 0.80 | 1.83 | 3.10 | 0.83 | 3.68 | 4.45 |
| 2.95 | 6.4 | 6.7  | 0.97 | 1.87 | 2.91 | 1.36 | 2.53 | 2.45 |
| 3.02 | 6.8 | 9.9  | 0.85 | 1.87 | 2.78 | 1.10 | 5.18 | 3.60 |
| 3.08 | 6.6 | 10.2 | 1.03 | 1.79 | 2.85 | 1.16 | 2.39 | 3.30 |
| 2.91 | 6.8 | 10.2 | 0.83 | 2.07 | 2.90 | 1.15 | 2.08 | 4.11 |
| 2.71 | 6.7 | 9.6  | 0.91 | 1.83 | 2.62 | 1.84 | 2.28 | 3.82 |
| 2.89 | 6.9 | 9.8  | 0.91 | 1.71 | 3.07 | 1.56 | 2.39 | 3.24 |
| 2.69 | 6.5 | 10.3 | 0.92 | 1.56 | 2.67 | 1.35 | 1.74 | 4.56 |
| 2.66 | 6.4 | 8.2  | 0.83 | 1.82 | 3.13 | 0.95 | 0.89 | 4.46 |
| 2.85 | 6.5 | 9.5  | 1.11 | 1.79 | 2.98 | 1.50 | 2.14 | 2.12 |
| 2.89 | 6.7 | 9.7  | 0.97 | 1.99 | 2.86 | 0.70 | 2.83 | 3.82 |
| 2.82 | 6.4 | 9.8  | 0.96 | 1.79 | 3.10 | 0.67 | 1.88 | 4.29 |
| 2.74 | 5.8 | 10.4 | 0.91 | 1.45 | 3.10 | 0.68 | 3.06 | 2.06 |
| 2.83 | 6.6 | 10.4 | 1.23 | 1.82 | 2.98 | 0.99 | 5.65 | 5.45 |
| 2.96 | 6.6 | 10.3 | 0.91 | 1.87 | 2.90 | 0.90 | 2.71 | 4.19 |

|      |     |      |      |      |      |      |      |      |
|------|-----|------|------|------|------|------|------|------|
| 2.81 | 6.2 | 10.2 | 0.96 | 1.87 | 2.78 | 0.96 | 2.18 | 2.61 |
| 2.90 | 6.7 | 9.9  | 0.83 | 2.02 | 3.02 | 0.56 | 1.97 | 3.57 |
| 2.84 | 6.7 | 10.0 | 0.91 | 1.93 | 2.82 | 0.83 | 3.28 | 7.22 |
| 2.96 | 6.6 | 10.4 | 0.96 | 1.67 | 2.88 | 1.57 | 2.56 | 1.74 |
| 2.97 | 6.6 | 7.9  | 0.88 | 1.74 | 2.70 | 0.50 | 1.85 | 1.57 |
| 3.01 | 6.9 | 9.3  | 0.97 | 1.74 | 2.50 | 1.06 | 3.44 | 2.27 |
| 2.80 | 6.7 | 9.2  | 0.96 | 1.94 | 2.58 | 1.16 | 1.34 | 2.00 |
| 2.93 | 4.9 | 9.8  | 0.85 | 1.87 | 2.34 | 1.14 | 2.77 | 3.52 |
| 2.59 | 6.0 | 3.8  | 0.83 | 1.87 | 2.91 | 0.62 | 2.17 | 2.28 |
| 2.89 | 6.6 | 2.8  | 0.96 | 1.67 | 2.78 | 0.88 | 2.92 | 3.69 |
| 2.98 | 6.3 | 10.3 | 0.76 | 1.94 | 2.70 | 0.95 | 1.56 | 3.94 |
| 2.53 | 6.6 | 10.1 | 0.83 | 1.85 | 2.70 | 0.88 | 3.38 | 1.97 |
| 2.53 | 2.4 | 9.6  | 1.08 | 1.39 | 2.07 | 0.50 | 3.99 | 3.99 |
| 2.71 | 6.7 | 10.3 | 0.80 | 1.71 | 2.90 | 1.03 | 1.74 | 3.44 |
| 2.79 | 6.7 | 10.3 | 0.88 | 1.71 | 2.86 | 1.44 | 2.81 | 1.50 |
| 2.85 | 6.7 | 9.9  | 0.91 | 1.87 | 2.42 | 0.85 | 2.79 | 2.10 |
| 2.39 | 6.6 | 10.2 | 0.92 | 1.83 | 2.78 | 0.60 | 3.25 | 4.96 |
| 2.97 | 6.8 | 10.0 | 1.19 | 1.99 | 3.11 | 0.97 | 2.20 | 2.15 |
| 3.09 | 6.6 | 9.4  | 1.19 | 1.88 | 2.82 | 4.09 | 2.67 | 6.92 |
| 2.62 | 6.7 | 10.2 | 1.07 | 2.02 | 2.70 | 0.88 | 1.99 | 3.09 |
| 2.93 | 6.4 | 10.4 | 0.91 | 1.87 | 2.86 | 0.57 | 4.02 | 2.68 |
| 2.15 | 6.7 | 8.8  | 1.07 | 1.79 | 2.86 | 0.56 | 2.44 | 2.95 |
| 2.34 | 6.5 | 9.4  | 0.95 | 1.91 | 3.27 | 0.87 | 3.10 | 3.80 |
| 2.46 | 6.8 | 10.6 | 0.79 | 1.79 | 3.33 | 1.18 | 1.06 | 3.58 |
| 2.85 | 6.7 | 10.2 | 1.07 | 1.94 | 1.96 | 1.02 | 1.44 | 2.44 |
| 2.74 | 6.7 | 9.2  | 0.95 | 1.68 | 2.86 | 0.83 | 3.60 | 4.65 |
| 3.09 | 6.7 | 10.5 | 0.91 | 1.87 | 3.06 | 0.45 | 1.27 | 2.79 |
| 3.11 | 6.8 | 10.2 | 1.07 | 1.94 | 2.90 | 2.12 | 0.79 | 2.97 |
| 3.17 | 6.7 | 9.8  | 1.07 | 1.79 | 3.16 | 3.46 | 1.47 | 2.59 |
| 3.18 | 6.7 | 10.4 | 0.95 | 1.71 | 2.93 | 0.83 | 1.25 | 4.53 |
| 2.94 | 6.5 | 10.2 | 1.19 | 1.99 | 2.98 | 1.00 | 2.44 | 3.87 |
| 3.16 | 6.6 | 10.5 | 0.79 | 1.79 | 2.90 | 0.60 | 2.92 | 4.60 |
| 3.11 | 6.5 | 9.9  | 0.91 | 1.68 | 2.90 | 1.34 | 6.34 | 3.44 |
| 3.20 | 6.5 | 10.2 | 0.79 | 1.74 | 2.86 | 0.63 | 3.28 | 3.95 |
| 3.20 | 6.7 | 10.5 | 0.91 | 1.67 | 2.79 | 1.36 | 3.08 | 3.45 |

|      |     |      |      |      |      |      |      |      |
|------|-----|------|------|------|------|------|------|------|
| 3.12 | 6.6 | 10.3 | 0.95 | 1.31 | 2.90 | 1.14 | 2.75 | 2.53 |
| 3.24 | 6.5 | 10.3 | 0.71 | 1.25 | 2.70 | 0.90 | 2.01 | 4.87 |
| 3.13 | 6.6 | 8.9  | 0.91 | 1.31 | 2.96 | 1.16 | 1.68 | 2.06 |
| 3.01 | 6.5 | 9.8  | 0.91 | 2.01 | 2.90 | 1.22 | 2.55 | 1.30 |
| 3.02 | 6.7 | 10.3 | 0.91 | 1.87 | 2.34 | 0.87 | 3.35 | 3.34 |
| 2.92 | 6.0 | 9.5  | 0.91 | 2.07 | 2.02 | 0.56 | 0.89 | 3.37 |
| 2.97 | 6.6 | 10.3 | 0.91 | 1.79 | 1.79 | 1.67 | 1.84 | 2.71 |
| 3.29 | 6.7 | 7.6  | 0.91 | 2.14 | 2.80 | 1.06 | 3.26 | 5.04 |
| 3.00 | 6.7 | 10.2 | 0.91 | 1.86 | 2.72 | 1.02 | 2.34 | 2.40 |
| 2.95 | 6.5 | 9.1  | 1.15 | 1.81 | 2.82 | 0.78 | 2.34 | 1.74 |
| 2.88 | 6.6 | 5.0  | 0.83 | 2.02 | 2.49 | 1.16 | 1.95 | 3.59 |
| 3.17 | 6.4 | 9.2  | 1.08 | 1.97 | 2.76 | 1.73 | 1.78 | 2.42 |
| 3.06 | 6.7 | 10.0 | 1.11 | 1.82 | 2.61 | 0.97 | 2.44 | 5.15 |
| 3.11 | 6.7 | 10.4 | 1.08 | 1.71 | 2.76 | 1.03 | 6.11 | 2.20 |
| 2.97 | 6.6 | 10.4 | 1.02 | 1.86 | 2.72 | 0.87 | 5.45 | 2.34 |
| 3.00 | 6.8 | 10.4 | 0.79 | 1.86 | 2.90 | 1.06 | 4.52 | 2.20 |
| 2.88 | 6.8 | 9.9  | 0.96 | 1.78 | 2.77 | 1.06 | 1.42 | 3.46 |
| 3.04 | 5.9 | 9.8  | 1.08 | 1.62 | 2.56 | 0.95 | 3.39 | 2.78 |
| 2.96 | 6.6 | 10.1 | 1.03 | 1.89 | 2.68 | 1.57 | 2.96 | 7.68 |
| 3.10 | 6.8 | 10.1 | 1.22 | 2.14 | 2.73 | 1.01 | 1.57 | 4.06 |
| 2.97 | 6.6 | 10.1 | 1.03 | 1.90 | 2.53 | 0.77 | 3.93 | 1.65 |
| 3.13 | 5.7 | 9.9  | 0.87 | 1.90 | 2.60 | 0.83 | 1.80 | 2.67 |
| 2.85 | 6.8 | 10.0 | 0.83 | 2.06 | 2.75 | 1.00 | 0.93 | 5.67 |
| 2.96 | 4.5 | 9.9  | 0.99 | 1.67 | 2.47 | 1.04 | 1.17 | 1.82 |
| 3.23 | 4.5 | 10.2 | 1.08 | 1.77 | 2.92 | 1.06 | 2.98 | 3.46 |
| 2.92 | 6.8 | 9.7  | 1.19 | 1.89 | 2.69 | 0.95 | 2.79 | 3.62 |
| 3.19 | 6.4 | 10.3 | 1.11 | 1.97 | 2.48 | 1.45 | 1.37 | 9.67 |
| 3.29 | 5.5 | 10.3 | 0.99 | 1.94 | 2.73 | 1.27 | 2.50 | 3.78 |
| 2.88 | 6.2 | 7.9  | 1.02 | 1.81 | 2.50 | 0.79 | 3.02 | 3.81 |
| 2.79 | 6.6 | 10.2 | 1.07 | 1.94 | 2.58 | 1.28 | 3.08 | 3.53 |
| 2.87 | 6.3 | 9.7  | 1.11 | 1.86 | 2.56 | 1.87 | 3.45 | 2.59 |
| 3.15 | 6.2 | 10.3 | 1.03 | 1.94 | 2.89 | 0.79 | 1.96 | 1.85 |
| 3.14 | 6.6 | 10.5 | 1.03 | 1.89 | 2.73 | 0.68 | 1.54 | 3.28 |
| 2.99 | 6.4 | 7.9  | 1.10 | 2.06 | 2.67 | 3.47 | 3.30 | 4.35 |
| 3.22 | 6.4 | 10.0 | 0.99 | 2.07 | 2.22 | 0.67 | 2.03 | 1.17 |

|      |     |      |      |      |      |      |      |      |
|------|-----|------|------|------|------|------|------|------|
| 3.20 | 6.5 | 10.4 | 0.88 | 1.87 | 2.62 | 1.18 | 3.12 | 2.22 |
| 2.97 | 6.3 | 10.3 | 0.95 | 1.71 | 2.72 | 1.13 | 3.44 | 4.57 |
| 2.82 | 6.5 | 10.4 | 1.15 | 1.59 | 2.64 | 1.20 | 8.22 | 2.96 |
| 3.16 | 6.8 | 10.2 | 0.99 | 1.85 | 2.60 | 0.93 | 1.39 | 3.22 |
| 2.97 | 6.5 | 10.1 | 0.96 | 1.70 | 2.69 | 1.17 | 2.36 | 2.56 |
| 3.01 | 4.7 | 9.8  | 1.07 | 1.90 | 2.60 | 1.58 | 1.89 | 2.86 |
| 3.13 | 6.2 | 10.0 | 1.34 | 1.98 | 2.60 | 1.46 | 3.01 | 3.44 |
| 2.99 | 6.6 | 10.3 | 1.10 | 1.71 | 2.21 | 1.22 | 2.37 | 6.07 |
| 2.24 | 6.6 | 10.1 | 0.98 | 1.97 | 2.62 | 0.88 | 2.02 | 2.39 |
| 1.89 | 6.7 | 5.3  | 1.22 | 1.66 | 2.37 | 1.22 | 2.67 | 3.74 |
| 2.88 | 6.6 | 10.1 | 0.98 | 1.89 | 2.73 | 3.18 | 1.32 | 5.30 |
| 2.77 | 5.2 | 10.4 | 0.98 | 1.89 | 2.75 | 0.87 | 2.18 | 2.04 |
| 2.74 | 6.6 | 2.5  | 1.22 | 1.67 | 2.57 | 1.55 | 1.74 | 3.84 |
| 2.59 | 6.7 | 10.4 | 1.22 | 1.89 | 2.67 | 0.71 | 1.52 | 3.34 |
| 3.01 | 6.7 | 10.4 | 0.98 | 1.78 | 2.42 | 0.85 | 1.69 | 1.08 |
| 3.30 | 6.3 | 9.9  | 1.10 | 1.90 | 2.68 | 1.00 | 2.90 | 0.65 |
| 3.38 | 6.3 | 9.9  | 0.79 | 1.90 | 2.47 | 1.61 | 3.62 | 6.78 |
| 3.20 | 6.7 | 10.1 | 0.98 | 2.06 | 2.25 | 1.29 | 1.62 | 5.86 |
| 3.27 | 6.5 | 10.1 | 0.98 | 1.99 | 2.29 | 0.78 | 2.34 | 2.06 |
| 3.13 | 6.5 | 9.6  | 0.90 | 1.97 | 2.53 | 1.02 | 3.11 | 3.81 |
| 3.27 | 6.3 | 8.5  | 0.79 | 2.01 | 2.47 | 0.95 | 3.79 | 4.02 |
| 3.11 | 6.4 | 10.5 | 0.94 | 1.77 | 2.53 | 0.67 | 2.47 | 3.09 |
| 3.09 | 6.7 | 9.6  | 1.06 | 1.79 | 2.64 | 1.06 | 4.14 | 2.48 |
| 3.22 | 6.6 | 10.1 | 1.02 | 1.90 | 2.62 | 1.28 | 1.80 | 3.71 |
| 2.92 | 6.6 | 10.3 | 0.98 | 1.81 | 2.60 | 0.97 | 1.39 | 3.27 |
| 3.04 | 5.8 | 10.3 | 0.83 | 1.94 | 2.69 | 1.00 | 2.48 | 2.42 |
| 3.25 | 5.3 | 10.3 | 0.98 | 1.59 | 2.62 | 0.93 | 4.04 | 7.61 |
| 3.29 | 6.2 | 10.1 | 1.02 | 1.36 | 2.69 | 1.02 | 2.56 | 4.18 |
| 3.13 | 4.3 | 10.2 | 0.98 | 1.26 | 2.81 | 1.11 | 5.12 | 3.62 |
| 3.06 | 1.9 | 10.0 | 0.90 | 1.69 | 2.49 | 1.06 | 4.10 | 3.95 |
| 3.09 | 6.3 | 10.2 | 1.26 | 1.78 | 2.57 | 0.53 | 0.75 | 1.65 |
| 3.21 | 6.6 | 10.0 | 1.14 | 1.62 | 2.41 | 0.50 | 2.37 | 2.19 |
| 3.18 | 6.7 | 10.2 | 1.06 | 1.97 | 2.70 | 1.00 | 3.17 | 1.78 |
| 2.98 | 6.9 | 9.9  | 0.86 | 2.20 | 2.65 | 0.56 | 4.56 | 2.88 |
| 3.02 | 6.6 | 9.6  | 0.98 | 1.97 | 2.10 | 0.97 | 3.17 | 3.69 |

|      |     |      |      |      |      |      |      |      |
|------|-----|------|------|------|------|------|------|------|
| 3.18 | 6.4 | 10.3 | 0.94 | 1.93 | 2.65 | 0.95 | 2.91 | 4.19 |
| 3.23 | 6.4 | 10.3 | 1.06 | 1.77 | 2.61 | 0.79 | 2.88 | 3.79 |
| 3.21 | 6.7 | 9.9  | 0.90 | 2.16 | 2.26 | 1.08 | 1.41 | 1.99 |
| 3.35 | 6.8 | 10.5 | 1.22 | 1.93 | 1.58 | 0.78 | 3.17 | 4.85 |
| 3.21 | 6.7 | 10.1 | 1.14 | 2.12 | 2.75 | 0.96 | 3.34 | 2.33 |
| 2.87 | 6.4 | 10.3 | 1.06 | 1.89 | 2.71 | 1.00 | 1.83 | 1.48 |
| 2.97 | 6.9 | 10.1 | 0.94 | 1.97 | 2.63 | 1.27 | 2.66 | 3.55 |
| 3.09 | 6.5 | 10.3 | 1.06 | 2.08 | 2.52 | 0.83 | 4.22 | 1.47 |
| 2.41 | 6.8 | 9.3  | 1.14 | 2.04 | 2.56 | 0.80 | 1.69 | 3.65 |
| 1.94 | 6.3 | 10.1 | 1.14 | 1.97 | 3.14 | 0.74 | 2.76 | 2.44 |
| 3.01 | 6.4 | 10.1 | 0.94 | 1.93 | 2.75 | 1.06 | 2.02 | 3.56 |
| 3.13 | 6.8 | 9.9  | 1.14 | 1.85 | 2.79 | 0.69 | 5.19 | 3.60 |
| 2.39 | 6.8 | 9.7  | 1.06 | 1.85 | 2.79 | 0.98 | 1.50 | 3.59 |
| 3.11 | 6.8 | 10.4 | 1.14 | 1.97 | 2.79 | 0.88 | 1.17 | 3.28 |
| 3.27 | 6.8 | 10.4 | 1.02 | 1.85 | 2.79 | 1.07 | 2.39 | 3.68 |
| 3.12 | 6.5 | 4.7  | 1.06 | 1.93 | 2.79 | 1.02 | 2.24 | 4.79 |
| 3.29 | 6.7 | 5.2  | 1.10 | 1.85 | 2.75 | 1.31 | 6.57 | 2.78 |
| 3.22 | 6.8 | 9.5  | 1.10 | 1.89 | 2.59 | 1.16 | 2.07 | 5.41 |
| 3.34 | 6.6 | 10.2 | 0.79 | 1.85 | 2.59 | 0.77 | 3.56 | 1.93 |
| 3.25 | 6.7 | 10.4 | 0.98 | 2.12 | 2.71 | 0.84 | 3.41 | 1.42 |
| 3.32 | 6.6 | 10.0 | 0.94 | 1.96 | 2.67 | 0.75 | 4.17 | 3.20 |
| 3.16 | 6.6 | 9.5  | 0.94 | 1.61 | 2.75 | 1.25 | 2.33 | 4.66 |
| 3.16 | 6.6 | 9.3  | 0.90 | 1.81 | 2.79 | 1.04 | 2.83 | 3.33 |
| 3.25 | 6.3 | 10.1 | 0.90 | 1.89 | 2.67 | 0.95 | 2.62 | 6.12 |
| 3.25 | 6.6 | 10.5 | 0.98 | 1.97 | 2.71 | 0.85 | 2.70 | 5.39 |
| 3.25 | 6.7 | 10.4 | 0.98 | 1.81 | 2.44 | 0.87 | 1.76 | 1.63 |
| 3.23 | 6.6 | 10.2 | 1.02 | 1.81 | 2.56 | 0.88 | 2.61 | 2.57 |
| 3.00 | 5.6 | 10.4 | 1.02 | 1.93 | 2.20 | 1.02 | 3.03 | 0.83 |
| 3.22 | 6.3 | 10.3 | 0.94 | 1.89 | 2.12 | 0.67 | 1.84 | 0.72 |
| 3.08 | 6.6 | 10.6 | 1.14 | 1.77 | 2.20 | 0.85 | 2.17 | 8.87 |
| 3.34 | 6.6 | 10.4 | 0.94 | 1.73 | 2.44 | 1.04 | 1.37 | 2.81 |
| 3.02 | 5.3 | 10.4 | 1.02 | 1.89 | 2.12 | 1.34 | 2.83 | 2.81 |
| 3.46 | 6.5 | 10.1 | 1.10 | 1.89 | 2.79 | 0.63 | 4.56 | 1.68 |
| 3.34 | 2.1 | 9.8  | 1.10 | 1.89 | 2.12 | 0.73 | 2.75 | 2.80 |
| 3.36 | 6.4 | 9.8  | 1.14 | 1.77 | 2.52 | 0.73 | 2.52 | 2.28 |

|      |     |      |      |      |      |      |      |      |
|------|-----|------|------|------|------|------|------|------|
| 3.32 | 6.6 | 9.9  | 0.83 | 1.97 | 2.52 | 0.63 | 1.42 | 5.09 |
| 3.30 | 6.3 | 10.0 | 1.18 | 1.93 | 2.87 | 0.57 | 2.39 | 4.83 |
| 3.13 | 6.6 | 3.9  | 1.26 | 1.77 | 2.71 | 0.68 | 1.94 | 4.36 |
| 3.19 | 6.4 | 10.3 | 1.26 | 1.81 | 2.59 | 0.95 | 3.39 | 5.33 |
| 3.18 | 6.1 | 5.6  | 0.94 | 1.65 | 2.67 | 0.48 | 2.76 | 2.84 |
| 3.45 | 6.5 | 10.2 | 1.02 | 1.96 | 2.36 | 0.46 | 2.74 | 3.70 |
| 3.27 | 5.4 | 7.7  | 0.98 | 1.85 | 2.67 | 0.82 | 2.57 | 2.36 |
| 3.25 | 6.6 | 8.4  | 0.98 | 1.85 | 2.44 | 0.78 | 1.67 | 3.36 |
| 3.06 | 6.5 | 5.1  | 1.10 | 1.96 | 2.75 | 0.88 | 2.63 | 3.87 |
| 3.31 | 6.5 | 10.3 | 0.75 | 1.85 | 2.67 | 0.94 | 1.63 | 3.66 |
| 3.12 | 6.5 | 9.9  | 0.90 | 2.00 | 2.59 | 1.14 | 2.86 | 3.72 |
| 3.15 | 6.7 | 9.6  | 0.95 | 1.77 | 2.52 | 1.03 | 2.47 | 2.50 |
| 2.91 | 6.6 | 9.9  | 0.95 | 1.93 | 2.44 | 1.02 | 2.33 | 2.93 |
| 2.89 | 6.5 | 10.6 | 1.14 | 1.97 | 2.67 | 1.05 | 3.27 | 3.62 |
| 2.96 | 6.7 | 10.4 | 1.14 | 1.97 | 2.95 | 1.02 | 2.20 | 1.88 |
| 3.20 | 6.7 | 10.3 | 1.10 | 2.00 | 2.52 | 0.87 | 3.59 | 3.67 |
| 3.06 | 6.5 | 10.3 | 0.94 | 1.73 | 3.11 | 0.90 | 2.15 | 5.76 |
| 3.08 | 6.7 | 9.9  | 1.14 | 2.04 | 2.75 | 0.45 | 2.47 | 3.48 |
| 3.21 | 5.9 | 10.1 | 1.02 | 1.93 | 2.75 | 0.68 | 2.81 | 2.57 |
| 3.25 | 6.7 | 9.9  | 1.02 | 1.77 | 2.79 | 0.61 | 1.59 | 2.94 |
| 3.12 | 6.8 | 9.8  | 1.06 | 1.85 | 2.59 | 0.95 | 1.59 | 3.95 |
| 3.20 | 6.3 | 10.4 | 0.90 | 1.93 | 2.36 | 1.70 | 3.39 | 5.62 |
| 2.36 | 6.7 | 9.9  | 1.10 | 1.89 | 2.52 | 0.69 | 3.19 | 4.07 |
| 2.85 | 6.1 | 8.7  | 0.95 | 1.73 | 2.44 | 0.62 | 2.64 | 3.88 |
| 2.99 | 6.8 | 9.6  | 0.94 | 1.89 | 2.67 | 0.78 | 3.26 | 4.18 |
| 2.66 | 6.8 | 9.8  | 0.98 | 2.44 | 2.79 | 1.59 | 2.43 | 6.09 |
| 3.17 | 6.3 | 9.3  | 1.06 | 1.61 | 2.71 | 0.75 | 2.94 | 3.86 |
| 2.30 | 6.7 | 10.3 | 1.10 | 1.53 | 2.75 | 1.13 | 3.32 | 3.71 |
| 2.68 | 6.7 | 9.6  | 0.90 | 1.97 | 2.67 | 0.87 | 2.06 | 2.29 |
| 2.52 | 6.0 | 10.3 | 1.02 | 1.61 | 2.36 | 0.70 | 2.63 | 3.59 |
| 2.81 | 6.6 | 10.1 | 0.95 | 1.73 | 2.55 | 1.07 | 3.06 | 2.52 |
| 3.27 | 6.6 | 9.8  | 0.95 | 2.51 | 2.44 | 0.90 | 1.81 | 4.17 |
| 3.30 | 6.7 | 10.5 | 0.98 | 1.61 | 2.67 | 0.83 | 2.67 | 3.88 |
| 2.85 | 6.5 | 10.1 | 0.90 | 1.65 | 2.59 | 0.45 | 3.25 | 3.27 |
| 3.17 | 6.5 | 10.4 | 0.87 | 1.69 | 4.17 | 0.81 | 2.80 | 3.39 |

|      |     |      |      |      |      |      |      |      |
|------|-----|------|------|------|------|------|------|------|
| 3.13 | 6.6 | 10.2 | 0.90 | 1.45 | 2.36 | 1.44 | 3.24 | 2.67 |
| 3.31 | 6.1 | 9.8  | 1.02 | 1.30 | 2.52 | 0.68 | 2.39 | 3.15 |
| 3.17 | 6.4 | 9.8  | 0.90 | 2.05 | 1.85 | 1.07 | 2.39 | 2.28 |
| 3.19 | 6.7 | 10.3 | 0.98 | 1.54 | 1.89 | 1.85 | 2.80 | 3.63 |
| 3.00 | 5.3 | 10.3 | 0.87 | 1.85 | 1.34 | 0.78 | 3.30 | 3.30 |
| 3.13 | 6.6 | 10.4 | 0.90 | 1.77 | 3.11 | 0.87 | 2.33 | 3.07 |
| 3.22 | 6.6 | 10.2 | 0.98 | 2.01 | 2.64 | 0.85 | 1.60 | 3.84 |
| 3.01 | 3.6 | 8.6  | 1.10 | 1.85 | 2.87 | 0.96 | 1.71 | 3.29 |
| 3.17 | 2.8 | 9.9  | 0.98 | 1.93 | 3.11 | 1.17 | 1.82 | 4.37 |
| 3.12 | 7.1 | 10.3 | 1.06 | 2.01 | 3.11 | 1.50 | 1.88 | 4.32 |
| 3.11 | 7.1 | 8.8  | 0.90 | 1.57 | 2.95 | 0.72 | 1.52 | 2.95 |
| 3.16 | 6.3 | 5.5  | 0.98 | 2.01 | 3.11 | 1.24 | 1.01 | 0.50 |
| 3.17 | 6.8 | 10.1 | 1.06 | 1.85 | 3.19 | 1.06 | 2.66 | 4.17 |
| 3.22 | 6.8 | 9.5  | 1.26 | 1.49 | 2.68 | 1.06 | 2.88 | 2.87 |
| 3.39 | 6.8 | 10.4 | 0.90 | 1.77 | 2.91 | 0.76 | 2.08 | 3.60 |
| 3.34 | 7.0 | 10.3 | 0.95 | 1.93 | 3.11 | 0.92 | 1.69 | 3.77 |
| 3.15 | 7.0 | 10.2 | 0.90 | 1.93 | 2.75 | 0.55 | 3.82 | 3.87 |
| 3.25 | 6.9 | 9.9  | 0.98 | 1.77 | 2.83 | 1.45 | 1.92 | 3.26 |
| 3.02 | 6.5 | 6.6  | 1.14 | 2.09 | 2.91 | 0.83 | 4.89 | 4.22 |
| 3.25 | 6.9 | 10.1 | 0.90 | 1.89 | 2.80 | 1.20 | 1.48 | 3.74 |
| 3.12 | 6.9 | 10.0 | 0.98 | 1.69 | 2.91 | 0.86 | 2.22 | 4.47 |
| 3.39 | 6.8 | 10.4 | 1.06 | 1.93 | 2.95 | 0.95 | 1.04 | 2.78 |
| 3.17 | 6.7 | 9.9  | 0.87 | 1.49 | 3.19 | 1.19 | 2.89 | 3.54 |
| 2.96 | 6.8 | 10.2 | 1.43 | 1.62 | 3.03 | 0.67 | 1.39 | 1.94 |
| 3.20 | 6.7 | 9.7  | 1.02 | 1.77 | 2.75 | 1.45 | 1.79 | 1.06 |
| 3.25 | 6.5 | 9.7  | 1.10 | 1.81 | 2.80 | 1.08 | 1.34 | 2.97 |
| 3.29 | 6.5 | 6.3  | 1.02 | 1.85 | 2.36 | 0.99 | 1.67 | 4.33 |
| 3.26 | 6.3 | 10.1 | 1.11 | 1.85 | 2.95 | 0.82 | 3.24 | 4.27 |
| 3.21 | 6.6 | 10.2 | 1.18 | 1.89 | 2.80 | 1.00 | 2.91 | 2.42 |
| 2.85 | 7.0 | 10.3 | 1.11 | 1.89 | 2.87 | 0.81 | 1.37 | 3.54 |
| 3.16 | 6.8 | 8.3  | 0.95 | 1.61 | 2.91 | 1.23 | 2.44 | 4.64 |
| 2.91 | 6.9 | 9.9  | 1.07 | 1.97 | 2.75 | 0.73 | 3.98 | 3.18 |
| 2.74 | 6.7 | 10.1 | 1.36 | 1.97 | 2.95 | 1.00 | 2.57 | 2.24 |
| 2.61 | 6.9 | 10.2 | 0.99 | 1.96 | 2.95 | 1.24 | 2.26 | 2.25 |
| 2.50 | 6.9 | 9.9  | 1.03 | 1.77 | 3.03 | 1.01 | 1.97 | 2.38 |

|      |     |      |      |      |      |      |      |      |
|------|-----|------|------|------|------|------|------|------|
| 2.31 | 6.5 | 10.1 | 1.02 | 1.73 | 2.75 | 0.89 | 2.75 | 3.58 |
| 3.06 | 7.0 | 10.3 | 0.87 | 1.93 | 2.95 | 0.56 | 1.14 | 2.68 |
| 2.30 | 6.8 | 10.0 | 0.96 | 2.08 | 2.79 | 0.56 | 0.61 | 4.39 |
| 3.14 | 6.6 | 10.2 | 1.15 | 1.81 | 2.75 | 0.80 | 2.64 | 4.60 |
| 3.23 | 6.7 | 10.4 | 1.18 | 1.81 | 2.83 | 0.78 | 3.22 | 3.38 |
| 3.16 | 6.6 | 9.9  | 0.88 | 1.69 | 2.36 | 1.06 | 2.04 | 3.08 |
| 3.19 | 6.6 | 8.4  | 1.07 | 1.49 | 2.80 | 1.56 | 2.97 | 2.38 |
| 3.30 | 5.6 | 9.9  | 0.99 | 1.85 | 3.27 | 0.46 | 2.01 | 2.26 |
| 3.25 | 4.6 | 9.7  | 0.95 | 1.93 | 2.52 | 0.96 | 3.01 | 5.23 |
| 3.23 | 6.9 | 10.0 | 0.79 | 1.57 | 2.72 | 0.65 | 3.16 | 2.50 |
| 2.98 | 6.3 | 9.8  | 0.95 | 2.00 | 2.60 | 0.96 | 2.27 | 5.85 |
| 3.22 | 6.9 | 7.4  | 0.87 | 1.89 | 2.80 | 1.06 | 2.92 | 2.22 |
| 3.06 | 6.0 | 9.6  | 0.99 | 2.01 | 2.87 | 1.06 | 2.03 | 2.92 |
| 3.11 | 6.7 | 9.7  | 0.88 | 1.85 | 2.63 | 0.76 | 1.77 | 1.62 |
| 3.17 | 6.6 | 8.7  | 0.79 | 1.85 | 2.91 | 0.92 | 2.73 | 3.62 |
| 3.42 | 6.2 | 9.1  | 0.87 | 1.85 | 3.03 | 0.55 | 3.54 | 2.44 |
| 3.17 | 6.4 | 9.9  | 1.02 | 1.89 | 2.68 | 1.45 | 3.93 | 2.94 |
| 3.17 | 3.9 | 9.4  | 0.95 | 1.62 | 2.80 | 0.83 | 2.60 | 1.94 |
| 2.91 | 3.1 | 9.3  | 0.87 | 1.57 | 3.11 | 1.20 | 2.57 | 2.44 |
| 3.06 | 1.8 | 10.1 | 1.19 | 1.62 | 2.80 | 0.86 | 1.63 | 3.83 |
| 3.19 | 6.6 | 8.1  | 1.10 | 2.01 | 2.95 | 0.95 | 2.30 | 2.06 |
| 3.29 | 6.3 | 10.2 | 1.18 | 1.69 | 2.72 | 1.19 | 3.37 | 4.27 |
| 3.15 | 6.6 | 10.1 | 1.19 | 1.69 | 2.64 | 0.67 | 1.67 | 3.11 |
| 3.34 | 6.7 | 10.1 | 0.96 | 1.61 | 2.80 | 1.45 | 2.88 | 4.47 |
| 3.18 | 6.5 | 9.5  | 1.03 | 1.73 | 2.83 | 1.08 | 2.63 | 3.26 |
| 3.25 | 6.7 | 10.2 | 1.03 | 1.62 | 2.52 | 0.99 | 1.45 | 2.27 |
| 2.95 | 6.4 | 10.3 | 1.03 | 1.73 | 3.11 | 0.82 | 2.53 | 2.97 |
| 3.27 | 6.5 | 10.4 | 1.11 | 1.57 | 2.75 | 1.00 | 3.31 | 2.49 |
| 3.18 | 6.5 | 10.3 | 0.83 | 1.46 | 2.95 | 0.81 | 2.30 | 1.41 |
| 3.19 | 6.4 | 10.4 | 0.75 | 1.46 | 2.87 | 1.23 | 2.74 | 2.32 |
| 2.90 | 6.3 | 7.0  | 1.02 | 1.65 | 2.87 | 0.73 | 2.41 | 3.74 |
| 3.08 | 6.6 | 9.9  | 1.02 | 1.02 | 2.36 | 1.00 | 1.62 | 2.59 |
| 3.42 | 6.5 | 10.3 | 0.95 | 2.36 | 2.60 | 1.24 | 1.87 | 2.44 |
| 3.11 | 6.7 | 10.2 | 0.95 | 1.49 | 2.04 | 1.01 | 1.56 | 2.34 |
| 3.26 | 6.7 | 9.5  | 0.75 | 1.81 | 1.89 | 0.89 | 2.98 | 4.01 |

|      |     |      |      |      |      |      |      |      |
|------|-----|------|------|------|------|------|------|------|
| 3.21 | 6.7 | 7.6  | 0.95 | 1.86 | 3.54 | 0.56 | 1.95 | 2.36 |
| 3.38 | 6.5 | 9.9  | 0.87 | 1.71 | 3.03 | 0.56 | 1.93 | 2.58 |
| 3.17 | 6.8 | 7.7  | 0.99 | 1.78 | 2.21 | 1.45 | 1.82 | 0.87 |
| 3.06 | 6.7 | 2.1  | 0.87 | 1.86 | 2.72 | 0.88 | 2.06 | 2.94 |
| 3.08 | 6.8 | 3.0  | 0.87 | 1.86 | 2.19 | 0.97 | 1.57 | 3.73 |
| 2.93 | 6.5 | 2.2  | 1.03 | 2.06 | 2.54 | 0.45 | 3.10 | 2.53 |
| 3.21 | 6.6 | 9.9  | 0.95 | 1.99 | 2.68 | 0.50 | 0.56 | 2.95 |
| 2.43 | 6.6 | 9.8  | 1.02 | 1.99 | 2.73 | 1.06 | 3.28 | 3.71 |
| 3.31 | 6.7 | 9.9  | 0.95 | 2.19 | 2.73 | 0.85 | 3.47 | 1.61 |
| 3.29 | 6.2 | 9.2  | 1.02 | 1.99 | 2.50 | 1.02 | 2.04 | 1.28 |
| 3.04 | 5.2 | 9.6  | 1.15 | 1.87 | 2.89 | 1.17 | 2.50 | 3.52 |
| 3.00 | 6.7 | 10.1 | 1.23 | 1.89 | 2.58 | 0.57 | 6.72 | 3.90 |
| 3.29 | 6.3 | 9.9  | 1.15 | 1.90 | 2.49 | 1.17 | 2.71 | 2.45 |
| 2.94 | 6.4 | 9.8  | 1.07 | 1.98 | 2.14 | 1.13 | 4.33 | 3.70 |
| 3.30 | 6.6 | 10.2 | 1.02 | 1.98 | 2.30 | 0.67 | 1.71 | 3.93 |
| 3.01 | 6.6 | 9.6  | 1.11 | 1.99 | 2.53 | 0.46 | 2.36 | 3.18 |
| 3.27 | 6.6 | 10.0 | 1.11 | 1.86 | 2.49 | 0.81 | 3.32 | 1.52 |
| 3.29 | 3.7 | 10.1 | 1.08 | 1.71 | 2.54 | 0.85 | 1.58 | 3.42 |
| 3.20 | 6.9 | 10.2 | 1.07 | 1.91 | 2.42 | 0.95 | 2.67 | 3.73 |
| 3.36 | 5.9 | 10.1 | 0.99 | 1.78 | 2.22 | 0.75 | 1.79 | 3.19 |
| 3.29 | 6.0 | 9.6  | 0.87 | 1.94 | 2.54 | 0.56 | 2.29 | 4.34 |
| 3.34 | 6.4 | 9.4  | 0.91 | 2.07 | 2.68 | 0.78 | 2.62 | 4.90 |
| 3.27 | 6.7 | 10.1 | 0.79 | 1.94 | 2.61 | 0.56 | 1.96 | 2.71 |
| 3.36 | 6.6 | 10.3 | 0.95 | 1.81 | 2.68 | 0.91 | 0.89 | 3.06 |
| 3.34 | 3.7 | 10.4 | 0.96 | 1.94 | 2.40 | 1.27 | 3.43 | 3.10 |
| 3.42 | 2.9 | 10.1 | 0.99 | 1.99 | 2.82 | 0.84 | 2.86 | 1.88 |
| 3.29 | 6.8 | 9.2  | 0.91 | 1.71 | 2.73 | 0.77 | 1.42 | 2.68 |
| 3.22 | 6.2 | 5.5  | 1.03 | 1.79 | 2.73 | 0.80 | 1.13 | 4.26 |
| 3.15 | 6.7 | 7.2  | 0.76 | 1.94 | 2.57 | 0.78 | 1.28 | 3.83 |
| 3.19 | 6.6 | 10.1 | 1.15 | 1.81 | 2.33 | 1.06 | 0.80 | 3.55 |
| 3.12 | 6.7 | 10.4 | 0.96 | 1.94 | 2.56 | 1.56 | 2.68 | 1.81 |
| 3.22 | 6.5 | 9.7  | 1.03 | 1.82 | 2.70 | 0.46 | 2.51 | 0.44 |
| 3.01 | 6.7 | 10.0 | 1.02 | 1.39 | 2.28 | 0.96 | 3.10 | 3.29 |
| 3.23 | 6.7 | 9.0  | 0.79 | 1.79 | 2.42 | 0.65 | 2.23 | 2.91 |
| 2.74 | 6.5 | 9.8  | 0.83 | 1.74 | 2.78 | 0.96 | 2.85 | 2.09 |

|      |     |      |      |      |      |      |      |      |
|------|-----|------|------|------|------|------|------|------|
| 3.29 | 6.5 | 9.7  | 1.11 | 1.81 | 2.73 | 0.58 | 3.11 | 2.84 |
| 3.21 | 5.0 | 5.3  | 0.80 | 1.58 | 2.77 | 0.72 | 2.00 | 3.84 |
| 3.25 | 6.6 | 5.3  | 0.87 | 1.90 | 2.77 | 1.00 | 3.23 | 4.64 |
| 3.22 | 6.6 | 9.6  | 1.08 | 1.38 | 2.81 | 1.07 | 1.62 | 2.64 |
| 3.31 | 6.5 | 9.9  | 0.99 | 1.74 | 2.70 | 0.82 | 1.62 | 3.01 |
| 2.56 | 6.5 | 9.8  | 0.95 | 1.86 | 2.70 | 0.56 | 3.23 | 9.00 |
| 3.36 | 6.6 | 9.9  | 0.79 | 1.74 | 2.45 | 1.09 | 1.89 | 3.78 |
| 3.50 | 6.5 | 10.3 | 0.96 | 1.79 | 2.98 | 0.94 | 3.29 | 5.78 |
| 3.48 | 6.4 | 10.0 | 0.91 | 1.91 | 2.47 | 0.69 | 1.53 | 2.30 |
| 2.37 | 6.5 | 8.0  | 1.08 | 2.09 | 2.25 | 1.23 | 1.84 | 2.93 |
| 3.16 | 6.2 | 9.8  | 0.96 | 2.13 | 2.54 | 0.70 | 3.92 | 4.31 |
| 2.86 | 6.6 | 9.4  | 1.11 | 1.69 | 2.25 | 1.06 | 3.52 | 2.92 |
| 3.23 | 6.6 | 9.9  | 1.07 | 1.98 | 2.42 | 0.61 | 3.17 | 2.80 |
| 3.04 | 6.7 | 10.1 | 1.03 | 1.71 | 2.73 | 0.61 | 5.56 | 2.32 |
| 3.25 | 6.7 | 6.8  | 1.10 | 1.54 | 2.67 | 0.95 | 2.06 | 2.99 |
| 2.78 | 6.7 | 9.6  | 0.96 | 1.83 | 2.73 | 1.30 | 3.68 | 3.17 |
| 3.26 | 6.8 | 5.8  | 1.03 | 1.99 | 2.37 | 0.95 | 2.32 | 2.09 |
| 3.15 | 4.0 | 5.8  | 1.00 | 2.06 | 2.48 | 1.02 | 2.39 | 1.28 |
| 3.22 | 6.7 | 10.1 | 1.03 | 1.78 | 2.75 | 1.50 | 4.29 | 4.40 |
| 2.91 | 5.3 | 9.8  | 1.08 | 1.89 | 2.98 | 1.03 | 3.37 | 3.48 |
| 3.17 | 6.7 | 8.6  | 1.19 | 1.46 | 2.66 | 0.80 | 2.06 | 2.39 |
| 3.10 | 4.0 | 10.4 | 0.79 | 1.54 | 2.77 | 0.79 | 2.03 | 2.06 |
| 3.15 | 6.7 | 9.5  | 1.15 | 1.43 | 1.87 | 1.06 | 1.66 | 4.08 |
| 3.31 | 6.6 | 2.9  | 0.91 | 0.79 | 2.54 | 0.57 | 1.72 | 5.77 |
| 2.96 | 6.1 | 10.1 | 1.03 | 0.95 | 1.78 | 1.06 | 2.29 | 5.06 |
| 3.20 | 4.3 | 10.2 | 1.15 | 1.34 | 1.79 | 0.61 | 1.82 | 2.92 |
| 3.27 | 5.8 | 10.1 | 1.30 | 1.23 | 2.26 | 1.02 | 0.97 | 3.01 |
| 2.88 | 6.7 | 9.0  | 1.11 | 1.23 | 2.17 | 1.14 | 0.99 | 3.29 |
| 3.25 | 5.0 | 10.2 | 1.07 | 1.59 | 2.13 | 0.50 | 0.72 | 1.99 |
| 3.32 | 6.6 | 10.2 | 1.02 | 1.31 | 2.30 | 1.58 | 2.06 | 3.11 |
| 2.50 | 6.2 | 10.6 | 1.08 | 1.38 | 2.05 | 0.95 | 4.45 | 2.94 |
| 3.25 | 6.0 | 9.6  | 1.16 | 1.51 | 2.33 | 0.82 | 2.61 | 3.12 |
| 3.00 | 6.1 | 10.2 | 1.11 | 1.47 | 2.07 | 0.62 | 2.33 | 2.66 |
| 3.36 | 6.0 | 10.2 | 0.88 | 1.34 | 1.91 | 0.67 | 2.41 | 3.11 |
| 2.93 | 6.6 | 10.3 | 1.11 | 1.38 | 2.41 | 1.10 | 3.18 | 1.64 |

|      |     |      |      |      |      |      |      |      |
|------|-----|------|------|------|------|------|------|------|
| 3.06 | 6.6 | 9.6  | 0.96 | 0.99 | 2.02 | 0.73 | 1.80 | 1.94 |
| 2.89 | 6.5 | 10.1 | 0.91 | 1.94 | 2.40 | 0.45 | 1.06 | 7.17 |
| 3.17 | 6.6 | 9.5  | 1.03 | 1.91 | 3.15 | 1.56 | 2.18 | 1.02 |
| 2.88 | 6.2 | 10.1 | 1.08 | 1.54 | 3.18 | 0.67 | 2.45 | 1.30 |
| 3.17 | 6.0 | 6.9  | 1.00 | 2.03 | 3.07 | 1.10 | 3.57 | 4.75 |
| 3.13 | 6.6 | 10.2 | 0.99 | 1.91 | 3.25 | 0.56 | 4.33 | 2.83 |
| 3.18 | 6.5 | 6.5  | 1.02 | 1.78 | 2.38 | 0.53 | 1.48 | 3.94 |
| 3.31 | 5.9 | 10.3 | 0.83 | 1.94 | 2.80 | 0.78 | 2.70 | 4.02 |
| 3.20 | 6.6 | 6.1  | 0.87 | 1.74 | 2.98 | 0.86 | 2.56 | 4.89 |
| 3.17 | 6.4 | 6.1  | 1.07 | 1.87 | 3.12 | 0.99 | 2.74 | 2.14 |
| 3.24 | 6.2 | 9.7  | 1.15 | 1.94 | 3.07 | 1.18 | 1.68 | 4.17 |
| 3.25 | 6.5 | 10.3 | 1.03 | 2.25 | 3.20 | 1.03 | 1.67 | 2.67 |
| 3.27 | 6.7 | 10.3 | 0.87 | 1.62 | 3.27 | 0.68 | 2.16 | 2.41 |
| 3.20 | 6.7 | 8.6  | 0.83 | 2.19 | 2.87 | 1.22 | 2.32 | 4.44 |
| 3.26 | 6.3 | 8.7  | 1.30 | 1.99 | 3.07 | 0.99 | 5.92 | 3.77 |
| 3.24 | 5.6 | 7.3  | 1.15 | 1.94 | 3.47 | 0.79 | 3.08 | 2.67 |
| 3.22 | 6.5 | 10.0 | 1.03 | 1.94 | 3.16 | 1.55 | 1.94 | 4.01 |
| 3.15 | 6.5 | 9.8  | 0.79 | 2.06 | 3.12 | 1.43 | 2.39 | 3.26 |
| 3.26 | 6.4 | 10.5 | 1.15 | 1.74 | 3.22 | 0.63 | 2.57 | 4.02 |
| 3.16 | 6.6 | 10.2 | 1.15 | 1.71 | 3.08 | 1.67 | 2.17 | 2.45 |
| 2.04 | 6.3 | 10.1 | 0.96 | 1.78 | 2.96 | 0.72 | 1.67 | 2.57 |
| 2.16 | 6.1 | 10.1 | 1.11 | 1.74 | 2.98 | 1.03 | 2.60 | 0.97 |
| 3.04 | 6.6 | 9.6  | 1.23 | 1.94 | 3.44 | 1.31 | 2.33 | 0.61 |
| 2.46 | 6.6 | 10.2 | 1.11 | 1.86 | 3.26 | 1.50 | 2.01 | 0.77 |
| 3.25 | 5.6 | 10.5 | 1.15 | 1.81 | 3.00 | 0.97 | 3.35 | 1.02 |
| 2.01 | 6.6 | 10.2 | 1.08 | 1.74 | 2.73 | 1.45 | 3.32 | 5.67 |
| 2.26 | 6.5 | 5.6  | 1.16 | 1.98 | 3.09 | 1.08 | 1.89 | 3.39 |
| 3.04 | 6.7 | 5.2  | 1.02 | 1.91 | 3.07 | 1.00 | 1.50 | 2.88 |
| 3.01 | 5.9 | 6.4  | 1.08 | 1.86 | 3.04 | 1.17 | 1.87 | 2.68 |
| 3.13 | 6.6 | 9.9  | 1.10 | 2.11 | 3.12 | 0.95 | 2.97 | 4.07 |
| 3.11 | 6.7 | 6.6  | 1.07 | 2.03 | 2.87 | 1.05 | 3.05 | 2.51 |
| 3.02 | 6.8 | 5.1  | 1.07 | 1.82 | 2.47 | 0.78 | 1.44 | 1.45 |
| 3.10 | 6.2 | 9.5  | 0.95 | 1.83 | 3.16 | 0.83 | 1.31 | 2.56 |
| 3.04 | 6.6 | 9.9  | 0.87 | 1.91 | 2.80 | 0.50 | 2.01 | 3.11 |
| 3.32 | 6.7 | 9.9  | 0.87 | 1.94 | 2.98 | 1.07 | 2.57 | 4.40 |

|      |     |      |      |      |      |      |      |      |
|------|-----|------|------|------|------|------|------|------|
| 3.15 | 4.7 | 9.8  | 0.88 | 1.71 | 3.15 | 0.86 | 0.98 | 6.55 |
| 2.80 | 6.8 | 10.1 | 1.07 | 1.81 | 2.88 | 1.06 | 4.59 | 1.93 |
| 3.11 | 6.6 | 9.8  | 1.02 | 1.90 | 2.71 | 0.83 | 2.50 | 3.12 |
| 3.10 | 6.1 | 9.6  | 1.23 | 1.94 | 3.05 | 1.00 | 3.21 | 3.45 |
| 2.97 | 4.4 | 9.9  | 1.18 | 1.70 | 2.89 | 1.00 | 2.07 | 3.55 |
| 3.11 | 6.5 | 9.9  | 1.23 | 1.22 | 2.80 | 0.86 | 4.16 | 2.30 |
| 3.06 | 6.7 | 10.0 | 0.95 | 1.59 | 2.49 | 0.56 | 2.72 | 2.31 |
| 3.13 | 6.6 | 9.8  | 1.22 | 1.74 | 2.57 | 0.45 | 0.63 | 3.11 |
| 2.97 | 6.5 | 9.7  | 1.42 | 1.81 | 2.88 | 1.39 | 2.17 | 2.99 |
| 3.20 | 6.8 | 9.9  | 1.22 | 2.02 | 3.04 | 0.69 | 0.93 | 6.84 |
| 3.11 | 6.6 | 9.8  | 1.15 | 1.71 | 3.27 | 0.92 | 0.97 | 1.27 |
| 3.09 | 6.3 | 10.2 | 1.03 | 1.91 | 3.01 | 0.57 | 2.44 | 1.90 |
| 2.99 | 6.4 | 10.0 | 1.07 | 2.03 | 3.12 | 1.00 | 3.13 | 3.88 |
| 3.02 | 6.6 | 9.3  | 1.16 | 1.90 | 2.53 | 0.79 | 2.49 | 4.03 |
| 2.96 | 5.7 | 10.1 | 1.03 | 1.90 | 2.98 | 0.56 | 3.28 | 2.11 |
| 2.92 | 4.8 | 10.2 | 1.22 | 1.78 | 2.92 | 1.20 | 2.78 | 1.60 |
| 3.09 | 4.7 | 9.8  | 1.23 | 1.66 | 2.85 | 0.73 | 0.99 | 1.69 |
| 3.06 | 4.5 | 9.8  | 1.19 | 1.98 | 3.00 | 1.13 | 2.81 | 3.45 |
| 3.09 | 5.0 | 10.0 | 0.99 | 1.86 | 2.99 | 1.06 | 0.79 | 4.73 |
| 2.88 | 2.5 | 9.6  | 1.03 | 2.01 | 2.73 | 0.95 | 2.91 | 2.75 |
| 2.90 | 2.2 | 10.1 | 1.11 | 1.51 | 2.34 | 0.50 | 2.18 | 2.70 |
| 3.06 | 6.5 | 9.9  | 1.11 | 1.78 | 3.33 | 2.05 | 2.04 | 4.10 |
| 3.18 | 6.7 | 10.2 | 1.23 | 1.71 | 3.02 | 1.13 | 1.81 | 1.54 |
| 3.18 | 6.7 | 10.1 | 1.15 | 1.58 | 3.15 | 1.17 | 3.46 | 3.72 |
| 2.71 | 5.8 | 9.5  | 1.03 | 1.90 | 3.09 | 0.79 | 1.33 | 2.28 |
| 2.81 | 6.8 | 9.6  | 1.15 | 1.66 | 2.98 | 0.72 | 2.17 | 4.71 |
| 3.08 | 6.6 | 9.7  | 1.23 | 1.86 | 2.96 | 0.73 | 1.94 | 3.77 |
| 3.16 | 6.9 | 10.2 | 1.27 | 1.54 | 3.12 | 0.74 | 1.41 | 4.38 |
| 2.39 | 6.8 | 10.1 | 1.27 | 1.50 | 2.85 | 0.57 | 1.99 | 2.92 |
| 2.99 | 6.6 | 9.2  | 1.16 | 1.78 | 2.53 | 1.14 | 3.88 | 2.74 |
| 2.20 | 6.5 | 7.7  | 1.08 | 1.90 | 3.19 | 0.62 | 4.73 | 1.94 |
| 2.92 | 6.6 | 10.1 | 1.02 | 1.66 | 2.88 | 0.59 | 4.84 | 3.30 |
| 3.16 | 6.1 | 4.9  | 0.91 | 2.19 | 2.91 | 0.58 | 2.00 | 2.60 |
| 2.97 | 6.3 | 9.4  | 0.99 | 2.02 | 2.59 | 0.61 | 5.73 | 2.09 |
| 3.00 | 6.2 | 9.6  | 0.76 | 1.91 | 2.37 | 1.05 | 2.72 | 3.61 |

|      |      |      |      |      |      |      |      |      |
|------|------|------|------|------|------|------|------|------|
| 3.15 | 6.7  | 10.0 | 1.02 | 1.89 | 3.24 | 0.61 | 2.06 | 3.27 |
| 3.20 | 6.6  | 9.3  | 1.02 | 1.86 | 2.72 | 0.62 | 2.20 | 2.94 |
| 3.22 | 6.2  | 9.4  | 0.95 | 1.30 | 2.85 | 0.76 | 3.61 | 4.39 |
| 3.31 | 6.7  | 9.7  | 0.91 | 1.62 | 2.26 | 0.51 | 3.19 | 3.72 |
| 3.02 | 6.7  | 9.2  | 0.83 | 1.71 | 2.73 | 0.88 | 1.80 | 3.18 |
| 3.16 | 6.6  | 10.2 | 1.08 | 1.28 | 2.39 | 0.67 | 4.32 | 3.85 |
| 3.18 | 6.7  | 8.2  | 1.11 | 1.74 | 2.50 | 1.23 | 2.91 | 2.19 |
| 3.04 | 6.8  | 1.6  | 1.20 | 1.83 | 3.02 | 0.90 | 2.95 | 0.92 |
| 3.16 | 6.7  | 10.1 | 1.11 | 1.54 | 2.80 | 1.24 | 2.30 | 0.90 |
| 2.97 | 6.3  | 9.9  | 0.96 | 2.17 | 2.34 | 0.88 | 1.55 | 3.50 |
| 3.26 | 6.8  | 10.3 | 1.31 | 1.81 | 1.99 | 1.72 | 3.34 | 3.74 |
| 3.11 | 6.6  | 10.2 | 1.03 | 2.06 | 2.31 | 1.11 | 1.85 | 2.81 |
| 3.10 | 6.7  | 10.2 | 1.11 | 1.90 | 2.51 | 0.95 | 2.17 | 4.31 |
| 3.01 | 4.9  | 9.9  | 0.91 | 1.86 | 2.80 | 1.62 | 1.99 | 3.06 |
| 3.22 | 6.8  | 10.0 | 1.19 | 1.86 | 2.53 | 2.35 | 3.84 | 2.14 |
| 2.97 | 6.3  | 9.4  | 0.91 | 1.74 | 2.42 | 0.95 | 3.26 | 3.72 |
| 3.22 | 5.9  | 10.3 | 1.08 | 1.79 | 2.37 | 1.12 | 3.56 | 2.05 |
| 3.09 | 6.1  | 9.9  | 0.99 | 1.42 | 2.54 | 0.83 | 2.27 | 3.83 |
| 2.92 | 5.6  | 10.0 | 1.07 | 1.86 | 2.69 | 0.57 | 2.28 | 2.68 |
| 3.26 | 4.4  | 10.1 | 1.03 | 2.03 | 2.47 | 0.95 | 2.99 | 2.57 |
| 3.26 | 6.4  | 10.4 | 1.31 | 1.79 | 2.25 | 0.83 | 1.69 | 2.22 |
| 3.02 | 6.3  | 9.9  | 1.11 | 1.83 | 2.65 | 1.11 | 1.27 | 4.34 |
| 3.09 | 11.7 | 9.6  | 1.20 | 1.89 | 2.72 | 0.56 | 2.31 | 2.09 |
| 3.18 | 6.7  | 10.4 | 0.91 | 1.90 | 2.53 | 0.85 | 1.88 | 5.61 |
| 3.17 | 5.0  | 10.3 | 1.03 | 1.83 | 2.67 | 0.95 | 1.74 | 2.71 |
| 3.19 | 2.6  | 5.3  | 0.99 | 1.79 | 2.33 | 0.56 | 2.29 | 6.05 |
| 3.16 | 3.9  | 10.1 | 1.00 | 1.99 | 2.19 | 1.83 | 4.27 | 3.75 |
| 3.19 | 3.0  | 10.0 | 0.96 | 1.81 | 2.67 | 1.24 | 2.65 | 4.11 |
| 3.10 | 3.5  | 9.6  | 0.99 | 1.74 | 2.65 | 0.62 | 2.99 | 3.84 |
| 2.86 | 3.5  | 6.1  | 0.71 | 1.87 | 2.76 | 1.01 | 1.53 | 2.82 |
| 2.32 | 2.3  | 8.8  | 1.07 | 1.89 | 2.37 | 0.60 | 1.11 | 2.45 |
| 3.06 | 6.5  | 9.5  | 0.91 | 1.71 | 2.76 | 0.97 | 3.06 | 2.89 |
| 3.06 | 6.7  | 9.4  | 1.11 | 1.81 | 2.81 | 0.72 | 2.43 | 3.21 |
| 2.67 | 7.0  | 10.2 | 0.91 | 1.91 | 2.53 | 0.80 | 3.54 | 3.22 |
| 3.02 | 6.7  | 10.2 | 0.83 | 1.76 | 2.72 | 0.59 | 2.50 | 2.85 |

|      |     |      |      |      |      |      |      |      |
|------|-----|------|------|------|------|------|------|------|
| 2.89 | 7.0 | 10.1 | 1.23 | 1.74 | 2.96 | 0.78 | 1.10 | 2.70 |
| 2.74 | 6.5 | 8.2  | 0.99 | 1.79 | 2.71 | 0.72 | 2.28 | 2.37 |
| 1.72 | 6.5 | 10.0 | 0.91 | 1.98 | 2.47 | 1.31 | 3.56 | 3.63 |
| 2.71 | 6.5 | 9.8  | 1.05 | 2.09 | 2.45 | 0.57 | 3.36 | 2.52 |
| 2.99 | 6.8 | 10.5 | 1.15 | 1.66 | 2.72 | 0.79 | 2.30 | 4.07 |
| 2.09 | 6.6 | 9.2  | 0.91 | 1.74 | 2.60 | 0.70 | 2.24 | 3.19 |
| 2.89 | 6.8 | 9.9  | 1.15 | 2.02 | 2.58 | 0.63 | 2.60 | 2.64 |
| 2.91 | 6.8 | 10.3 | 1.11 | 1.63 | 2.73 | 1.79 | 2.71 | 5.23 |
| 1.85 | 6.7 | 10.2 | 0.80 | 1.66 | 2.69 | 1.02 | 2.64 | 2.56 |
| 1.23 | 6.8 | 9.7  | 1.15 | 1.81 | 2.65 | 1.45 | 1.90 | 3.69 |
| 2.09 | 6.8 | 9.4  | 1.19 | 1.79 | 2.76 | 3.47 | 2.61 | 6.84 |
| 3.24 | 6.9 | 9.9  | 0.99 | 1.74 | 2.89 | 0.80 | 2.34 | 2.77 |
| 3.20 | 6.9 | 9.3  | 1.11 | 1.66 | 2.80 | 1.22 | 1.66 | 2.71 |
| 3.15 | 6.1 | 8.8  | 1.11 | 1.59 | 2.60 | 1.14 | 1.34 | 3.98 |
| 3.09 | 5.3 | 4.0  | 0.92 | 1.74 | 2.61 | 1.27 | 2.39 | 3.88 |
| 3.15 | 6.8 | 10.2 | 1.05 | 1.99 | 2.84 | 0.74 | 2.52 | 2.20 |
| 3.00 | 6.9 | 10.3 | 1.03 | 1.86 | 2.65 | 0.72 | 1.74 | 5.30 |
| 3.22 | 6.5 | 9.2  | 0.79 | 1.91 | 2.89 | 1.11 | 1.85 | 2.87 |
| 3.00 | 6.7 | 10.2 | 0.91 | 1.71 | 2.72 | 1.29 | 0.75 | 4.75 |
| 3.16 | 6.7 | 9.1  | 1.05 | 1.74 | 2.76 | 2.13 | 1.01 | 2.78 |
| 3.25 | 6.8 | 9.3  | 1.27 | 1.78 | 2.60 | 0.87 | 2.28 | 2.71 |
| 3.02 | 7.0 | 9.5  | 1.03 | 1.58 | 2.80 | 0.85 | 2.19 | 1.83 |
| 3.08 | 6.7 | 9.8  | 0.99 | 2.14 | 2.80 | 0.68 | 2.00 | 2.97 |
| 3.01 | 6.5 | 9.9  | 1.03 | 1.94 | 2.73 | 1.06 | 2.79 | 2.45 |
| 2.85 | 6.4 | 10.3 | 1.08 | 1.91 | 2.79 | 1.18 | 1.07 | 2.44 |
| 2.66 | 6.6 | 10.0 | 0.96 | 1.66 | 2.54 | 1.79 | 3.45 | 5.55 |
| 3.26 | 6.3 | 10.0 | 1.26 | 1.90 | 2.98 | 0.89 | 3.74 | 3.71 |
| 2.62 | 6.5 | 10.3 | 1.11 | 2.06 | 2.80 | 1.11 | 1.55 | 3.36 |
| 3.06 | 6.9 | 10.3 | 1.15 | 1.94 | 2.46 | 1.08 | 2.75 | 2.32 |
| 3.20 | 6.8 | 10.1 | 1.06 | 1.62 | 2.82 | 1.50 | 4.67 | 1.89 |
| 3.17 | 6.7 | 10.2 | 1.10 | 1.74 | 2.65 | 1.47 | 1.82 | 4.17 |
| 2.99 | 7.0 | 10.2 | 1.02 | 1.56 | 2.50 | 0.67 | 2.03 | 3.48 |
| 3.16 | 7.1 | 7.6  | 1.22 | 1.70 | 2.45 | 0.57 | 1.65 | 4.79 |
| 3.10 | 6.7 | 7.7  | 1.10 | 1.30 | 2.33 | 1.45 | 1.34 | 3.62 |
| 3.04 | 6.9 | 7.5  | 1.27 | 1.10 | 1.51 | 0.62 | 2.02 | 1.73 |

|      |     |      |      |      |      |      |      |      |
|------|-----|------|------|------|------|------|------|------|
| 3.04 | 6.4 | 5.4  | 1.07 | 1.22 | 2.58 | 0.77 | 3.13 | 3.23 |
| 3.13 | 5.6 | 8.4  | 1.11 | 0.76 | 2.78 | 0.50 | 2.72 | 4.34 |
| 3.10 | 7.1 | 8.8  | 1.07 | 0.59 | 1.89 | 1.13 | 2.66 | 4.55 |
| 2.60 | 6.7 | 8.5  | 1.15 | 1.87 | 1.94 | 1.35 | 1.06 | 2.96 |
| 2.96 | 6.5 | 10.3 | 1.07 | 1.87 | 2.67 | 0.50 | 1.73 | 3.16 |
| 3.11 | 6.0 | 10.4 | 1.22 | 2.00 | 1.56 | 0.67 | 2.13 | 4.17 |
| 3.06 | 6.4 | 10.1 | 0.99 | 1.90 | 1.51 | 1.56 | 0.74 | 2.76 |
| 3.19 | 6.4 | 9.5  | 0.99 | 1.67 | 3.11 | 0.99 | 3.32 | 1.55 |
| 3.16 | 6.3 | 10.0 | 1.06 | 1.91 | 3.01 | 0.73 | 2.71 | 3.44 |
| 2.96 | 6.5 | 10.0 | 0.99 | 1.87 | 3.61 | 0.56 | 2.33 | 3.55 |
| 3.21 | 3.3 | 9.5  | 1.15 | 1.90 | 2.98 | 0.88 | 4.92 | 3.31 |
| 2.53 | 6.6 | 9.6  | 1.27 | 1.94 | 2.64 | 0.73 | 1.59 | 2.71 |
| 3.22 | 6.2 | 9.3  | 1.15 | 1.93 | 3.02 | 0.50 | 2.97 | 3.08 |
| 2.99 | 6.5 | 9.8  | 1.15 | 1.83 | 2.86 | 1.00 | 2.79 | 2.47 |
| 2.92 | 6.6 | 10.3 | 1.02 | 1.83 | 3.21 | 0.95 | 2.57 | 1.47 |
| 3.04 | 6.5 | 9.5  | 0.87 | 1.94 | 3.01 | 1.06 | 3.18 | 2.53 |
| 2.81 | 6.5 | 10.1 | 1.26 | 1.27 | 3.18 | 0.72 | 2.91 | 2.24 |
| 2.68 | 6.5 | 7.0  | 1.06 | 1.82 | 2.80 | 1.16 | 2.41 | 3.22 |
| 3.16 | 5.8 | 2.5  | 1.18 | 1.70 | 2.81 | 1.47 | 2.20 | 2.83 |
| 3.18 | 6.5 | 9.8  | 0.83 | 1.83 | 2.99 | 1.19 | 4.13 | 1.69 |
| 3.23 | 6.4 | 9.6  | 1.22 | 1.94 | 3.01 | 1.02 | 2.63 | 2.04 |
| 2.74 | 6.6 | 9.5  | 1.18 | 1.68 | 2.33 | 0.70 | 2.44 | 3.07 |
| 2.39 | 6.4 | 10.0 | 1.14 | 1.80 | 2.87 | 0.57 | 2.67 | 1.73 |
| 2.96 | 6.8 | 10.3 | 0.83 | 1.78 | 2.81 | 1.26 | 3.14 | 2.34 |
| 2.91 | 6.2 | 10.1 | 0.99 | 2.02 | 2.93 | 1.35 | 2.57 | 6.12 |
| 2.55 | 6.3 | 10.1 | 0.87 | 1.99 | 2.97 | 0.56 | 2.71 | 3.70 |
| 2.19 | 6.2 | 9.7  | 0.95 | 1.74 | 2.81 | 1.34 | 1.53 | 2.71 |
| 2.24 | 6.5 | 9.4  | 0.91 | 2.06 | 2.18 | 1.00 | 3.04 | 1.94 |
| 2.45 | 6.5 | 9.3  | 0.91 | 1.82 | 3.15 | 0.62 | 2.14 | 2.53 |
| 1.94 | 6.5 | 10.3 | 0.98 | 2.10 | 2.58 | 1.20 | 1.84 | 3.75 |
| 1.74 | 6.8 | 10.4 | 1.11 | 1.82 | 3.09 | 0.90 | 2.19 | 5.25 |
| 3.16 | 6.7 | 10.1 | 1.07 | 1.96 | 2.89 | 0.73 | 1.67 | 1.78 |
| 3.16 | 6.8 | 10.5 | 0.95 | 1.99 | 2.81 | 1.02 | 2.87 | 1.50 |
| 3.08 | 6.5 | 10.4 | 0.83 | 1.94 | 2.81 | 0.70 | 4.73 | 2.53 |
| 3.04 | 6.5 | 9.9  | 0.90 | 1.82 | 2.89 | 0.61 | 3.21 | 3.02 |

|      |     |      |      |      |      |      |      |      |
|------|-----|------|------|------|------|------|------|------|
| 3.04 | 6.7 | 10.2 | 0.90 | 1.82 | 2.89 | 0.58 | 2.74 | 2.81 |
| 2.96 | 6.5 | 10.0 | 1.07 | 1.70 | 2.81 | 1.13 | 1.48 | 4.11 |
| 3.06 | 5.1 | 10.3 | 0.79 | 1.94 | 2.46 | 1.31 | 1.46 | 4.39 |
| 3.01 | 6.2 | 9.9  | 1.02 | 1.82 | 2.66 | 1.10 | 2.23 | 2.39 |
| 3.10 | 6.1 | 10.4 | 1.07 | 2.07 | 2.67 | 1.06 | 2.92 | 1.71 |
| 2.71 | 6.8 | 10.3 | 0.99 | 1.56 | 2.89 | 1.13 | 2.82 | 4.11 |
| 2.81 | 6.8 | 9.7  | 1.06 | 1.76 | 2.53 | 1.09 | 2.12 | 3.39 |
| 3.09 | 6.3 | 10.3 | 1.07 | 2.00 | 2.97 | 0.83 | 2.45 | 3.08 |
| 3.02 | 6.5 | 10.4 | 1.07 | 1.88 | 2.89 | 1.35 | 2.83 | 6.29 |
| 2.96 | 6.5 | 7.1  | 1.02 | 1.96 | 2.41 | 0.83 | 2.16 | 1.95 |
| 3.21 | 6.3 | 9.6  | 1.18 | 1.99 | 2.53 | 0.84 | 5.47 | 3.80 |
| 3.01 | 3.7 | 10.3 | 1.19 | 1.70 | 2.97 | 1.02 | 3.76 | 3.39 |
| 3.11 | 6.0 | 10.1 | 0.87 | 1.80 | 2.78 | 1.07 | 2.12 | 3.21 |
| 2.96 | 3.5 | 9.4  | 1.06 | 1.74 | 2.73 | 1.34 | 2.71 | 4.47 |
| 3.21 | 6.2 | 9.9  | 1.10 | 1.88 | 2.76 | 1.07 | 1.44 | 4.17 |
| 2.49 | 6.5 | 10.0 | 0.99 | 1.82 | 3.01 | 1.41 | 2.49 | 2.70 |
| 2.99 | 6.4 | 10.0 | 0.99 | 1.80 | 2.89 | 1.02 | 3.66 | 3.32 |
| 2.71 | 1.7 | 10.3 | 0.90 | 1.90 | 2.33 | 0.97 | 2.45 | 5.61 |
| 3.12 | 2.0 | 10.2 | 1.15 | 1.82 | 2.61 | 1.45 | 2.37 | 3.48 |
| 3.08 | 6.9 | 9.5  | 0.91 | 1.71 | 2.38 | 1.53 | 1.94 | 3.41 |
| 2.61 | 6.9 | 9.4  | 0.71 | 1.53 | 2.26 | 0.89 | 5.83 | 9.54 |
| 2.74 | 6.6 | 9.5  | 0.79 | 1.78 | 2.68 | 1.01 | 2.31 | 4.68 |
| 2.94 | 6.9 | 9.4  | 0.87 | 1.47 | 2.73 | 0.72 | 6.60 | 2.19 |
| 2.76 | 6.5 | 7.6  | 1.30 | 2.02 | 2.93 | 1.62 | 0.62 | 2.81 |
| 3.04 | 6.4 | 10.4 | 1.28 | 1.70 | 2.93 | 0.92 | 2.00 | 3.58 |
| 2.97 | 6.7 | 10.5 | 1.23 | 1.20 | 2.82 | 1.20 | 1.43 | 3.72 |
| 3.06 | 6.5 | 9.0  | 1.20 | 1.48 | 3.11 | 0.92 | 1.85 | 3.18 |
| 2.74 | 6.6 | 7.2  | 1.11 | 2.06 | 2.81 | 0.83 | 3.86 | 2.23 |
| 3.14 | 6.9 | 2.5  | 1.08 | 1.98 | 2.89 | 1.13 | 5.00 | 4.48 |
| 2.63 | 6.6 | 7.8  | 0.95 | 1.86 | 2.66 | 0.97 | 2.94 | 3.46 |
| 2.85 | 6.6 | 10.2 | 0.95 | 2.10 | 1.50 | 1.57 | 2.86 | 4.03 |
| 2.71 | 6.8 | 10.2 | 1.15 | 1.86 | 1.48 | 0.99 | 2.27 | 6.09 |
| 2.51 | 6.8 | 10.3 | 1.15 | 2.13 | 2.26 | 1.14 | 2.28 | 3.80 |
| 2.84 | 6.5 | 9.9  | 1.42 | 1.98 | 1.71 | 1.34 | 4.71 | 2.78 |
| 2.04 | 6.8 | 10.2 | 1.07 | 1.70 | 1.27 | 0.78 | 4.60 | 2.91 |

|      |     |      |      |      |      |      |      |      |
|------|-----|------|------|------|------|------|------|------|
| 3.10 | 6.4 | 10.2 | 0.96 | 1.82 | 1.20 | 0.99 | 1.23 | 3.01 |
| 2.96 | 6.5 | 8.7  | 1.16 | 1.86 | 2.69 | 1.18 | 2.66 | 2.25 |
| 2.89 | 6.7 | 10.3 | 1.11 | 1.98 | 2.69 | 1.11 | 2.91 | 2.65 |
| 3.11 | 6.5 | 10.3 | 1.11 | 1.94 | 2.53 | 0.95 | 2.15 | 3.25 |
| 3.12 | 6.5 | 10.2 | 1.15 | 1.94 | 2.76 | 0.97 | 1.85 | 3.38 |
| 2.80 | 6.3 | 10.0 | 1.03 | 1.82 | 2.61 | 0.72 | 3.11 | 2.57 |
| 3.00 | 6.7 | 10.6 | 1.15 | 1.98 | 2.80 | 1.05 | 1.74 | 2.95 |
| 2.78 | 6.0 | 10.1 | 0.96 | 1.93 | 2.53 | 0.73 | 1.62 | 2.86 |
| 2.97 | 5.2 | 10.4 | 0.96 | 1.94 | 2.13 | 0.57 | 2.06 | 2.39 |
| 3.06 | 5.1 | 9.8  | 1.50 | 1.78 | 2.72 | 0.65 | 3.05 | 2.93 |
| 3.06 | 4.9 | 10.3 | 1.11 | 1.98 | 2.61 | 1.58 | 2.67 | 2.67 |
| 3.13 | 5.8 | 6.7  | 0.96 | 2.26 | 2.65 | 0.72 | 3.83 | 3.02 |
| 2.94 | 6.2 | 10.3 | 1.08 | 1.98 | 2.53 | 0.73 | 2.92 | 4.46 |
| 3.08 | 5.9 | 10.0 | 0.99 | 1.98 | 2.77 | 0.88 | 3.84 | 3.43 |
| 2.96 | 6.8 | 8.6  | 0.99 | 1.90 | 2.72 | 0.95 | 1.59 | 6.92 |
| 3.14 | 6.7 | 10.4 | 1.07 | 1.82 | 2.53 | 0.80 | 1.37 | 3.59 |
| 3.04 | 6.6 | 10.1 | 1.03 | 1.81 | 2.89 | 0.56 | 4.78 | 3.07 |
| 2.87 | 6.7 | 5.8  | 1.20 | 1.54 | 2.79 | 1.38 | 2.60 | 4.70 |
| 3.02 | 6.2 | 7.1  | 0.99 | 1.81 | 2.61 | 3.42 | 2.89 | 2.81 |
| 3.06 | 6.8 | 6.0  | 0.99 | 1.81 | 2.57 | 1.56 | 1.46 | 3.68 |
| 2.77 | 6.9 | 9.1  | 1.02 | 1.70 | 2.49 | 0.82 | 1.28 | 6.37 |
| 2.78 | 2.7 | 10.5 | 1.03 | 1.98 | 2.53 | 1.03 | 1.85 | 4.12 |
| 3.06 | 3.9 | 9.9  | 0.96 | 1.93 | 2.69 | 0.87 | 1.90 | 3.55 |
| 3.01 | 6.7 | 10.3 | 0.71 | 1.94 | 2.75 | 1.19 | 3.41 | 4.02 |
| 3.21 | 6.3 | 10.0 | 0.79 | 1.90 | 2.53 | 1.06 | 1.64 | 4.32 |
| 2.88 | 6.6 | 5.2  | 1.11 | 1.61 | 2.56 | 0.56 | 3.38 | 7.95 |
| 3.12 | 6.1 | 9.7  | 1.23 | 1.90 | 2.72 | 1.05 | 2.62 | 1.34 |
| 3.01 | 5.9 | 5.7  | 1.03 | 1.82 | 2.18 | 1.35 | 2.20 | 6.39 |
| 3.11 | 6.7 | 10.3 | 0.99 | 1.38 | 2.65 | 1.85 | 2.95 | 3.41 |
| 3.10 | 6.9 | 9.4  | 0.87 | 1.89 | 2.29 | 1.28 | 1.23 | 3.60 |
| 2.93 | 6.7 | 9.8  | 1.22 | 1.70 | 2.68 | 1.22 | 3.48 | 2.78 |
| 3.04 | 6.7 | 10.0 | 0.87 | 1.73 | 1.97 | 0.68 | 1.78 | 3.30 |
| 2.98 | 6.7 | 9.2  | 0.96 | 1.94 | 3.76 | 0.97 | 2.83 | 6.22 |
| 3.11 | 6.4 | 9.9  | 0.99 | 1.78 | 2.41 | 2.11 | 3.17 | 7.05 |
| 3.09 | 6.0 | 10.1 | 1.07 | 1.86 | 2.57 | 1.17 | 1.47 | 1.94 |

|      |     |      |      |      |      |      |      |      |
|------|-----|------|------|------|------|------|------|------|
| 3.11 | 6.6 | 10.1 | 1.18 | 1.86 | 2.46 | 0.78 | 1.22 | 2.68 |
| 3.01 | 6.7 | 9.9  | 1.22 | 1.94 | 2.33 | 1.23 | 4.46 | 3.74 |
| 2.96 | 6.6 | 10.4 | 1.18 | 1.82 | 2.13 | 0.97 | 2.39 | 2.81 |
| 2.73 | 6.8 | 9.8  | 1.11 | 2.57 | 2.33 | 0.68 | 1.89 | 2.62 |
| 3.00 | 6.6 | 9.6  | 1.15 | 1.62 | 2.57 | 1.35 | 1.26 | 3.80 |
| 2.99 | 6.6 | 9.9  | 0.99 | 1.47 | 2.61 | 1.62 | 1.62 | 2.22 |
| 2.95 | 6.4 | 9.6  | 1.10 | 1.70 | 2.96 | 1.09 | 1.44 | 1.93 |
| 2.92 | 6.8 | 8.2  | 1.03 | 1.94 | 2.33 | 0.45 | 3.76 | 2.72 |
| 2.71 | 6.6 | 10.3 | 1.27 | 1.65 | 2.56 | 1.11 | 3.26 | 2.13 |
| 3.14 | 6.4 | 10.1 | 1.10 | 1.82 | 2.56 | 0.70 | 2.39 | 2.33 |
| 3.17 | 6.5 | 10.2 | 1.11 | 1.70 | 2.52 | 1.10 | 1.45 | 3.01 |
| 2.99 | 6.4 | 10.2 | 1.31 | 1.86 | 2.46 | 1.23 | 2.67 | 4.58 |
| 3.06 | 6.6 | 10.3 | 1.23 | 2.06 | 2.46 | 3.06 | 2.69 | 3.92 |
| 2.96 | 6.4 | 10.3 | 1.11 | 1.86 | 2.69 | 1.50 | 2.31 | 4.83 |
| 3.10 | 6.5 | 10.2 | 1.11 | 1.89 | 2.41 | 1.57 | 2.79 | 1.78 |
| 3.14 | 6.4 | 10.0 | 0.96 | 1.82 | 2.61 | 1.27 | 2.80 | 2.19 |
| 2.93 | 6.5 | 9.8  | 0.96 | 1.78 | 2.33 | 1.48 | 2.48 | 2.76 |
| 3.08 | 6.5 | 10.4 | 0.99 | 1.90 | 2.85 | 1.06 | 2.61 | 4.01 |
| 3.11 | 6.7 | 10.3 | 1.22 | 1.89 | 2.85 | 1.23 | 2.71 | 5.84 |
| 2.85 | 6.5 | 10.1 | 1.11 | 1.69 | 2.77 | 1.83 | 3.21 | 3.53 |
| 2.78 | 6.5 | 10.4 | 1.02 | 1.74 | 2.69 | 0.88 | 2.00 | 3.63 |
| 2.93 | 6.6 | 10.1 | 1.10 | 1.54 | 2.65 | 1.32 | 3.50 | 3.86 |
| 2.86 | 6.5 | 9.6  | 1.02 | 1.42 | 2.13 | 0.83 | 2.55 | 4.64 |
| 2.96 | 4.5 | 10.1 | 1.11 | 1.62 | 2.53 | 3.06 | 2.86 | 1.64 |
| 2.30 | 5.7 | 10.0 | 1.03 | 1.50 | 2.49 | 2.56 | 2.31 | 4.06 |
| 3.10 | 5.2 | 10.1 | 0.95 | 1.49 | 2.37 | 1.52 | 1.46 | 2.04 |
| 2.93 | 6.1 | 10.0 | 1.02 | 1.27 | 2.85 | 0.73 | 2.68 | 2.20 |
| 2.94 | 6.5 | 10.2 | 0.71 | 1.34 | 2.65 | 0.68 | 2.48 | 3.58 |
| 3.01 | 6.4 | 10.1 | 1.11 | 0.91 | 1.94 | 0.57 | 2.86 | 3.58 |
| 3.01 | 4.4 | 9.2  | 1.10 | 1.94 | 2.29 | 0.67 | 3.17 | 2.60 |
| 2.90 | 6.8 | 10.5 | 1.07 | 2.07 | 2.01 | 1.15 | 4.23 | 2.50 |
| 2.76 | 6.1 | 10.1 | 0.95 | 1.74 | 2.21 | 0.78 | 2.56 | 4.10 |
| 2.97 | 6.5 | 9.1  | 0.96 | 2.06 | 1.70 | 0.89 | 2.78 | 2.24 |
| 3.06 | 6.5 | 6.2  | 0.91 | 2.10 | 1.86 | 1.17 | 1.23 | 2.22 |
| 3.01 | 6.1 | 10.6 | 0.95 | 1.89 | 2.04 | 0.79 | 2.29 | 4.05 |

|      |     |      |      |      |      |      |      |      |
|------|-----|------|------|------|------|------|------|------|
| 2.85 | 6.3 | 9.6  | 1.10 | 2.01 | 2.06 | 1.28 | 4.15 | 1.11 |
| 2.91 | 6.4 | 10.0 | 1.11 | 1.91 | 2.60 | 1.77 | 2.86 | 1.68 |
| 2.85 | 3.9 | 10.0 | 0.99 | 1.78 | 1.86 | 1.18 | 2.22 | 0.61 |
| 3.06 | 6.5 | 9.9  | 0.95 | 1.86 | 1.93 | 0.45 | 1.89 | 2.99 |
| 2.96 | 6.6 | 9.8  | 1.03 | 2.02 | 1.30 | 0.73 | 1.47 | 4.95 |
| 2.96 | 6.6 | 10.2 | 1.19 | 1.78 | 1.62 | 0.78 | 3.06 | 4.15 |
| 3.12 | 6.5 | 10.0 | 0.95 | 1.86 | 1.90 | 1.50 | 2.09 | 3.55 |
| 2.96 | 6.5 | 8.3  | 0.95 | 2.01 | 1.62 | 1.32 | 3.34 | 2.18 |
| 2.97 | 6.5 | 9.9  | 0.83 | 2.59 | 3.09 | 0.78 | 2.01 | 3.57 |
| 3.00 | 4.9 | 9.7  | 0.96 | 2.07 | 2.79 | 0.73 | 2.51 | 3.32 |
| 2.84 | 6.6 | 10.4 | 1.03 | 1.76 | 2.73 | 0.83 | 2.16 | 2.90 |
| 2.62 | 6.8 | 10.4 | 0.99 | 1.74 | 3.15 | 1.40 | 4.16 | 3.53 |
| 2.91 | 6.6 | 10.6 | 1.11 | 1.43 | 3.08 | 1.13 | 2.39 | 3.66 |
| 3.12 | 6.5 | 10.2 | 0.99 | 2.11 | 3.02 | 0.91 | 1.91 | 3.42 |
| 2.81 | 6.6 | 10.1 | 0.87 | 2.06 | 2.89 | 0.95 | 2.22 | 3.78 |
| 2.89 | 6.4 | 8.0  | 1.11 | 2.31 | 2.95 | 1.70 | 3.12 | 3.54 |
| 3.14 | 6.6 | 10.2 | 1.15 | 1.94 | 2.85 | 0.67 | 3.50 | 4.56 |
| 3.04 | 6.4 | 2.1  | 1.15 | 1.91 | 2.85 | 0.45 | 3.87 | 2.56 |
| 2.85 | 6.6 | 2.0  | 1.11 | 1.86 | 2.78 | 2.35 | 1.83 | 5.90 |
| 2.69 | 5.8 | 9.2  | 1.03 | 1.78 | 2.69 | 0.69 | 3.00 | 3.34 |
| 2.95 | 6.5 | 10.1 | 1.11 | 1.63 | 2.73 | 0.83 | 2.23 | 4.08 |
| 3.06 | 6.0 | 10.1 | 1.15 | 1.94 | 3.07 | 0.95 | 3.84 | 3.07 |
| 3.20 | 6.0 | 10.2 | 0.99 | 2.11 | 3.13 | 0.95 | 2.52 | 3.18 |
| 2.72 | 6.6 | 10.4 | 0.83 | 2.06 | 2.85 | 0.94 | 5.10 | 2.23 |
| 3.06 | 6.7 | 10.3 | 0.83 | 1.99 | 2.26 | 1.18 | 0.95 | 3.53 |
| 2.92 | 6.6 | 9.7  | 1.15 | 1.94 | 3.19 | 0.85 | 3.32 | 2.99 |
| 2.01 | 6.6 | 10.1 | 0.91 | 1.91 | 2.79 | 1.49 | 2.50 | 5.01 |
| 2.96 | 6.6 | 10.5 | 0.95 | 2.23 | 2.79 | 1.23 | 0.61 | 3.22 |
| 2.92 | 6.3 | 10.5 | 1.02 | 2.06 | 2.89 | 0.95 | 4.22 | 6.63 |
| 2.93 | 6.8 | 10.0 | 1.19 | 1.70 | 2.86 | 0.89 | 4.68 | 5.81 |
| 2.91 | 6.1 | 10.3 | 0.99 | 1.81 | 2.78 | 2.05 | 2.56 | 3.93 |
| 3.06 | 6.5 | 10.2 | 1.31 | 1.62 | 2.80 | 1.98 | 2.79 | 3.99 |
| 2.83 | 6.1 | 9.3  | 0.91 | 1.79 | 3.27 | 0.78 | 2.33 | 5.36 |
| 2.53 | 6.6 | 10.0 | 0.91 | 2.11 | 2.69 | 1.35 | 2.15 | 1.79 |
| 3.08 | 6.4 | 6.5  | 1.19 | 1.81 | 2.85 | 1.06 | 3.51 | 3.29 |

|      |     |      |      |      |      |      |      |      |
|------|-----|------|------|------|------|------|------|------|
| 2.98 | 6.6 | 10.3 | 1.11 | 1.74 | 3.07 | 1.09 | 1.95 | 3.52 |
| 2.97 | 6.3 | 9.4  | 1.11 | 1.79 | 2.89 | 0.56 | 3.73 | 5.31 |
| 2.85 | 6.6 | 10.2 | 0.83 | 1.82 | 2.72 | 0.61 | 2.21 | 3.06 |
| 3.01 | 5.6 | 10.4 | 0.96 | 1.82 | 2.85 | 1.14 | 2.56 | 3.94 |
| 2.93 | 6.5 | 8.7  | 1.19 | 1.78 | 2.82 | 0.76 | 2.47 | 1.97 |
| 2.86 | 6.5 | 10.1 | 1.10 | 1.83 | 2.80 | 0.58 | 5.80 | 2.93 |
| 3.08 | 6.9 | 8.7  | 1.27 | 1.70 | 2.65 | 1.23 | 3.71 | 3.95 |
| 2.93 | 6.4 | 10.5 | 1.18 | 1.58 | 3.07 | 1.04 | 3.03 | 4.06 |
| 2.86 | 6.5 | 10.2 | 0.91 | 1.86 | 2.92 | 0.95 | 6.06 | 2.67 |
| 2.89 | 6.2 | 7.5  | 1.15 | 1.66 | 2.96 | 1.25 | 2.60 | 1.37 |
| 2.83 | 4.4 | 10.4 | 1.07 | 1.76 | 2.72 | 0.95 | 2.19 | 2.18 |
| 2.92 | 5.1 | 10.4 | 1.03 | 1.68 | 3.00 | 1.15 | 3.69 | 4.96 |
| 2.71 | 4.0 | 10.1 | 1.07 | 1.34 | 2.67 | 0.90 | 1.02 | 4.46 |
| 2.89 | 3.9 | 10.3 | 1.27 | 0.80 | 2.92 | 0.48 | 3.08 | 3.44 |
| 2.83 | 4.8 | 10.3 | 1.10 | 0.48 | 2.65 | 1.09 | 2.34 | 3.29 |
| 2.83 | 2.2 | 10.3 | 1.02 | 2.10 | 3.81 | 1.29 | 1.81 | 4.89 |
| 2.92 | 3.0 | 10.2 | 0.99 | 1.90 | 2.29 | 0.67 | 2.52 | 5.87 |
| 2.94 | 2.8 | 10.0 | 1.10 | 1.89 | 1.36 | 1.30 | 4.67 | 2.88 |
| 2.99 | 6.6 | 10.5 | 1.27 | 1.51 | 2.80 | 0.67 | 1.45 | 4.24 |
| 2.91 | 6.5 | 10.1 | 0.90 | 1.86 | 1.78 | 0.96 | 2.67 | 2.90 |
| 2.99 | 6.6 | 10.0 | 0.90 | 1.79 | 2.92 | 1.06 | 3.28 | 3.18 |
| 2.68 | 6.6 | 9.7  | 1.07 | 1.66 | 2.80 | 0.67 | 2.29 | 3.02 |
| 2.81 | 6.6 | 9.6  | 1.07 | 1.79 | 3.09 | 1.50 | 2.68 | 3.45 |
| 2.99 | 6.7 | 10.5 | 1.02 | 1.87 | 2.50 | 1.16 | 2.09 | 2.95 |
| 2.99 | 6.7 | 9.8  | 1.03 | 1.85 | 2.57 | 1.00 | 1.02 | 3.66 |
| 2.46 | 6.6 | 10.2 | 1.10 | 1.67 | 2.67 | 1.06 | 3.23 | 4.96 |
| 3.24 | 6.7 | 10.1 | 0.87 | 1.93 | 2.29 | 0.78 | 2.89 | 5.23 |
| 2.71 | 6.6 | 10.5 | 1.06 | 2.02 | 1.71 | 0.93 | 1.76 | 3.85 |
| 2.61 | 6.6 | 10.2 | 1.02 | 2.01 | 1.58 | 1.00 | 2.71 | 3.73 |
| 2.57 | 6.7 | 10.4 | 1.06 | 1.89 | 2.54 | 1.06 | 2.96 | 2.87 |
| 2.71 | 6.8 | 10.1 | 0.90 | 1.67 | 2.34 | 1.04 | 3.18 | 2.59 |
| 2.86 | 6.5 | 8.4  | 0.71 | 1.82 | 1.89 | 0.95 | 3.29 | 4.42 |
| 2.61 | 6.1 | 10.5 | 0.87 | 1.94 | 3.20 | 0.45 | 2.96 | 2.45 |
| 2.41 | 6.2 | 10.2 | 1.03 | 1.62 | 3.06 | 0.83 | 4.72 | 4.59 |
| 2.88 | 6.7 | 9.6  | 0.83 | 1.74 | 3.18 | 0.80 | 1.42 | 3.06 |

|      |     |      |      |      |      |      |      |      |
|------|-----|------|------|------|------|------|------|------|
| 2.34 | 5.7 | 10.1 | 1.18 | 1.78 | 2.82 | 0.99 | 0.79 | 3.20 |
| 3.11 | 6.5 | 10.4 | 1.02 | 1.99 | 2.89 | 0.96 | 1.32 | 3.16 |
| 3.04 | 6.6 | 10.3 | 0.83 | 1.67 | 2.93 | 1.73 | 1.40 | 6.23 |
| 2.60 | 6.1 | 9.7  | 0.96 | 1.81 | 3.10 | 1.07 | 4.21 | 5.22 |
| 2.71 | 6.3 | 10.3 | 0.87 | 1.82 | 3.06 | 0.45 | 2.57 | 4.25 |
| 2.95 | 6.7 | 8.5  | 0.95 | 2.02 | 2.80 | 0.97 | 1.80 | 6.63 |
| 2.72 | 6.6 | 10.3 | 0.83 | 1.82 | 2.86 | 1.14 | 1.55 | 3.27 |
| 3.06 | 6.9 | 10.0 | 1.03 | 1.74 | 2.80 | 1.09 | 3.07 | 2.65 |
| 3.06 | 7.0 | 9.3  | 0.91 | 1.67 | 3.00 | 0.87 | 3.02 | 3.56 |
| 2.99 | 6.4 | 10.5 | 0.96 | 1.71 | 2.92 | 1.19 | 2.41 | 1.29 |
| 3.06 | 6.5 | 10.1 | 1.11 | 1.59 | 3.05 | 0.72 | 2.13 | 1.77 |
| 3.01 | 6.3 | 10.2 | 0.87 | 1.78 | 2.93 | 1.07 | 2.24 | 2.85 |
| 3.12 | 6.7 | 10.3 | 0.96 | 1.89 | 2.96 | 0.48 | 4.60 | 3.70 |
| 3.12 | 6.8 | 10.5 | 0.91 | 1.71 | 2.92 | 1.06 | 2.28 | 1.93 |
| 2.99 | 6.6 | 10.1 | 0.71 | 1.79 | 2.98 | 0.92 | 3.63 | 2.72 |
| 3.21 | 6.5 | 10.5 | 1.06 | 1.90 | 2.89 | 0.56 | 3.61 | 1.90 |
| 2.98 | 6.3 | 10.3 | 1.03 | 1.87 | 2.96 | 0.88 | 2.30 | 4.50 |
| 2.78 | 6.4 | 10.5 | 1.07 | 1.87 | 2.80 | 1.05 | 1.56 | 4.17 |
| 3.06 | 6.3 | 10.2 | 0.96 | 2.02 | 2.95 | 1.00 | 2.82 | 3.56 |
| 3.26 | 6.4 | 10.3 | 1.19 | 1.99 | 2.76 | 1.07 | 3.38 | 2.53 |
| 3.06 | 6.7 | 9.8  | 0.99 | 1.71 | 2.98 | 1.02 | 2.39 | 4.00 |
| 3.26 | 6.9 | 9.4  | 0.91 | 2.05 | 2.84 | 1.79 | 1.56 | 2.14 |
| 2.98 | 6.5 | 10.6 | 0.96 | 2.01 | 2.82 | 0.57 | 1.93 | 3.44 |
| 3.01 | 5.7 | 10.5 | 0.98 | 1.90 | 2.89 | 1.77 | 3.06 | 5.80 |
| 2.95 | 2.2 | 10.4 | 1.02 | 1.81 | 2.56 | 0.77 | 1.52 | 3.59 |
| 3.01 | 6.8 | 10.3 | 1.10 | 1.71 | 2.84 | 1.39 | 1.65 | 1.64 |
| 2.66 | 6.6 | 8.4  | 1.07 | 1.74 | 2.84 | 0.50 | 2.87 | 4.36 |
| 3.16 | 6.6 | 10.1 | 1.22 | 1.69 | 2.89 | 1.85 | 2.00 | 6.17 |
| 3.06 | 5.8 | 10.2 | 1.02 | 1.67 | 2.93 | 1.12 | 1.58 | 4.16 |
| 3.08 | 6.3 | 7.7  | 1.13 | 1.87 | 3.08 | 0.78 | 1.27 | 4.39 |
| 2.97 | 6.8 | 10.6 | 1.05 | 1.94 | 2.80 | 1.13 | 2.86 | 2.86 |
| 2.76 | 6.6 | 9.7  | 1.11 | 1.69 | 2.80 | 0.61 | 4.19 | 6.44 |
| 3.08 | 6.6 | 9.9  | 1.20 | 1.62 | 1.97 | 0.73 | 1.63 | 2.93 |
| 2.39 | 6.5 | 9.3  | 1.11 | 1.97 | 2.90 | 0.87 | 1.44 | 1.89 |
| 2.57 | 6.3 | 9.5  | 1.16 | 2.02 | 2.70 | 0.95 | 2.20 | 4.13 |

|      |     |      |      |      |      |      |      |      |
|------|-----|------|------|------|------|------|------|------|
| 2.85 | 6.6 | 10.2 | 0.76 | 1.94 | 2.92 | 1.40 | 2.04 | 1.96 |
| 2.92 | 6.5 | 10.0 | 0.99 | 1.34 | 2.89 | 0.55 | 1.98 | 4.93 |
| 3.10 | 6.4 | 9.9  | 0.96 | 1.39 | 2.92 | 0.61 | 3.13 | 3.30 |
| 3.18 | 6.3 | 9.9  | 1.39 | 1.94 | 2.82 | 1.11 | 3.00 | 2.52 |
| 2.87 | 6.7 | 9.7  | 0.97 | 2.10 | 2.76 | 0.91 | 1.07 | 2.34 |
| 2.99 | 6.6 | 9.7  | 0.96 | 1.94 | 2.68 | 0.53 | 1.69 | 3.80 |
| 3.10 | 6.0 | 9.6  | 0.99 | 1.97 | 2.49 | 0.73 | 1.43 | 3.99 |
| 2.71 | 6.3 | 10.1 | 1.08 | 2.07 | 2.72 | 0.87 | 1.53 | 3.39 |
| 2.85 | 6.2 | 9.4  | 1.16 | 1.90 | 2.56 | 1.00 | 5.01 | 2.95 |
| 2.85 | 6.6 | 10.0 | 1.11 | 1.79 | 3.13 | 0.90 | 3.09 | 3.12 |
| 3.26 | 6.6 | 8.9  | 1.11 | 1.30 | 3.21 | 2.52 | 2.67 | 5.38 |
| 2.81 | 6.2 | 9.5  | 0.99 | 1.47 | 2.84 | 1.45 | 1.56 | 2.77 |
| 3.24 | 6.5 | 10.3 | 0.96 | 1.51 | 2.80 | 0.72 | 1.92 | 5.12 |
| 2.44 | 6.1 | 9.7  | 0.91 | 1.69 | 2.54 | 0.72 | 0.90 | 4.47 |
| 2.29 | 6.8 | 8.9  | 1.05 | 1.10 | 2.53 | 0.84 | 1.54 | 3.34 |
| 2.14 | 6.6 | 10.1 | 0.83 | 1.74 | 2.58 | 0.69 | 1.12 | 2.59 |
| 2.44 | 6.6 | 9.8  | 0.92 | 2.02 | 2.73 | 1.16 | 2.57 | 4.30 |
| 2.88 | 6.6 | 10.1 | 1.08 | 1.74 | 2.89 | 0.78 | 2.50 | 4.46 |
| 3.36 | 6.2 | 10.0 | 0.91 | 1.78 | 2.29 | 1.24 | 2.76 | 2.56 |
| 1.50 | 6.7 | 9.6  | 0.96 | 1.89 | 1.62 | 1.11 | 1.52 | 1.82 |
| 3.31 | 6.6 | 10.0 | 0.91 | 1.89 | 2.80 | 0.95 | 2.96 | 3.78 |
| 3.06 | 6.6 | 9.2  | 1.03 | 1.74 | 2.49 | 1.18 | 1.94 | 0.99 |
| 3.26 | 5.7 | 9.5  | 0.96 | 1.74 | 2.80 | 1.11 | 3.32 | 2.20 |
| 3.24 | 6.6 | 10.0 | 1.16 | 2.01 | 1.51 | 1.17 | 2.86 | 2.10 |
| 3.04 | 6.6 | 9.8  | 1.11 | 1.77 | 2.96 | 1.59 | 2.67 | 1.71 |
| 3.11 | 6.5 | 10.1 | 1.03 | 1.82 | 3.03 | 1.72 | 3.06 | 4.47 |
| 2.36 | 6.8 | 8.2  | 0.99 | 2.02 | 1.54 | 0.87 | 2.84 | 4.22 |
| 3.17 | 6.5 | 7.6  | 1.03 | 1.69 | 1.47 | 0.92 | 2.94 | 2.17 |
| 3.26 | 6.3 | 10.3 | 0.88 | 1.78 | 1.71 | 0.89 | 3.32 | 1.71 |
| 3.17 | 6.4 | 10.2 | 1.03 | 1.94 | 2.86 | 1.23 | 1.71 | 2.12 |
| 3.06 | 6.5 | 10.2 | 1.11 | 1.98 | 2.07 | 2.27 | 2.59 | 2.34 |
| 2.80 | 4.8 | 10.0 | 1.13 | 1.94 | 2.69 | 3.27 | 3.06 | 2.51 |
| 3.31 | 2.9 | 9.8  | 1.08 | 1.46 | 2.34 | 0.80 | 1.82 | 7.99 |
| 3.16 | 4.3 | 9.2  | 0.83 | 1.90 | 2.52 | 1.05 | 3.37 | 2.09 |
| 2.97 | 1.7 |      | 1.11 | 2.07 | 2.84 | 0.67 | 1.64 | 2.75 |

|      |     |      |      |      |      |      |      |
|------|-----|------|------|------|------|------|------|
| 3.11 | 6.7 | 0.96 | 1.74 | 2.57 | 0.92 | 2.66 | 1.80 |
| 3.08 | 6.6 | 1.11 | 2.10 | 2.45 | 0.88 | 2.19 | 4.29 |
| 3.19 | 6.4 | 1.03 | 2.02 | 2.42 | 1.02 | 1.94 | 2.36 |
| 3.01 | 6.4 | 0.96 | 1.69 | 2.58 | 0.73 | 1.34 | 2.86 |
| 3.13 | 6.7 | 0.96 | 1.85 | 2.85 | 1.09 | 4.62 | 3.74 |
| 3.06 | 6.5 | 0.97 | 1.78 | 2.68 | 1.07 | 4.35 | 1.66 |
| 3.26 | 6.5 | 0.76 | 1.57 | 2.70 | 2.00 | 3.36 | 5.84 |
| 3.17 | 6.3 | 1.23 | 1.94 | 2.80 | 0.56 | 2.78 | 3.76 |
| 3.18 | 4.6 | 1.08 | 1.82 | 2.30 | 0.91 | 2.86 | 3.60 |
| 3.13 | 6.8 | 1.03 | 1.94 | 2.17 | 0.80 | 1.27 | 2.56 |
| 2.96 | 6.8 | 1.03 | 1.90 | 2.89 | 0.51 | 2.91 | 4.17 |
| 3.23 | 6.6 | 0.96 | 1.81 | 2.68 | 1.17 | 3.17 | 1.34 |
| 3.02 | 6.6 | 1.08 | 2.14 | 2.38 | 0.48 | 1.27 | 2.43 |
| 3.06 | 6.6 | 0.83 | 1.97 | 2.49 | 0.50 | 1.84 | 3.37 |
| 3.26 | 6.7 | 1.11 | 1.97 | 2.64 | 0.62 | 2.41 | 0.90 |
| 2.83 | 6.3 | 0.96 | 1.79 | 2.86 | 0.84 | 1.74 | 0.70 |
| 3.29 | 6.7 | 0.97 | 1.93 | 2.66 | 0.87 | 3.37 | 0.83 |
| 2.63 | 6.6 | 1.11 | 2.10 | 2.77 | 0.78 | 5.00 | 0.68 |
| 3.25 | 6.7 | 1.16 | 2.05 | 2.68 | 1.10 | 2.16 | 3.67 |
| 3.25 | 6.3 | 0.99 | 1.82 | 2.98 | 1.20 | 5.27 | 2.09 |
| 3.22 | 6.6 | 1.16 | 2.02 | 2.78 | 0.75 | 1.95 | 3.16 |
| 3.21 | 6.6 | 1.19 | 1.77 | 2.56 | 1.17 | 3.08 | 2.41 |
| 3.31 | 4.7 | 0.96 | 1.69 | 2.87 | 0.62 | 5.19 | 4.12 |
| 3.01 | 6.5 | 0.99 | 1.89 | 2.64 | 0.95 | 3.21 | 3.60 |
| 2.83 | 6.7 | 1.07 | 1.69 | 2.78 | 0.50 | 4.07 | 3.62 |
| 3.30 | 6.9 | 1.03 | 1.98 | 2.75 | 0.67 | 1.99 | 3.95 |
| 3.32 | 5.9 | 0.92 | 2.05 | 2.56 | 0.95 | 3.21 | 3.68 |
| 2.99 | 6.2 | 1.27 | 2.05 | 2.65 | 0.83 | 1.68 | 3.76 |
| 3.23 | 6.7 | 0.99 | 2.10 | 2.10 | 1.00 | 2.84 | 5.03 |
| 3.01 | 6.7 | 1.11 | 2.13 | 2.53 | 1.13 | 1.80 | 2.11 |
| 2.97 | 6.7 | 0.87 | 1.87 | 2.34 | 2.11 | 2.14 | 3.24 |
| 3.06 | 6.9 | 0.56 | 1.94 | 2.86 | 0.61 | 3.06 | 3.27 |
| 2.29 | 6.7 | 0.91 | 1.94 | 2.84 | 0.61 | 1.43 | 2.22 |
| 2.04 | 6.7 | 1.11 | 1.87 | 2.93 | 0.72 | 7.05 | 3.70 |
| 1.79 | 6.5 | 1.08 | 2.06 | 2.66 | 0.95 | 3.02 | 2.50 |

|      |     |      |      |      |      |      |      |
|------|-----|------|------|------|------|------|------|
| 2.20 | 6.6 | 0.91 | 1.42 | 3.05 | 0.82 | 2.64 | 2.03 |
| 3.16 | 6.5 | 1.07 | 1.67 | 2.65 | 0.63 | 2.76 | 2.56 |
| 2.16 | 6.8 | 1.07 | 1.47 | 2.93 | 0.56 | 1.65 | 2.67 |
| 3.13 | 6.7 | 0.96 | 1.34 | 2.56 | 1.14 | 0.90 | 3.00 |
| 3.45 | 6.2 | 1.08 | 1.34 | 2.68 | 1.10 | 1.02 | 3.80 |
| 3.31 | 6.3 | 0.91 | 1.81 | 2.87 | 0.93 | 2.00 | 1.82 |
| 3.42 | 6.9 | 1.11 | 1.78 | 3.25 | 0.70 | 3.55 | 2.70 |
| 3.39 | 6.6 | 1.03 | 1.74 | 3.20 | 1.10 | 2.60 | 2.26 |
| 3.36 | 6.5 | 0.96 | 1.10 | 2.78 | 1.07 | 2.78 | 2.92 |
| 3.29 | 5.7 | 1.07 | 1.31 | 3.00 | 0.46 | 2.11 | 5.61 |
| 3.26 | 5.2 | 1.07 | 1.91 | 3.12 | 1.43 | 1.64 | 3.88 |
| 2.96 | 5.0 | 1.08 | 1.77 | 2.66 | 0.73 | 0.92 | 4.12 |
| 3.12 | 3.6 | 0.99 | 1.99 | 2.90 | 1.18 | 2.51 | 4.36 |
| 3.16 | 6.8 | 0.99 | 2.07 | 2.72 | 1.00 | 3.91 | 5.52 |
| 3.11 | 6.5 | 0.91 | 1.79 | 2.80 | 1.05 | 1.58 | 1.82 |
| 3.31 | 6.6 | 0.96 | 1.94 | 2.68 | 1.18 | 3.90 | 1.99 |
| 3.18 | 6.6 | 0.99 | 1.43 | 2.92 | 0.97 | 4.15 | 3.78 |
| 3.27 | 6.7 | 1.07 | 2.07 | 2.80 | 1.06 | 2.50 | 3.23 |
| 3.16 | 6.7 | 0.96 | 1.71 | 2.87 | 1.06 | 1.53 | 3.22 |
| 3.31 | 6.7 | 1.11 | 1.71 | 3.00 | 1.02 | 3.17 | 2.18 |
| 3.24 | 6.8 | 1.00 | 1.71 | 2.42 | 0.72 | 2.42 | 4.21 |
| 3.04 | 6.3 | 1.03 | 1.83 | 2.80 | 0.95 | 1.77 | 6.83 |
| 3.21 | 6.8 | 0.99 | 1.99 | 2.30 | 1.06 | 2.25 | 5.84 |
| 2.56 | 6.5 | 1.08 | 1.79 | 2.30 | 0.88 | 2.19 | 2.26 |
| 3.38 | 6.8 | 0.96 | 1.79 | 1.90 | 1.06 | 2.73 | 4.06 |
| 2.85 | 6.6 | 0.99 | 1.91 | 2.66 | 1.18 | 1.66 | 2.29 |
| 2.96 | 6.6 | 1.08 | 1.94 | 1.54 | 1.06 | 2.41 | 3.60 |
| 3.39 | 6.3 | 1.11 | 1.79 | 2.07 | 0.65 | 2.22 | 5.00 |
| 2.90 | 6.6 | 1.23 | 1.71 | 1.98 | 0.56 | 1.35 | 3.71 |
| 3.36 | 6.5 | 1.11 | 1.74 | 1.89 | 0.96 | 1.78 | 2.33 |
| 3.19 | 7.0 | 1.23 | 1.67 | 2.70 | 0.78 | 2.22 | 6.76 |
| 3.44 | 6.5 | 1.15 | 1.77 | 2.70 | 0.61 | 4.07 | 3.73 |
| 2.72 | 6.6 | 1.22 | 1.85 | 2.62 | 0.84 | 1.85 | 3.37 |
| 3.38 | 6.7 | 1.07 | 1.88 | 2.75 | 1.11 | 2.28 | 3.78 |
| 3.42 | 6.6 | 1.23 | 1.79 | 2.98 | 0.53 | 2.48 | 2.62 |

|      |     |      |      |      |      |      |      |
|------|-----|------|------|------|------|------|------|
| 3.38 | 6.7 | 0.96 | 1.83 | 2.47 | 0.83 | 3.55 | 2.17 |
| 3.21 | 6.8 | 1.03 | 1.91 | 2.70 | 1.01 | 0.96 | 7.54 |
| 3.13 | 6.5 | 0.88 | 1.79 | 2.39 | 0.77 | 1.73 | 3.80 |
| 3.42 | 6.6 | 1.16 | 1.56 | 2.67 | 0.83 | 2.21 | 2.53 |
| 2.72 | 6.2 | 1.03 | 1.79 | 2.82 | 2.11 | 2.79 | 3.26 |
| 2.91 | 6.0 | 0.95 | 1.36 | 2.50 | 0.68 | 2.25 | 3.21 |
| 3.23 | 5.3 | 1.03 | 2.14 | 2.70 | 1.10 | 4.01 | 1.96 |
| 3.23 | 4.1 | 0.68 | 1.71 | 2.95 | 0.73 | 1.77 | 1.07 |
| 3.20 | 6.4 | 1.07 | 2.00 | 2.70 | 0.46 | 1.79 | 1.01 |
| 2.87 | 6.7 | 1.15 | 1.79 | 2.50 | 1.35 | 2.70 | 4.64 |
| 3.16 | 6.5 | 0.87 | 1.80 | 2.54 | 1.08 | 3.18 | 3.20 |
| 2.24 | 6.7 | 0.91 | 1.79 | 2.40 | 0.90 | 2.34 | 3.84 |
| 3.27 | 6.4 | 0.95 | 2.56 | 2.90 | 1.06 | 6.95 | 2.67 |
| 3.16 | 6.8 | 1.10 | 1.71 | 2.91 | 0.57 | 3.59 | 2.13 |
| 2.41 | 6.2 | 0.87 | 1.97 | 2.90 | 0.56 | 2.90 | 1.49 |
| 2.76 | 6.1 | 1.08 | 1.47 | 1.87 | 1.02 | 1.06 | 3.30 |
| 2.94 | 4.1 | 0.96 | 1.99 | 2.47 | 1.22 | 1.28 | 5.15 |
| 2.63 |     | 0.99 | 1.99 | 2.62 | 0.61 | 2.01 | 2.08 |
| 3.26 |     | 0.91 | 2.02 | 2.42 | 1.22 | 0.94 | 4.32 |
| 3.23 |     | 1.08 | 2.03 | 2.91 | 2.29 | 3.02 | 4.72 |
| 3.29 |     | 1.11 | 1.79 | 2.75 | 1.24 | 2.51 | 2.87 |
| 3.47 |     | 0.95 | 1.71 | 2.50 | 4.54 | 2.52 | 2.32 |
| 3.01 |     | 1.03 | 1.79 | 2.34 | 0.90 | 2.69 | 3.72 |
| 2.72 |     | 1.08 | 1.67 | 2.19 | 2.93 | 2.22 | 2.96 |
| 3.54 |     | 0.99 | 1.74 | 2.82 | 1.30 | 3.10 | 2.45 |
| 3.12 |     | 0.95 | 1.94 | 2.82 | 1.27 | 1.63 | 2.12 |
| 3.32 |     | 0.96 | 1.94 | 2.75 | 0.75 | 2.75 | 2.50 |
| 3.46 |     | 1.03 | 1.96 | 2.67 | 1.62 | 2.69 | 2.00 |
| 3.33 |     | 0.87 | 1.76 | 2.67 | 1.17 | 2.76 | 3.86 |
| 3.38 |     | 0.95 | 1.71 | 2.39 | 0.77 | 2.74 | 3.36 |
| 2.99 |     | 0.96 | 1.87 | 2.62 | 0.92 | 2.10 | 2.79 |
| 3.36 |     | 0.96 | 1.63 | 2.27 | 1.00 | 1.39 | 3.88 |
| 3.46 |     | 0.99 | 1.47 | 1.99 | 0.83 | 1.27 | 3.26 |
| 3.32 |     | 0.95 | 1.37 | 2.54 | 0.75 | 5.17 | 2.97 |
| 3.34 |     | 0.87 | 1.53 | 2.75 | 1.24 | 2.93 | 3.51 |

|      |      |      |      |      |      |      |
|------|------|------|------|------|------|------|
| 3.46 | 0.83 | 1.20 | 2.67 | 1.05 | 1.40 | 5.24 |
| 3.27 | 0.91 | 1.16 | 1.91 | 0.70 | 1.86 | 2.59 |
| 3.38 | 1.03 | 1.11 | 2.62 | 1.02 | 2.84 | 3.41 |
| 3.20 | 1.07 | 1.39 | 2.54 | 0.58 | 4.05 | 4.78 |
| 3.53 | 0.99 | 1.23 | 2.67 | 0.83 | 1.72 | 8.82 |
| 3.42 | 1.08 | 1.47 | 2.08 | 1.00 | 2.20 | 3.25 |
| 3.52 | 1.02 | 1.56 | 1.87 | 1.01 | 2.11 | 3.36 |
| 3.44 | 0.87 | 1.90 | 2.75 | 0.89 | 2.58 | 2.06 |
| 3.50 | 0.87 | 1.90 | 3.58 | 1.06 | 2.13 | 3.08 |
| 3.42 | 0.87 | 1.93 | 2.75 | 1.06 | 1.45 | 3.18 |
| 3.40 | 0.91 | 1.96 | 2.39 | 0.95 | 0.83 | 4.68 |
| 2.95 | 0.96 | 1.70 | 2.67 | 1.74 | 2.34 | 3.11 |
| 3.29 | 0.99 | 1.76 | 2.62 | 0.68 | 1.77 | 5.14 |
| 3.29 | 0.95 | 1.70 | 2.54 | 1.30 | 3.54 | 3.68 |
| 3.49 | 1.07 | 2.06 | 2.42 | 0.93 | 2.80 | 4.39 |
| 3.21 | 0.90 | 1.93 | 2.62 | 0.78 | 1.67 | 1.34 |
| 3.38 | 0.83 | 1.70 | 2.75 | 0.70 | 1.57 | 2.65 |
| 3.29 | 0.94 | 1.82 | 1.99 | 0.56 | 3.86 | 3.29 |
| 3.46 | 1.06 | 1.42 | 2.75 | 1.28 | 2.45 | 3.32 |
| 3.21 | 1.02 | 1.78 | 2.75 | 1.06 | 1.54 | 1.62 |
| 3.43 | 1.02 | 1.98 | 2.47 | 1.80 | 1.62 | 3.31 |
| 2.41 | 0.90 | 1.90 | 2.47 | 0.56 | 1.34 | 5.65 |
| 2.44 | 0.98 | 1.98 | 2.76 | 1.06 | 2.52 | 0.87 |
| 3.23 | 0.95 | 2.06 | 2.25 | 1.09 | 1.52 | 1.82 |
| 3.12 | 0.95 | 1.90 | 1.87 | 1.11 | 2.80 | 3.85 |
| 3.21 | 1.02 | 2.00 | 1.87 | 1.12 | 0.93 | 3.96 |
| 2.91 | 0.90 | 1.82 | 2.54 | 0.98 | 3.56 | 3.54 |
| 3.17 | 0.87 | 1.86 | 2.07 | 0.41 | 1.50 | 3.48 |
| 2.56 | 1.18 | 2.13 | 2.93 | 1.10 | 2.01 | 2.97 |
| 3.31 | 1.02 | 1.47 | 2.77 | 1.27 | 3.12 | 2.68 |
| 3.15 | 0.98 | 1.62 | 2.82 | 0.62 | 3.51 | 3.80 |
| 3.42 | 1.02 | 1.74 | 2.69 | 0.95 | 2.33 | 2.42 |
| 3.11 | 1.10 | 1.90 | 2.61 | 0.56 | 1.53 | 3.29 |
| 2.96 | 0.94 | 1.96 | 2.71 | 0.94 | 8.06 | 3.75 |
| 3.29 | 0.98 | 1.62 | 2.70 | 0.76 | 1.74 | 3.68 |

|      |      |      |      |      |      |      |
|------|------|------|------|------|------|------|
| 3.31 | 0.98 | 1.96 | 2.82 | 0.56 | 3.33 | 3.22 |
| 3.22 | 1.02 | 2.07 | 2.73 | 1.22 | 1.58 | 2.82 |
| 3.29 | 0.95 | 2.08 | 2.81 | 1.05 | 1.34 | 2.07 |
| 3.15 | 1.10 | 1.74 | 2.61 | 1.48 | 3.13 | 2.07 |
| 2.72 | 1.02 | 1.94 | 2.81 | 1.08 | 2.95 | 5.66 |
| 3.26 | 1.02 | 1.98 | 2.61 | 1.95 | 2.25 | 1.90 |
| 3.18 | 0.90 | 1.79 | 2.69 | 1.03 | 2.32 | 7.61 |
| 3.27 | 0.79 | 1.86 | 2.64 | 2.07 | 3.11 | 9.08 |
| 3.09 | 0.95 | 2.02 | 2.47 | 0.92 | 1.50 | 2.34 |
| 3.42 | 1.18 | 1.82 | 2.73 | 1.34 | 2.04 | 4.53 |
| 3.06 | 0.95 | 1.82 | 2.97 | 1.23 | 2.67 | 3.68 |
| 3.31 | 1.18 | 2.02 | 2.86 | 1.23 | 3.37 | 4.20 |
| 3.14 | 1.02 | 1.90 | 2.69 | 0.96 | 3.76 | 2.55 |
| 3.25 | 0.90 | 2.06 | 2.70 | 0.82 | 2.57 | 3.52 |
| 3.33 | 0.95 | 1.90 | 2.80 | 1.35 | 2.48 | 3.59 |
| 3.13 | 0.87 | 1.78 | 2.28 | 0.99 | 1.07 | 2.81 |
| 3.36 | 0.79 | 2.18 | 2.67 | 1.23 | 2.71 | 1.91 |
| 3.04 | 0.90 | 1.90 | 3.07 | 0.95 | 2.84 | 3.06 |
| 3.39 | 1.06 | 1.62 | 2.50 | 0.93 | 2.34 | 2.70 |
| 3.20 | 0.95 | 1.34 | 2.46 | 0.73 | 1.20 | 2.33 |
| 3.31 | 1.02 | 1.56 | 2.78 | 1.35 | 2.57 | 3.59 |
| 3.38 | 1.10 | 1.28 | 2.61 | 0.77 | 0.67 | 3.61 |
| 3.21 | 0.90 | 1.56 | 2.68 | 1.19 | 2.88 | 2.37 |
| 3.32 | 0.94 | 0.96 | 2.46 | 1.17 | 2.01 | 5.11 |
| 3.31 | 1.06 | 0.92 | 2.89 | 1.06 | 3.32 | 2.48 |
| 3.38 | 0.90 | 1.74 | 2.82 | 0.97 | 2.83 | 1.90 |
| 3.31 | 1.10 | 1.83 | 2.77 | 0.78 | 3.64 | 3.17 |
| 2.81 | 0.98 | 1.83 | 3.00 | 0.89 | 1.68 | 2.22 |
| 2.98 | 0.98 | 1.79 | 2.53 | 0.89 | 1.99 | 2.09 |
| 2.91 | 1.02 | 1.87 | 2.79 | 0.97 | 2.37 | 3.06 |
| 2.55 | 0.83 | 1.74 | 2.98 | 0.97 | 2.55 | 1.54 |
| 2.67 | 0.87 | 1.70 | 1.74 | 0.92 | 2.78 | 3.70 |
| 3.14 | 0.90 | 1.81 | 2.61 | 1.06 | 2.45 | 2.22 |
| 2.17 | 0.79 | 2.01 | 1.82 | 0.93 | 6.71 | 2.39 |
| 3.27 | 0.90 | 2.14 | 3.05 | 1.46 | 1.90 | 2.78 |

|      |      |      |      |      |      |      |
|------|------|------|------|------|------|------|
| 2.24 | 0.95 | 1.74 | 2.89 | 0.85 | 2.88 | 4.84 |
| 2.24 | 0.98 | 1.83 | 2.87 | 1.11 | 1.68 | 2.28 |
| 3.22 | 0.87 | 1.81 | 2.89 | 1.16 | 3.14 | 2.78 |
| 2.07 | 0.86 | 2.10 | 2.77 | 0.95 | 2.40 | 3.78 |
| 3.45 | 0.95 | 1.89 | 2.13 | 1.31 | 3.06 | 4.83 |
| 3.15 | 1.02 | 2.26 | 2.85 | 1.06 | 2.34 | 1.80 |
| 3.11 | 1.15 | 1.87 | 2.89 | 1.62 | 1.53 | 2.39 |
| 3.01 | 1.08 | 1.79 | 2.89 | 1.11 | 1.44 | 1.86 |
| 3.09 | 0.96 | 1.63 | 2.97 | 1.10 | 2.09 | 1.23 |
| 3.29 | 0.99 | 1.98 | 1.82 | 0.95 | 3.06 | 2.24 |
| 3.26 | 0.99 | 1.62 | 2.28 | 1.17 | 2.28 | 1.99 |
| 3.08 | 0.96 | 1.82 | 2.26 | 1.18 | 2.45 | 4.04 |
| 3.08 | 0.91 | 1.87 | 1.47 | 1.15 | 5.47 | 4.28 |
| 3.27 | 1.07 | 1.94 | 2.65 | 1.39 | 2.29 | 3.39 |
| 3.06 | 1.08 | 1.94 | 2.65 | 1.36 | 3.22 | 3.19 |
| 3.09 | 1.11 | 1.79 | 2.69 | 1.04 | 0.88 | 4.56 |
| 3.10 | 1.08 | 1.99 | 2.34 | 1.19 | 5.28 | 2.22 |
| 3.23 | 0.99 | 1.94 | 2.62 | 1.39 | 1.81 | 2.93 |
| 3.12 | 0.99 | 1.87 | 2.64 | 1.07 | 1.18 | 3.87 |
| 2.99 | 0.99 | 1.94 | 2.33 | 1.17 | 2.53 | 4.34 |
| 3.16 | 0.99 | 1.71 | 2.25 | 1.20 | 2.61 | 5.80 |
| 2.92 | 0.96 | 1.86 | 2.65 | 0.84 | 2.48 | 3.56 |
| 3.02 | 0.91 | 1.86 | 2.89 | 1.17 | 3.71 | 3.65 |
| 2.92 | 0.91 | 2.01 | 2.73 | 1.14 | 1.06 | 1.48 |
| 3.01 | 0.99 | 1.97 | 2.62 | 1.55 | 2.59 | 3.25 |
| 2.81 | 1.00 | 2.13 | 2.62 | 1.35 | 2.73 | 3.75 |
| 3.04 | 0.76 | 1.90 | 2.65 | 1.67 | 2.97 | 2.95 |
| 3.15 | 0.83 | 1.70 | 2.41 | 1.07 | 2.39 | 1.71 |
| 3.04 | 0.83 | 1.62 | 3.05 | 1.11 | 2.97 | 3.53 |
| 3.24 | 0.91 | 2.07 | 2.40 | 1.34 | 6.20 | 3.59 |
| 3.09 | 0.87 | 1.79 | 2.62 | 0.99 | 1.45 | 2.50 |
| 2.97 | 0.88 | 2.07 | 2.73 | 1.25 | 2.76 | 1.49 |
| 3.04 | 0.91 | 1.66 | 2.73 | 0.84 | 2.72 | 3.30 |
| 3.29 | 0.91 | 1.81 | 2.73 | 1.24 | 2.08 | 3.27 |
| 3.23 | 1.07 | 2.06 | 2.73 | 2.82 | 3.09 | 7.85 |

|      |      |      |      |      |      |      |
|------|------|------|------|------|------|------|
| 3.19 | 0.99 | 1.89 | 2.68 | 1.62 | 3.17 | 5.13 |
| 3.27 | 0.87 | 1.98 | 2.48 | 1.44 | 4.17 | 3.28 |
| 2.76 | 0.83 | 1.99 | 2.09 | 1.14 | 2.71 | 4.34 |
| 2.88 | 0.83 | 1.97 | 2.42 | 1.35 | 3.98 | 1.28 |
| 3.22 | 0.99 | 1.62 | 2.68 | 1.17 | 1.85 | 3.31 |
| 2.39 | 1.07 | 1.74 | 2.57 | 1.55 | 1.78 | 3.13 |
| 1.83 | 1.07 | 1.82 | 2.82 | 0.92 | 1.78 | 4.11 |
| 2.34 | 1.07 | 1.47 | 2.53 | 1.50 | 2.56 | 4.01 |
| 3.11 | 0.83 | 1.94 | 2.67 | 1.36 | 4.56 | 3.95 |
| 1.39 | 0.88 | 1.89 | 2.89 | 2.27 | 2.98 | 2.43 |
| 3.05 | 0.91 | 2.01 | 2.69 | 0.91 | 2.92 | 3.31 |
| 2.21 | 1.11 | 1.93 | 2.68 | 1.20 | 2.08 | 2.60 |
| 2.53 | 0.91 | 2.05 | 2.72 | 1.05 | 2.78 | 3.76 |
|      | 1.03 | 1.93 | 2.69 | 1.11 | 1.19 | 7.96 |
|      | 0.99 | 1.97 | 2.56 | 1.00 | 2.53 | 3.72 |
|      | 0.83 | 1.81 | 2.62 | 1.13 | 2.05 | 3.23 |
|      | 0.76 | 1.81 | 2.60 | 1.33 | 2.16 | 3.11 |
|      | 1.19 | 2.01 | 2.80 | 1.35 | 1.70 | 3.95 |
|      | 0.88 | 1.89 | 2.40 | 1.35 | 1.91 | 2.55 |
|      | 0.92 | 2.21 | 2.40 | 0.95 | 3.36 | 4.79 |
|      | 0.91 | 1.81 | 2.76 | 1.02 | 2.34 | 2.68 |
|      | 0.91 | 1.81 | 2.75 | 1.35 | 1.57 | 3.64 |
|      | 0.99 | 1.85 | 2.68 | 1.23 | 2.36 | 2.35 |
|      | 0.71 | 1.93 | 2.73 | 1.34 | 1.15 | 4.45 |
|      | 0.91 | 1.89 | 2.80 | 1.45 | 1.83 | 3.27 |
|      | 1.07 | 1.81 | 2.33 | 2.09 | 3.94 | 0.95 |
|      | 0.91 | 2.01 | 2.49 | 1.23 | 3.17 | 1.84 |
|      | 0.88 | 1.89 | 2.56 | 1.02 | 2.84 | 3.43 |
|      | 0.91 | 1.81 | 2.72 | 1.54 | 1.30 | 1.68 |
|      | 0.91 | 1.69 | 2.88 | 0.85 | 1.40 | 2.81 |
|      | 1.10 | 1.77 | 1.66 | 1.73 | 2.90 | 3.16 |
|      | 1.07 | 1.81 | 1.89 | 0.73 | 1.79 | 3.01 |
|      | 1.07 | 1.77 | 2.07 | 1.07 | 2.99 | 5.40 |
|      | 1.02 | 1.85 | 2.87 | 1.20 | 1.89 | 1.67 |
|      | 0.99 | 2.05 | 2.60 | 1.35 | 2.95 | 3.88 |

|      |      |      |      |      |      |
|------|------|------|------|------|------|
| 0.91 | 1.38 | 2.87 | 1.25 | 4.22 | 3.98 |
| 1.07 | 1.93 | 2.64 | 1.44 | 2.48 | 4.15 |
| 0.87 | 1.65 | 2.64 | 1.35 | 1.43 | 3.26 |
| 0.99 | 1.77 | 2.56 | 1.25 | 0.97 | 3.67 |
| 0.91 | 2.09 | 2.59 | 1.34 | 0.90 | 7.86 |
| 0.87 | 1.85 | 2.80 | 1.35 | 0.81 | 2.22 |
| 1.07 | 1.85 | 2.72 | 1.04 | 0.67 | 3.31 |
| 1.02 | 1.97 | 2.80 | 1.15 | 2.34 | 2.29 |
| 1.10 | 1.97 | 2.80 | 1.09 | 3.89 | 1.75 |
| 0.98 | 2.01 | 1.69 | 2.00 | 4.24 | 2.99 |
| 1.03 | 1.62 | 2.64 | 1.92 | 3.39 | 3.50 |
| 1.15 | 1.62 | 2.68 | 1.07 | 2.52 | 2.19 |
| 0.90 | 1.93 | 2.80 | 1.15 | 3.04 | 3.61 |
| 1.07 | 1.89 | 2.64 | 1.04 | 1.91 | 3.05 |
| 0.99 | 1.69 | 2.60 | 0.90 | 1.80 | 3.28 |
| 0.87 | 1.85 | 2.72 | 0.88 | 2.32 | 4.01 |
| 0.99 | 1.89 | 2.13 | 1.50 | 3.43 | 4.78 |
| 0.83 | 1.81 | 2.09 | 1.17 | 1.50 | 3.52 |
| 0.99 | 1.89 | 2.28 | 1.25 | 3.35 | 5.19 |
| 0.90 | 1.89 | 2.21 | 0.83 | 2.98 | 4.64 |
| 0.83 | 1.62 | 1.81 | 1.73 | 2.57 | 2.39 |
| 0.91 | 1.93 | 2.52 | 0.86 | 1.94 | 2.29 |
| 0.91 | 1.85 | 2.72 | 0.68 | 2.70 | 4.87 |
| 0.91 | 1.73 | 2.64 | 1.19 | 3.06 | 3.97 |
| 0.87 | 1.77 | 2.52 | 0.95 | 2.36 | 1.69 |
| 0.87 | 1.85 | 2.72 | 1.07 | 2.06 | 1.74 |
| 0.99 | 1.69 | 2.80 | 0.95 | 2.28 | 2.56 |
| 0.91 | 1.85 | 2.64 | 0.95 | 2.53 | 2.96 |
| 0.99 | 1.62 | 2.72 | 0.95 | 2.17 | 1.82 |
| 0.83 | 1.89 | 2.48 | 1.07 | 2.96 | 3.92 |
| 0.99 | 1.85 | 2.64 | 0.82 | 3.06 | 4.21 |
| 1.07 | 1.77 | 1.81 | 1.14 | 3.21 | 2.98 |
| 0.83 | 1.26 | 2.64 | 0.95 | 1.93 | 3.93 |
| 0.91 | 1.49 | 2.72 | 1.05 | 2.48 | 2.92 |
| 0.95 | 1.34 | 2.87 | 0.88 | 2.48 | 2.13 |

|      |      |      |      |      |      |
|------|------|------|------|------|------|
| 0.99 | 1.45 | 2.72 | 0.99 | 2.96 | 3.59 |
| 1.02 | 1.62 | 2.72 | 0.78 | 2.94 | 5.78 |
| 0.99 | 1.02 | 2.44 | 1.64 | 2.83 | 3.31 |
| 0.75 | 2.05 | 2.80 | 1.03 | 2.40 | 2.76 |
| 0.79 | 1.34 | 2.72 | 0.56 | 0.79 | 2.57 |
| 0.76 | 1.57 | 2.40 | 1.08 | 0.62 | 1.74 |
| 0.95 | 1.77 | 2.72 | 0.75 | 0.68 | 2.16 |
| 0.83 | 2.10 | 2.92 | 0.79 | 2.14 | 1.79 |
| 0.95 | 1.94 | 2.13 | 0.90 | 2.28 | 3.68 |
| 0.99 | 1.94 | 2.48 | 0.95 | 3.19 | 4.01 |
| 1.03 | 1.86 | 2.80 | 1.16 | 2.39 | 5.03 |
| 0.99 | 1.99 | 2.64 | 1.08 | 2.87 | 6.83 |
| 1.10 | 2.03 | 2.56 | 1.15 | 2.56 | 1.78 |
| 1.07 | 1.94 | 2.48 | 0.82 | 2.06 | 5.15 |
| 0.95 | 1.80 | 2.28 | 1.51 | 2.09 | 2.51 |
| 1.06 | 1.98 | 2.52 | 1.50 | 2.52 | 3.95 |
| 1.03 | 2.06 | 2.72 | 0.96 | 2.07 | 4.34 |
| 0.90 | 2.07 | 2.56 | 0.91 | 3.64 | 0.72 |
| 0.87 | 1.91 | 2.48 | 1.18 | 2.94 | 0.90 |
| 0.95 | 2.03 | 2.56 | 0.62 | 2.56 | 2.71 |
| 0.87 | 1.98 | 2.72 | 0.56 | 2.49 | 4.83 |
| 0.79 | 1.90 | 2.56 | 1.15 | 2.86 | 5.78 |
| 0.83 | 2.06 | 2.48 | 0.95 | 2.06 | 4.41 |
| 1.07 | 1.79 | 2.36 | 1.07 | 3.06 | 3.32 |
| 0.83 | 1.82 | 2.72 | 0.99 | 2.87 | 3.97 |
| 0.95 | 1.94 | 2.64 | 1.07 | 3.13 | 2.55 |
| 0.75 | 1.88 | 2.60 | 1.22 | 3.08 | 2.64 |
| 0.83 | 1.90 | 2.72 | 1.02 | 4.73 | 2.88 |
| 0.98 | 1.78 | 2.44 | 1.16 | 3.21 | 4.05 |
| 1.02 | 1.94 | 2.64 | 2.53 | 1.68 | 2.42 |
| 0.91 | 1.68 | 1.18 | 1.11 | 3.03 | 4.23 |
| 0.87 | 1.40 | 2.44 | 1.00 | 1.92 | 3.92 |
| 0.90 | 1.87 | 1.62 | 1.34 | 4.14 | 3.27 |
| 0.87 | 1.70 | 0.87 | 0.67 | 2.69 | 3.19 |
| 0.90 | 1.62 | 2.88 | 0.78 | 3.29 | 3.66 |

|      |      |      |      |      |      |
|------|------|------|------|------|------|
| 0.91 | 1.83 | 2.97 | 0.79 | 1.79 | 3.63 |
| 0.87 | 1.82 | 2.46 | 2.04 | 2.41 | 2.71 |
| 0.87 | 2.02 | 2.67 | 0.68 | 2.42 | 2.68 |
| 0.71 | 1.71 | 2.75 | 0.98 | 1.72 | 3.56 |
| 1.10 | 1.99 | 2.71 | 1.17 | 2.28 | 3.15 |
| 0.99 | 1.90 | 2.79 | 1.02 | 2.79 | 3.00 |
| 0.75 | 2.02 | 2.67 | 1.07 | 3.08 | 1.02 |
| 1.07 | 1.78 | 2.66 | 0.80 | 0.82 | 4.03 |
| 1.07 | 1.76 | 2.61 | 0.84 | 2.58 | 2.70 |
| 0.99 | 1.34 | 2.67 | 0.83 | 1.04 | 1.28 |
| 1.06 | 1.62 | 3.16 | 0.83 | 1.44 | 3.47 |
| 0.87 | 2.02 | 2.76 | 0.95 | 3.56 | 3.80 |
| 1.07 | 1.99 | 2.67 | 0.46 | 1.78 | 3.25 |
| 1.07 | 1.82 | 2.69 | 0.67 | 2.09 | 3.53 |
| 1.07 | 1.91 | 2.10 | 0.62 | 2.44 | 2.78 |
| 0.99 | 1.62 | 2.73 | 0.83 | 2.09 | 3.30 |
| 1.02 | 1.78 | 2.69 | 1.11 | 1.62 | 3.67 |
| 1.07 | 1.74 | 2.86 | 0.95 | 1.95 | 4.17 |
| 1.02 | 1.78 | 2.10 | 1.17 | 1.99 | 3.42 |
| 0.99 | 1.82 | 2.61 | 0.63 | 2.57 | 3.17 |
| 0.87 | 1.62 | 2.61 | 1.03 | 2.31 | 1.25 |
| 0.79 | 1.47 | 2.14 | 1.13 | 2.96 | 1.21 |
| 0.36 | 1.78 | 1.88 | 0.62 | 2.63 | 4.03 |
| 0.90 | 1.78 | 1.99 | 1.06 | 3.30 | 3.34 |
| 0.99 | 1.74 | 2.38 | 0.85 | 3.69 | 3.87 |
| 0.91 | 1.88 | 2.61 | 1.17 | 2.95 | 3.40 |
| 0.91 | 1.93 | 2.89 | 1.34 | 2.71 | 2.90 |
| 1.07 | 1.90 | 2.46 | 0.85 | 2.25 | 2.78 |
| 0.83 | 1.82 | 2.73 | 0.69 | 2.48 | 3.43 |
| 0.83 | 1.42 | 2.70 | 0.90 | 2.16 | 3.28 |
| 0.87 | 1.34 | 2.76 | 1.55 | 3.11 | 4.71 |
| 0.87 | 1.34 | 2.69 | 1.02 | 2.81 | 3.56 |
| 0.79 | 1.56 | 2.91 | 2.17 | 1.35 | 3.77 |
| 0.95 | 1.90 | 2.41 | 1.03 | 2.19 | 3.30 |
| 1.06 | 2.01 | 2.73 | 0.97 | 5.61 | 3.67 |

|      |      |      |      |      |      |
|------|------|------|------|------|------|
| 0.99 | 2.06 | 2.69 | 0.56 | 1.99 | 2.57 |
| 0.87 | 1.62 | 2.50 | 1.11 | 3.16 | 3.88 |
| 0.83 | 1.97 | 2.89 | 1.02 | 4.58 | 1.35 |
| 0.91 | 1.78 | 2.81 | 1.10 | 2.61 | 3.46 |
| 1.02 | 1.89 | 2.67 | 1.03 | 2.95 | 4.42 |
| 0.99 | 1.54 | 2.67 | 1.87 | 2.70 | 2.43 |
| 1.07 | 1.94 | 2.49 | 0.56 | 1.82 | 3.58 |
| 0.99 | 1.86 | 2.44 | 0.43 | 3.11 | 2.88 |
| 0.91 | 1.89 | 2.53 | 1.90 | 0.90 | 2.20 |
| 0.99 | 2.06 | 1.82 | 0.91 | 1.69 | 3.49 |
| 0.87 | 1.85 | 2.13 | 0.50 | 4.36 | 4.40 |
| 0.79 | 1.42 | 2.98 | 0.93 | 2.49 | 5.78 |
| 1.02 | 1.77 | 2.53 | 0.72 | 3.00 | 4.18 |
| 0.99 | 1.74 | 2.85 | 0.95 | 3.74 | 4.43 |
| 0.99 | 1.70 | 2.69 | 2.09 | 2.95 | 3.77 |
| 0.99 | 1.93 | 2.81 | 1.74 | 3.97 | 2.11 |
| 0.91 | 1.98 | 2.10 | 1.05 | 1.78 | 3.92 |
| 0.99 | 1.74 | 2.26 | 0.87 | 1.81 | 2.34 |
| 0.99 | 1.62 | 2.02 | 0.83 | 3.89 | 1.69 |
| 0.90 | 1.81 | 2.69 | 1.73 | 1.93 | 4.75 |
| 0.95 | 1.94 | 2.64 | 1.11 | 2.71 | 2.30 |
| 1.02 | 2.06 | 2.78 | 0.56 | 1.37 | 2.67 |
| 1.07 | 1.78 | 2.86 | 0.68 | 1.15 | 3.49 |
| 0.87 | 1.90 | 1.62 | 0.52 | 2.91 | 1.20 |
| 0.90 | 1.78 | 1.08 | 1.09 | 2.91 | 1.82 |
| 1.15 | 1.93 | 2.53 | 0.95 | 3.84 | 2.16 |
| 0.99 | 1.98 | 2.00 | 0.89 | 2.87 | 0.72 |
| 1.07 | 1.90 | 1.96 | 0.70 | 2.34 | 0.90 |
| 0.95 | 2.06 | 2.89 | 0.90 | 4.79 | 3.88 |
| 0.91 | 1.81 | 2.73 | 1.13 | 2.75 | 4.68 |
| 0.87 | 1.98 | 2.26 | 0.83 | 3.14 | 2.25 |
| 1.07 | 1.94 | 2.77 | 1.14 | 2.39 | 2.77 |
| 0.99 | 1.38 | 2.85 | 0.84 | 2.96 | 3.21 |
| 1.15 | 1.86 | 2.69 | 0.67 | 1.68 | 2.87 |
| 0.83 | 1.73 | 2.29 | 0.61 | 3.16 | 2.39 |

|      |      |      |      |      |      |
|------|------|------|------|------|------|
| 1.02 | 1.66 | 2.89 | 0.86 | 2.39 | 2.45 |
| 0.83 | 1.90 | 2.65 | 0.83 | 3.10 | 2.61 |
| 1.07 | 1.86 | 2.83 | 1.13 | 3.20 | 3.69 |
| 0.87 | 1.78 | 2.61 | 0.78 | 2.14 | 3.60 |
| 0.87 | 1.81 | 2.24 | 0.68 | 3.44 | 4.08 |
| 1.10 | 1.70 | 2.61 | 1.44 | 3.16 | 3.96 |
| 1.02 | 1.78 | 2.28 | 0.55 | 3.11 | 4.75 |
| 0.95 | 1.89 | 2.61 | 0.63 | 2.66 | 5.31 |
| 1.15 | 1.81 | 2.46 | 0.72 | 2.71 | 3.96 |
| 0.87 | 1.97 | 2.38 | 0.95 | 2.85 | 2.52 |
| 1.07 | 2.02 | 2.61 | 0.95 | 4.55 | 3.98 |
| 1.23 | 1.98 | 2.56 | 0.67 | 0.88 | 2.93 |
| 1.03 | 1.62 | 2.61 | 0.71 | 1.44 | 3.33 |
| 0.95 | 1.47 | 2.65 | 0.95 | 1.02 | 4.13 |
| 1.08 | 2.01 | 2.96 | 0.95 | 2.18 | 3.72 |
| 1.02 | 1.62 | 2.89 | 1.24 | 2.28 | 4.64 |
| 0.99 | 1.82 | 2.53 | 1.28 | 2.63 | 2.56 |
| 0.99 | 1.77 | 2.81 | 0.50 | 1.35 | 3.21 |
| 0.99 | 2.02 | 2.81 | 1.03 | 2.56 | 2.19 |
| 0.99 | 1.77 | 3.00 | 0.83 | 2.95 | 3.33 |
| 0.95 | 1.42 | 2.46 | 0.57 | 2.99 | 2.37 |
| 0.91 | 1.54 | 2.76 | 0.67 | 2.86 | 5.32 |
| 0.99 | 1.85 | 2.53 | 1.30 | 2.83 | 3.49 |
| 0.95 | 1.77 | 3.05 | 0.88 | 1.20 | 3.57 |
| 1.08 | 1.81 | 2.40 | 0.68 | 2.80 | 4.51 |
| 0.88 | 1.73 | 2.69 | 0.79 | 2.88 | 2.48 |
| 0.95 | 1.82 | 2.17 | 1.06 | 2.48 | 1.34 |
| 0.99 | 1.49 | 2.65 | 1.11 | 1.20 | 2.48 |
| 0.83 | 1.62 | 2.06 | 1.06 | 4.10 | 3.29 |
| 1.10 | 1.54 | 2.61 | 1.08 | 5.14 | 2.82 |
| 0.87 | 1.42 | 2.89 | 0.97 | 2.34 | 3.32 |
| 0.95 | 1.62 | 2.81 | 0.95 | 3.37 | 3.53 |
| 0.91 | 1.74 | 2.65 | 1.62 | 2.28 | 3.83 |
| 0.88 | 1.93 | 2.80 | 0.88 | 2.67 | 2.81 |
| 0.83 | 1.78 | 2.69 | 1.28 | 2.93 | 1.87 |

|      |      |      |      |      |      |
|------|------|------|------|------|------|
| 0.87 | 1.82 | 2.68 | 0.51 | 2.14 | 2.94 |
| 0.83 | 1.70 | 2.77 | 0.80 | 3.18 | 6.06 |
| 1.02 | 1.78 | 2.66 | 0.67 | 1.86 | 2.90 |
| 1.03 | 1.78 | 2.69 | 0.85 | 1.28 | 3.85 |
| 1.08 | 1.97 | 2.69 | 0.39 | 2.72 | 2.74 |
| 1.22 | 1.78 | 2.60 | 1.64 | 1.29 | 4.06 |
| 0.95 | 1.89 | 2.46 | 2.12 | 2.06 | 1.13 |
| 1.03 | 1.90 | 2.69 | 1.12 | 2.51 | 0.70 |
| 0.96 | 1.66 | 2.81 | 1.14 | 1.67 | 4.55 |
| 1.11 | 1.30 | 2.06 | 0.69 | 2.88 | 3.80 |
| 0.87 | 1.34 | 2.81 | 0.70 | 1.86 | 4.96 |
| 0.88 | 1.81 | 2.77 | 1.10 | 3.17 | 3.69 |
| 0.95 | 0.75 | 2.73 | 0.87 | 4.11 | 2.89 |
| 1.03 | 2.06 | 2.69 | 0.96 | 3.39 | 5.35 |
| 0.95 | 2.06 | 2.73 | 0.56 | 2.70 | 3.52 |
| 0.95 | 1.74 | 2.36 | 1.22 | 4.76 | 3.95 |
| 1.03 | 1.82 | 2.77 | 0.73 | 2.71 | 3.21 |
| 0.99 | 1.98 | 2.32 | 1.03 | 2.39 | 3.93 |
| 0.91 | 1.82 | 2.53 | 0.79 | 2.82 | 2.29 |
| 0.87 | 2.13 | 2.10 | 1.34 | 2.94 | 4.31 |
| 1.15 | 2.06 | 3.09 | 1.51 | 2.85 | 2.79 |
| 1.02 | 1.50 | 2.81 | 1.07 | 2.00 | 4.39 |
| 1.11 | 1.90 | 2.77 | 0.68 | 1.92 | 3.89 |
| 0.83 | 1.42 | 2.73 | 1.07 | 2.95 | 2.67 |
| 0.79 | 1.65 | 2.65 | 1.29 | 2.17 | 1.88 |
| 0.87 | 2.06 | 2.21 | 1.02 | 2.12 | 3.93 |
| 1.03 | 1.90 | 2.85 | 1.62 | 3.27 | 3.15 |
| 0.96 | 1.89 | 2.85 | 3.12 | 1.50 | 3.78 |
| 0.83 | 1.34 | 2.33 | 0.86 | 2.01 | 3.68 |
| 0.79 | 1.78 | 2.33 | 1.28 | 1.85 | 3.50 |
| 0.99 | 1.74 | 2.89 | 1.27 | 1.09 | 3.36 |
| 0.91 | 1.62 | 2.69 | 2.99 | 1.62 | 1.92 |
| 0.87 | 1.62 | 2.61 | 1.25 | 1.54 | 2.09 |
| 0.87 | 1.81 | 2.48 | 1.34 | 2.56 | 3.85 |
| 0.87 | 1.86 | 2.24 | 0.72 | 3.12 | 3.67 |

|      |      |      |      |      |      |
|------|------|------|------|------|------|
| 0.87 | 1.74 | 3.60 | 1.10 | 3.17 | 3.11 |
| 0.99 | 1.90 | 2.81 | 0.56 | 1.67 | 1.52 |
| 0.88 | 1.86 | 2.36 | 0.72 | 2.71 | 3.85 |
| 0.96 | 1.78 | 1.81 | 0.87 | 1.82 | 4.53 |
|      | 1.98 | 2.13 | 0.90 | 4.11 | 6.77 |
|      | 1.78 | 2.02 | 1.00 | 2.91 | 3.06 |
|      | 1.98 | 2.69 | 0.92 | 6.08 | 4.04 |
|      | 1.97 | 2.97 | 1.31 | 1.95 | 3.00 |
|      | 1.86 | 2.57 | 0.85 | 2.92 | 3.65 |
|      | 1.90 | 2.77 | 0.85 | 2.95 | 3.60 |
|      | 1.54 | 2.76 | 0.79 | 2.67 | 3.57 |
|      | 0.87 | 2.41 | 0.67 | 1.50 | 2.22 |
|      | 1.82 | 2.68 | 0.95 | 4.28 | 2.55 |
|      | 1.82 | 2.46 | 0.45 | 1.73 | 4.16 |
|      | 1.73 | 2.26 | 0.63 | 1.36 | 2.64 |
|      | 1.73 | 2.56 | 0.60 | 2.13 | 1.40 |
|      | 1.78 | 2.04 | 0.78 | 3.32 | 2.32 |
|      | 1.78 | 2.68 | 0.79 | 1.17 | 4.64 |
|      | 1.74 | 2.83 | 0.73 | 2.53 | 3.83 |
|      | 2.06 | 2.56 | 0.70 | 1.97 | 3.68 |
|      | 1.85 | 2.85 | 0.83 | 2.09 | 3.45 |
|      | 1.70 | 2.57 | 1.12 | 2.41 | 3.55 |
|      | 1.78 | 2.60 | 0.95 | 2.68 | 3.71 |
|      | 2.09 | 1.90 | 0.78 | 2.19 | 6.16 |
|      | 1.81 | 2.61 | 1.02 | 1.42 | 3.48 |
|      | 1.97 | 2.41 | 1.11 | 1.55 | 3.30 |
|      | 1.98 | 2.77 | 1.18 | 0.92 | 2.20 |
|      | 1.73 | 2.92 | 1.07 | 2.13 | 1.82 |
|      | 1.85 | 2.85 | 1.06 | 2.67 | 0.69 |
|      | 1.70 | 2.69 | 0.77 | 2.06 | 0.50 |
|      | 1.94 | 2.61 | 1.07 | 1.90 | 3.18 |
|      | 1.82 | 2.85 | 1.03 | 3.50 | 2.92 |
|      | 1.70 | 2.33 | 0.82 | 2.01 | 3.91 |
|      | 1.94 | 2.77 | 1.29 | 1.79 | 2.50 |
|      | 1.81 | 2.77 | 1.88 | 3.03 | 3.95 |

|      |      |      |      |      |
|------|------|------|------|------|
| 1.70 | 1.93 | 0.94 | 2.67 | 5.11 |
| 1.70 | 2.77 | 0.95 | 1.34 | 4.28 |
| 1.86 | 1.90 | 0.98 | 1.55 | 3.29 |
| 1.90 | 2.33 | 0.94 | 2.50 | 6.19 |
| 1.86 | 2.80 | 1.34 | 1.79 | 3.20 |
| 1.94 | 2.77 | 0.92 | 2.34 | 2.79 |
| 1.78 | 2.61 | 0.56 | 3.12 | 3.57 |
| 1.78 | 2.85 | 0.68 | 3.08 | 4.22 |
| 1.86 | 2.85 | 0.63 | 3.86 | 3.81 |
| 1.86 | 2.77 | 0.61 | 3.23 | 2.92 |
| 1.65 | 2.85 | 0.81 | 2.24 | 2.20 |
| 1.69 | 2.53 | 0.81 | 3.39 | 2.52 |
| 1.82 | 2.61 | 0.63 | 1.45 | 3.46 |
| 2.36 | 2.61 | 1.36 | 1.57 | 3.63 |
| 1.58 | 2.49 | 1.17 | 2.04 | 2.17 |
| 1.34 | 2.85 | 0.91 | 3.66 | 2.39 |
| 1.50 | 2.69 | 0.68 | 1.64 | 1.38 |
| 1.19 | 2.65 | 0.50 | 2.44 | 2.14 |
| 1.22 | 2.57 | 1.43 | 2.44 | 2.12 |
| 0.87 | 2.61 | 0.95 | 1.74 | 7.20 |
| 1.07 | 2.46 | 0.89 | 2.37 | 3.02 |
| 1.94 | 3.05 | 0.50 | 2.75 | 1.93 |
| 1.91 | 2.69 | 0.78 | 3.04 | 3.28 |
| 1.67 | 2.68 | 0.75 | 2.72 | 3.90 |
| 1.86 | 3.05 | 0.79 | 2.70 | 3.75 |
| 1.91 | 2.72 | 0.57 | 3.03 | 1.84 |
| 1.81 | 2.48 | 0.50 | 2.12 | 2.89 |
| 1.86 | 3.74 | 0.56 | 1.05 | 3.18 |
| 1.50 | 2.53 | 0.85 | 2.22 | 2.90 |
| 1.63 | 2.49 | 0.56 | 2.75 | 1.89 |
| 1.63 | 2.69 | 1.11 | 1.02 | 1.99 |
| 1.94 | 2.92 | 0.89 | 1.82 | 2.53 |
| 2.01 | 2.68 | 1.50 | 2.06 | 3.48 |
| 1.90 | 2.97 | 1.04 | 3.49 | 4.13 |
| 1.90 | 2.24 | 1.77 | 3.12 | 2.51 |

|      |      |      |      |      |
|------|------|------|------|------|
| 1.78 | 1.86 | 0.50 | 2.12 | 2.92 |
| 1.70 | 2.77 | 1.47 | 2.45 | 2.13 |
| 1.83 | 2.13 | 0.71 | 3.92 | 2.41 |
| 1.74 | 2.18 | 1.15 | 2.78 | 4.68 |
| 1.90 | 1.54 | 1.15 | 0.90 | 2.41 |
| 1.67 | 1.66 | 1.15 | 2.95 | 3.45 |
| 1.99 | 3.06 | 0.72 | 3.06 | 1.96 |
| 1.94 | 2.82 | 0.57 | 2.06 | 5.41 |
| 1.81 | 3.05 | 0.77 | 2.67 | 2.12 |
| 1.79 | 3.12 | 1.13 | 2.60 | 3.09 |
| 1.79 | 3.30 | 1.11 | 3.63 | 3.95 |
| 1.89 | 2.88 | 0.62 | 1.42 | 2.03 |
| 1.98 | 3.21 | 0.62 | 1.47 | 2.45 |
| 1.78 | 2.25 | 1.39 | 1.29 | 1.79 |
| 1.94 | 2.75 | 0.95 | 1.17 | 3.64 |
| 1.74 | 3.05 | 0.90 | 2.30 | 1.00 |
| 2.19 | 3.33 | 1.17 | 3.14 | 0.67 |
| 2.06 | 3.07 | 0.72 | 2.78 | 0.70 |
| 1.91 | 3.24 | 0.72 | 3.44 | 1.02 |
| 1.74 | 2.97 | 0.77 | 2.92 | 3.01 |
| 1.91 | 2.96 | 0.51 | 2.26 | 2.39 |
| 1.94 | 3.05 | 2.05 | 5.39 | 4.53 |
| 1.87 | 2.98 | 0.76 | 2.64 | 2.76 |
| 1.81 | 2.57 | 0.55 | 3.78 | 2.56 |
| 2.07 | 2.25 | 0.67 | 2.32 | 3.64 |
| 1.94 | 3.18 | 1.06 | 1.70 | 3.79 |
| 1.79 | 2.25 | 0.56 | 2.63 | 1.56 |
| 1.71 | 1.97 | 0.79 | 3.53 | 2.09 |
| 1.81 | 3.12 | 0.69 | 1.78 | 3.22 |
| 1.94 | 2.41 | 0.96 | 3.31 | 2.34 |
| 1.97 | 3.16 | 0.90 | 3.27 | 3.30 |
| 1.86 | 3.12 | 0.88 | 2.36 | 3.77 |
| 1.97 | 3.30 | 0.51 | 3.11 | 3.88 |
| 1.58 | 3.30 | 0.56 | 4.91 | 5.29 |
| 1.87 | 3.07 | 0.78 | 1.54 | 4.09 |

|      |      |      |      |      |
|------|------|------|------|------|
| 1.87 | 3.00 | 0.83 | 2.86 | 3.11 |
| 1.81 | 2.98 | 1.11 | 3.99 | 4.51 |
| 1.78 | 3.22 | 0.91 | 1.50 | 4.57 |
| 1.74 | 2.89 | 2.00 | 1.67 | 7.22 |
| 1.63 | 2.84 | 0.75 | 2.01 | 3.11 |
| 1.74 | 3.05 | 0.50 | 3.68 | 3.79 |
| 2.02 | 3.26 | 1.26 | 1.13 | 2.31 |
| 1.99 | 3.19 | 0.50 | 2.89 | 3.29 |
| 1.99 | 2.01 | 2.33 | 2.24 | 2.94 |
| 1.81 | 2.96 | 2.46 | 2.45 | 3.59 |
| 1.79 | 3.12 | 3.50 | 1.45 | 1.58 |
| 1.74 | 2.82 | 0.48 | 3.84 | 2.64 |
| 1.94 | 2.34 | 0.68 | 2.54 | 3.02 |
| 1.50 | 3.05 | 1.13 | 1.22 | 3.44 |
| 1.50 | 1.91 | 2.17 | 1.31 | 4.10 |
| 1.56 | 2.92 | 1.05 | 1.67 | 3.50 |
| 1.59 | 2.76 | 0.56 | 1.30 | 1.62 |
| 1.89 | 3.04 | 2.76 | 3.45 | 2.68 |
| 1.43 | 3.25 | 0.89 | 1.45 | 4.38 |
| 1.62 | 2.92 | 0.56 | 2.50 | 3.56 |
| 1.30 | 2.88 | 0.84 | 1.46 | 3.48 |
| 1.26 | 2.80 | 0.68 | 2.99 | 4.92 |
| 1.15 | 2.90 | 0.78 | 1.45 | 2.20 |
| 1.31 | 3.05 | 1.09 | 2.87 | 1.72 |
| 1.38 | 3.09 | 0.67 | 2.34 | 2.63 |
| 0.71 | 2.98 | 0.96 | 3.28 | 1.50 |
|      | 2.96 | 1.10 | 2.87 | 2.33 |
|      | 2.53 | 0.57 | 3.23 | 2.57 |
|      | 3.33 | 1.17 | 1.90 | 4.51 |
|      | 3.22 | 0.70 | 2.57 | 4.07 |
|      | 2.68 | 0.85 | 3.20 | 0.72 |
|      | 3.05 | 1.46 | 1.47 | 3.99 |
|      | 2.89 | 0.60 | 2.41 | 4.19 |
|      | 3.09 | 0.89 | 1.72 | 2.76 |
|      | 2.93 | 0.77 | 2.09 | 3.39 |

|      |      |      |      |
|------|------|------|------|
| 2.89 | 1.07 | 3.27 | 3.62 |
| 3.04 | 1.00 | 2.63 | 5.00 |
| 3.04 | 0.56 | 1.67 | 1.93 |
| 3.20 | 0.88 | 1.34 | 2.25 |
| 3.26 | 0.70 | 2.78 | 2.17 |
| 3.30 | 0.87 | 1.89 | 1.71 |
| 3.40 | 1.25 | 2.79 | 3.18 |
| 2.62 | 1.22 | 2.48 | 3.53 |
| 1.89 | 0.58 | 3.93 | 5.38 |
| 3.04 | 0.95 | 4.55 | 4.18 |
| 2.07 | 0.83 | 0.89 | 3.73 |
| 2.37 | 1.06 | 1.34 | 2.92 |
| 3.38 | 0.68 | 2.60 | 7.46 |
| 2.26 | 0.93 | 2.19 | 2.40 |
|      | 1.16 | 1.95 | 4.19 |
|      | 1.39 | 2.14 | 4.62 |
|      | 0.63 | 1.72 | 3.00 |
|      | 1.22 | 2.47 | 2.53 |
|      | 1.00 | 2.09 | 3.08 |
|      | 1.27 | 2.00 | 2.29 |
|      | 1.34 | 2.51 | 4.03 |
|      | 0.95 | 1.23 | 2.88 |
|      | 1.06 | 0.74 | 3.68 |
|      | 0.78 | 1.67 | 1.39 |
|      | 0.84 | 4.95 | 2.17 |
|      | 0.83 | 3.06 | 5.01 |
|      | 0.91 | 1.10 | 2.04 |
|      | 1.35 | 2.99 | 2.70 |
|      | 1.14 | 3.26 | 2.45 |
|      | 0.67 | 1.17 | 4.91 |
|      | 1.13 | 1.06 | 3.50 |
|      | 1.56 | 2.09 | 4.33 |
|      | 1.39 | 2.55 | 4.06 |
|      | 0.91 | 2.55 | 5.77 |
|      | 0.75 | 2.77 | 3.50 |

|      |      |      |
|------|------|------|
| 0.67 | 4.47 | 2.10 |
| 0.78 | 1.82 | 1.45 |
| 0.57 | 1.96 | 4.91 |
| 0.99 | 4.10 | 2.42 |
| 0.61 | 3.61 | 4.11 |
| 0.79 | 2.09 | 3.01 |
| 1.03 | 1.78 | 0.79 |
| 0.73 | 1.81 | 0.68 |
| 1.51 | 3.29 | 1.61 |
| 0.93 | 3.94 | 0.40 |
| 0.67 | 1.02 | 4.18 |
| 1.35 | 2.68 | 1.89 |
| 1.35 | 1.21 | 3.63 |
| 0.63 | 1.85 | 1.72 |
| 0.56 | 1.67 | 3.59 |
| 1.24 | 1.78 | 1.66 |
| 0.90 | 1.01 | 3.41 |
| 1.05 | 1.85 | 3.19 |
| 0.57 | 2.41 | 4.06 |
| 0.68 | 1.80 | 4.48 |
| 0.83 | 2.68 | 4.24 |
| 1.24 | 4.32 | 2.30 |
| 1.13 | 0.92 | 3.43 |
| 0.68 | 2.65 | 1.43 |
| 0.71 | 5.68 | 1.70 |
| 0.79 | 1.11 | 2.82 |
| 0.91 | 3.08 | 2.63 |
| 0.90 | 2.41 | 2.39 |
| 1.12 | 2.24 | 2.33 |
| 0.79 | 1.88 | 4.15 |
| 0.63 | 1.79 | 3.12 |
| 0.87 | 1.88 | 2.62 |
| 0.80 | 1.55 | 3.71 |
| 0.58 | 2.19 | 2.61 |
| 1.17 | 2.49 | 3.13 |

|      |      |      |
|------|------|------|
| 0.57 | 1.78 | 2.78 |
| 0.41 | 1.34 | 2.79 |
| 0.68 | 1.99 | 2.76 |
| 0.88 | 2.89 | 6.92 |
| 0.78 | 1.69 | 2.04 |
| 0.77 | 2.63 | 1.91 |
| 1.02 | 2.92 | 2.86 |
| 0.67 | 1.69 | 4.75 |
| 0.78 | 4.52 | 2.54 |
| 0.90 | 2.57 | 3.29 |
| 1.13 | 3.37 | 2.60 |
| 0.89 | 3.86 | 2.34 |
| 0.56 | 1.69 | 3.91 |
| 0.96 | 2.53 | 2.94 |
| 0.45 | 1.82 | 2.89 |
| 0.50 | 3.11 | 5.05 |
| 1.12 | 4.07 | 4.89 |
| 1.07 | 1.91 | 1.80 |
| 1.34 | 1.14 | 1.37 |
| 1.17 | 6.62 | 3.72 |
| 0.72 | 3.67 | 1.37 |
| 1.32 | 2.10 | 0.77 |
| 0.75 | 3.41 | 0.69 |
| 0.61 | 7.85 | 4.30 |
| 0.52 | 1.41 | 4.76 |
| 0.78 | 1.79 | 1.52 |
| 0.77 | 1.87 | 1.49 |
| 1.62 | 3.13 | 2.70 |
| 0.98 | 7.40 | 3.36 |
| 0.77 | 1.85 | 2.90 |
| 1.38 | 2.00 | 4.01 |
| 1.10 | 2.34 | 5.47 |
| 0.75 | 1.42 | 2.33 |
| 1.00 | 3.03 | 2.36 |
| 0.68 | 1.64 | 5.00 |

|      |      |      |
|------|------|------|
| 0.69 | 3.28 | 4.38 |
|      | 1.40 | 2.79 |
|      | 2.39 | 2.18 |
|      | 4.29 | 2.40 |
|      | 3.44 | 3.90 |
|      | 3.35 | 4.52 |
|      | 2.70 | 1.14 |
|      | 0.81 | 3.30 |
|      | 0.72 | 2.81 |
|      | 2.00 | 2.84 |
|      | 1.42 | 1.45 |
|      | 2.81 | 3.70 |
|      | 4.60 | 3.58 |
|      | 2.86 | 6.78 |
|      | 2.06 | 3.26 |
|      | 1.65 | 2.50 |
|      | 2.17 | 1.95 |
|      | 1.34 | 2.94 |
|      | 1.97 | 2.20 |
|      | 2.06 | 1.66 |
|      | 1.65 | 1.71 |
|      | 3.51 | 1.95 |
|      | 2.84 | 2.48 |
|      | 3.05 | 1.28 |
|      | 2.18 | 5.09 |
|      | 4.18 | 3.18 |
|      | 1.56 | 2.86 |
|      | 1.95 | 2.57 |
|      | 3.76 | 2.71 |
|      | 2.99 | 2.21 |
|      | 2.12 | 3.16 |
|      | 3.06 | 2.17 |
|      | 2.71 | 1.93 |
|      | 2.29 | 2.45 |
|      | 2.77 | 3.99 |

|      |      |
|------|------|
| 2.64 | 2.14 |
| 2.16 | 2.96 |
| 2.71 | 3.73 |
| 1.50 | 2.29 |
| 2.67 | 5.12 |
| 2.49 | 2.67 |
| 0.88 | 4.58 |
| 3.32 | 2.87 |
| 2.61 | 4.11 |
| 3.85 | 3.19 |
| 1.80 | 1.80 |
| 2.44 | 5.61 |
| 2.48 | 2.69 |
| 3.30 | 4.02 |
| 1.11 | 4.17 |
| 3.91 | 2.09 |
| 2.79 | 4.22 |
| 0.87 | 8.73 |
| 1.71 | 4.12 |
| 1.07 | 2.76 |
| 2.53 | 3.94 |
| 4.58 | 2.14 |
| 1.50 | 1.17 |
| 2.23 | 2.45 |
| 2.48 | 2.29 |
| 2.18 | 2.54 |
| 4.00 | 1.73 |
| 0.94 | 9.37 |
| 2.29 | 0.95 |
| 2.20 | 1.20 |
| 2.86 | 8.63 |
| 2.34 | 1.91 |
| 2.59 | 2.37 |
| 2.93 | 4.37 |
| 2.91 | 1.41 |

|      |      |
|------|------|
| 2.91 | 5.66 |
| 3.28 | 3.89 |
| 2.85 | 3.20 |
| 2.57 | 2.39 |
| 4.10 | 4.32 |
| 3.19 | 1.57 |
| 3.68 | 2.19 |
| 1.85 | 1.79 |
| 3.75 | 2.56 |
| 2.47 | 1.67 |
| 2.00 | 3.55 |
| 2.44 | 6.22 |
| 1.85 | 3.45 |
| 2.17 | 2.56 |
| 2.81 | 2.16 |
| 4.47 | 1.37 |
| 2.94 | 2.57 |
| 2.01 | 2.51 |
| 2.54 | 2.76 |
| 4.64 | 2.25 |
| 0.97 | 4.26 |
| 0.61 | 3.96 |
| 6.06 | 4.38 |
| 1.42 | 5.54 |
| 1.85 | 2.67 |
| 3.34 | 2.64 |
| 2.60 | 4.68 |
| 2.01 | 1.80 |
| 1.07 | 3.24 |
| 5.09 | 3.06 |
| 4.24 | 4.06 |
| 2.27 | 3.31 |
| 1.81 | 2.33 |
| 2.42 | 4.77 |
| 2.34 | 3.71 |

|      |      |
|------|------|
| 4.16 | 1.18 |
| 2.50 | 3.45 |
| 3.21 | 3.44 |
| 1.15 | 4.03 |
| 3.05 | 2.60 |
| 1.64 | 2.37 |
| 2.54 | 3.04 |
| 2.61 | 1.94 |
| 2.13 | 3.98 |
| 2.95 | 3.08 |
| 2.93 | 3.27 |
| 1.94 | 3.43 |
| 2.39 | 3.33 |
| 3.06 | 2.82 |
| 3.56 | 3.48 |
| 3.95 | 1.97 |
| 2.04 | 2.73 |
| 1.80 | 2.47 |
| 2.79 | 5.17 |
| 2.45 | 1.19 |
| 1.00 | 0.82 |
| 1.53 | 3.01 |
| 2.37 | 5.75 |
| 1.82 | 1.78 |
| 3.42 | 3.18 |
| 3.95 | 3.36 |
| 3.33 | 2.93 |
| 3.97 | 4.91 |
| 4.85 | 2.17 |
| 4.07 | 2.39 |
| 2.01 | 2.71 |
| 2.56 | 3.53 |
| 1.94 | 3.05 |
| 1.74 | 3.37 |
| 1.24 | 4.19 |

|      |      |
|------|------|
| 1.27 | 3.98 |
|      | 1.28 |
|      | 3.58 |
|      | 5.02 |
|      | 4.16 |
|      | 3.34 |
|      | 3.71 |
|      | 6.40 |
|      | 2.33 |
|      | 4.64 |
|      | 1.56 |
|      | 2.81 |
|      | 5.19 |
|      | 5.17 |
|      | 3.88 |
|      | 3.85 |
|      | 2.66 |
|      | 5.70 |
|      | 3.14 |
|      | 2.47 |
|      | 2.42 |
|      | 1.28 |
|      | 4.45 |
|      | 1.23 |
|      | 2.12 |
|      | 1.08 |
|      | 1.79 |
|      | 2.14 |
|      | 3.85 |
|      | 3.17 |
|      | 2.25 |
|      | 1.41 |
|      | 5.68 |
|      | 5.54 |
|      | 2.79 |

2.22  
3.08  
3.06  
5.23  
3.01  
3.77  
1.44  
4.13  
1.49  
1.79  
2.76  
2.72  
2.99  
2.70  
3.53  
4.16  
3.59  
2.82  
4.72  
2.41  
3.42  
3.25  
2.82  
4.68  
2.28  
3.45  
5.81  
4.77  
3.68  
1.28  
1.80  
4.45  
2.78  
2.85  
2.20

3.32

2.80

4.08

2.50

| 313 °C |      |       |      | 304 °C |       |       |      | 291 °C |       |       |      |
|--------|------|-------|------|--------|-------|-------|------|--------|-------|-------|------|
| Count  | 1450 | 7852  | 0.19 | Count  | 3511  | 8043  | 0.44 | Count  | 5335  | 7564  | 0.71 |
| Fields | 25   | 25    | 0.00 | Fields | 25    | 25    | 0.01 | Fields | 25    | 25    | 0.01 |
| Mean   | 58.0 | 314.1 | 5.39 | Mean   | 140.4 | 321.7 | 2.29 | Mean   | 213.4 | 302.6 | 1.42 |
| Error  | 1.52 | 6.27  | 0.14 | Error  | 2.08  | 3.27  | 0.03 | Error  | 3.18  | 3.58  | 0.02 |
| S.Dev  | 7.61 | 31.4  | 0.18 | S.Dev  | 10.4  | 16.4  | 0.44 | S.Dev  | 15.9  | 17.9  | 0.71 |
| P.Dev  | 7.62 | 17.7  | 0.01 | P.Dev  | 11.9  | 17.9  | 0.01 | P.Dev  | 14.6  | 17.4  | 0.01 |
| S/P.D  | 1.00 | 1.77  |      | S/P.D  | 0.88  | 0.91  |      | S/P.D  | 1.09  | 1.03  |      |

| Field | TL | RL  | RL/TL | Field | TL  | RL  | RL/TL | Field | TL  | RL  | RL/TL |
|-------|----|-----|-------|-------|-----|-----|-------|-------|-----|-----|-------|
| 1     | 53 | 336 | 0.16  | 1     | 135 | 327 | 0.41  | 1     | 218 | 320 | 0.68  |
| 2     | 66 | 356 | 0.19  | 2     | 152 | 324 | 0.47  | 2     | 204 | 297 | 0.69  |
| 3     | 57 | 353 | 0.16  | 3     | 140 | 315 | 0.44  | 3     | 220 | 303 | 0.73  |
| 4     | 48 | 264 | 0.18  | 4     | 131 | 307 | 0.43  | 4     | 228 | 312 | 0.73  |
| 5     | 57 | 337 | 0.17  | 5     | 151 | 300 | 0.50  | 5     | 228 | 334 | 0.68  |
| 6     | 58 | 315 | 0.18  | 6     | 128 | 300 | 0.43  | 6     | 220 | 295 | 0.75  |
| 7     | 49 | 313 | 0.16  | 7     | 147 | 325 | 0.45  | 7     | 203 | 300 | 0.68  |
| 8     | 57 | 245 | 0.23  | 8     | 130 | 313 | 0.42  | 8     | 205 | 301 | 0.68  |
| 9     | 51 | 343 | 0.15  | 9     | 153 | 316 | 0.48  | 9     | 202 | 314 | 0.64  |
| 10    | 65 | 336 | 0.19  | 10    | 131 | 324 | 0.40  | 10    | 191 | 298 | 0.64  |
| 11    | 53 | 304 | 0.17  | 11    | 133 | 319 | 0.42  | 11    | 232 | 333 | 0.70  |
| 12    | 52 | 316 | 0.16  | 12    | 153 | 350 | 0.44  | 12    | 199 | 265 | 0.75  |
| 13    | 61 | 304 | 0.20  | 13    | 126 | 325 | 0.39  | 13    | 234 | 316 | 0.74  |
| 14    | 60 | 325 | 0.18  | 14    | 147 | 336 | 0.44  | 14    | 203 | 291 | 0.70  |
| 15    | 75 | 353 | 0.21  | 15    | 158 | 361 | 0.44  | 15    | 246 | 306 | 0.80  |
| 16    | 63 | 317 | 0.20  | 16    | 144 | 329 | 0.44  | 16    | 223 | 328 | 0.68  |
| 17    | 60 | 317 | 0.19  | 17    | 131 | 318 | 0.41  | 17    | 222 | 290 | 0.77  |
| 18    | 45 | 302 | 0.15  | 18    | 162 | 359 | 0.45  | 18    | 212 | 286 | 0.74  |
| 19    | 56 | 310 | 0.18  | 19    | 144 | 296 | 0.49  | 19    | 203 | 287 | 0.71  |
| 20    | 75 | 366 | 0.20  | 20    | 136 | 312 | 0.44  | 20    | 222 | 303 | 0.73  |
| 21    | 55 | 332 | 0.17  | 21    | 126 | 325 | 0.39  | 21    | 209 | 293 | 0.71  |
| 22    | 57 | 276 | 0.21  | 22    | 145 | 315 | 0.46  | 22    | 179 | 267 | 0.67  |
| 23    | 49 | 271 | 0.18  | 23    | 135 | 309 | 0.44  | 23    | 232 | 317 | 0.73  |
| 24    | 63 | 289 | 0.22  | 24    | 135 | 314 | 0.43  | 24    | 189 | 288 | 0.66  |
| 25    | 65 | 272 | 0.24  | 25    | 138 | 324 | 0.43  | 25    | 211 | 320 | 0.66  |

| 271 °C |       |       |      | 231 °C |       |       |      | 183 °C |       |       |      |
|--------|-------|-------|------|--------|-------|-------|------|--------|-------|-------|------|
| Count  | 7882  | 8937  | 0.88 | Count  | 7319  | 8128  | 0.90 | Count  | 8840  | 9610  | 0.92 |
| Fields | 25    | 25    | 0.01 | Fields | 25    | 25    | 0.00 | Fields | 25    | 25    | 0.00 |
| Mean   | 315.3 | 357.5 | 1.13 | Mean   | 292.8 | 325.1 | 1.11 | Mean   | 353.6 | 384.4 | 1.09 |
| Error  | 3.96  | 4.07  | 0.01 | Error  | 2.75  | 3.60  | 0.00 | Error  | 3.97  | 4.06  | 0.01 |
| S.Dev  | 19.8  | 20.4  | 0.88 | S.Dev  | 13.7  | 18.0  | 0.90 | S.Dev  | 19.8  | 20.3  | 0.92 |
| P.Dev  | 17.8  | 18.9  | 0.01 | P.Dev  | 17.1  | 18.0  | 0.01 | P.Dev  | 18.8  | 19.6  | 0.01 |
| S/P.D  | 1.11  | 1.08  |      | S/P.D  | 0.80  | 1.00  |      | S/P.D  | 1.05  | 1.04  |      |

| Field | TL  | RL  | RL/TL | Field | TL  | RL  | RL/TL | Field | TL  | RL  | RL/TL |
|-------|-----|-----|-------|-------|-----|-----|-------|-------|-----|-----|-------|
| 1     | 292 | 372 | 0.78  | 1     | 286 | 319 | 0.90  | 1     | 326 | 367 | 0.89  |
| 2     | 310 | 357 | 0.87  | 2     | 298 | 337 | 0.88  | 2     | 359 | 410 | 0.88  |
| 3     | 301 | 356 | 0.85  | 3     | 291 | 328 | 0.89  | 3     | 357 | 394 | 0.91  |
| 4     | 360 | 402 | 0.90  | 4     | 263 | 296 | 0.89  | 4     | 319 | 347 | 0.92  |
| 5     | 340 | 387 | 0.88  | 5     | 293 | 330 | 0.89  | 5     | 340 | 389 | 0.87  |
| 6     | 297 | 336 | 0.88  | 6     | 308 | 348 | 0.89  | 6     | 357 | 385 | 0.93  |
| 7     | 309 | 350 | 0.88  | 7     | 276 | 302 | 0.91  | 7     | 359 | 377 | 0.95  |
| 8     | 339 | 383 | 0.89  | 8     | 296 | 345 | 0.86  | 8     | 367 | 411 | 0.89  |
| 9     | 316 | 352 | 0.90  | 9     | 272 | 296 | 0.92  | 9     | 348 | 379 | 0.92  |
| 10    | 303 | 341 | 0.89  | 10    | 298 | 325 | 0.92  | 10    | 384 | 407 | 0.94  |
| 11    | 309 | 351 | 0.88  | 11    | 304 | 332 | 0.92  | 11    | 377 | 417 | 0.90  |
| 12    | 302 | 340 | 0.89  | 12    | 296 | 337 | 0.88  | 12    | 333 | 362 | 0.92  |
| 13    | 322 | 356 | 0.90  | 13    | 284 | 314 | 0.90  | 13    | 349 | 379 | 0.92  |
| 14    | 310 | 330 | 0.94  | 14    | 310 | 336 | 0.92  | 14    | 345 | 383 | 0.90  |
| 15    | 303 | 330 | 0.92  | 15    | 283 | 313 | 0.90  | 15    | 363 | 389 | 0.93  |
| 16    | 300 | 360 | 0.83  | 16    | 283 | 309 | 0.92  | 16    | 353 | 371 | 0.95  |
| 17    | 316 | 364 | 0.87  | 17    | 288 | 323 | 0.89  | 17    | 378 | 400 | 0.95  |
| 18    | 314 | 372 | 0.84  | 18    | 276 | 292 | 0.95  | 18    | 345 | 378 | 0.91  |
| 19    | 291 | 344 | 0.85  | 19    | 310 | 340 | 0.91  | 19    | 357 | 382 | 0.93  |
| 20    | 312 | 359 | 0.87  | 20    | 285 | 316 | 0.90  | 20    | 343 | 376 | 0.91  |
| 21    | 284 | 316 | 0.90  | 21    | 310 | 332 | 0.93  | 21    | 336 | 361 | 0.93  |
| 22    | 357 | 379 | 0.94  | 22    | 322 | 369 | 0.87  | 22    | 319 | 345 | 0.92  |
| 23    | 323 | 346 | 0.93  | 23    | 297 | 337 | 0.88  | 23    | 351 | 383 | 0.92  |
| 24    | 335 | 373 | 0.90  | 24    | 290 | 321 | 0.90  | 24    | 375 | 391 | 0.96  |
| 25    | 337 | 381 | 0.88  | 25    | 300 | 331 | 0.91  | 25    | 400 | 427 | 0.94  |

| Unann  |       |       |       | STD 21-3 |       |       |       | STD 21-1 |       |       |       |
|--------|-------|-------|-------|----------|-------|-------|-------|----------|-------|-------|-------|
| Count  | 9162  | 9828  | 0.93  | Count    | 7672  | 8337  | 0.92  | Count    | 8086  | 9641  | 0.84  |
| Fields | 25    | 25    | 0.00  | Fields   | 25    | 25    | 0.00  | Fields   | 25    | 25    | 0.01  |
| Mean   | 366.5 | 393.1 | 1.07  | Mean     | 306.9 | 333.5 | 1.09  | Mean     | 323.4 | 385.6 | 1.19  |
| Error  | 3.36  | 3.23  | 0.00  | Error    | 2.60  | 3.46  | 0.01  | Error    | 4.38  | 5.28  | 0.01  |
| S.Dev  | 16.8  | 16.1  | 0.93  | S.Dev    | 13.0  | 17.3  | 0.92  | S.Dev    | 21.9  | 26.4  | 0.84  |
| P.Dev  | 19.1  | 19.8  | 0.01  | P.Dev    | 17.5  | 18.3  | 0.01  | P.Dev    | 18.0  | 19.6  | 0.01  |
| S/P.D  | 0.88  | 0.81  |       | S/P.D    | 0.74  | 0.95  |       | S/P.D    | 1.22  | 1.34  |       |
| Field  | TL    | RL    | RL/TL | Field    | TL    | RL    | RL/TL | Field    | TL    | RL    | RL/TL |
| 1      | 348   | 370   | 0.94  | 1        | 318   | 339   | 0.94  | 1        | 358   | 432   | 0.83  |
| 2      | 339   | 373   | 0.91  | 2        | 321   | 350   | 0.92  | 2        | 305   | 373   | 0.82  |
| 3      | 370   | 404   | 0.92  | 3        | 289   | 317   | 0.91  | 3        | 288   | 342   | 0.84  |
| 4      | 343   | 365   | 0.94  | 4        | 310   | 341   | 0.91  | 4        | 304   | 343   | 0.89  |
| 5      | 375   | 406   | 0.92  | 5        | 288   | 310   | 0.93  | 5        | 316   | 362   | 0.87  |
| 6      | 353   | 392   | 0.90  | 6        | 306   | 334   | 0.92  | 6        | 321   | 383   | 0.84  |
| 7      | 380   | 412   | 0.92  | 7        | 302   | 321   | 0.94  | 7        | 309   | 371   | 0.83  |
| 8      | 368   | 391   | 0.94  | 8        | 318   | 340   | 0.94  | 8        | 305   | 384   | 0.79  |
| 9      | 352   | 398   | 0.88  | 9        | 297   | 325   | 0.91  | 9        | 310   | 390   | 0.79  |
| 10     | 361   | 383   | 0.94  | 10       | 315   | 352   | 0.89  | 10       | 300   | 362   | 0.83  |
| 11     | 383   | 396   | 0.97  | 11       | 298   | 313   | 0.95  | 11       | 354   | 421   | 0.84  |
| 12     | 384   | 413   | 0.93  | 12       | 295   | 321   | 0.92  | 12       | 334   | 392   | 0.85  |
| 13     | 372   | 392   | 0.95  | 13       | 283   | 312   | 0.91  | 13       | 298   | 377   | 0.79  |
| 14     | 385   | 408   | 0.94  | 14       | 345   | 386   | 0.89  | 14       | 345   | 402   | 0.86  |
| 15     | 379   | 415   | 0.91  | 15       | 303   | 312   | 0.97  | 15       | 313   | 385   | 0.81  |
| 16     | 378   | 401   | 0.94  | 16       | 317   | 344   | 0.92  | 16       | 353   | 434   | 0.81  |
| 17     | 397   | 418   | 0.95  | 17       | 300   | 336   | 0.89  | 17       | 335   | 413   | 0.81  |
| 18     | 369   | 402   | 0.92  | 18       | 305   | 338   | 0.90  | 18       | 340   | 403   | 0.84  |
| 19     | 364   | 376   | 0.97  | 19       | 320   | 339   | 0.94  | 19       | 363   | 431   | 0.84  |
| 20     | 367   | 394   | 0.93  | 20       | 304   | 333   | 0.91  | 20       | 321   | 361   | 0.89  |
| 21     | 374   | 391   | 0.96  | 21       | 309   | 340   | 0.91  | 21       | 339   | 383   | 0.89  |
| 22     | 380   | 406   | 0.94  | 22       | 298   | 309   | 0.96  | 22       | 330   | 395   | 0.84  |
| 23     | 368   | 388   | 0.95  | 23       | 315   | 341   | 0.92  | 23       | 308   | 361   | 0.85  |
| 24     | 326   | 363   | 0.90  | 24       | 307   | 334   | 0.92  | 24       | 293   | 355   | 0.83  |
| 25     | 347   | 371   | 0.94  | 25       | 309   | 350   | 0.88  | 25       | 344   | 386   | 0.89  |

## STD 21-4

|        |       |       |      |
|--------|-------|-------|------|
| Count  | 9117  | 9570  | 0.95 |
| Fields | 25    | 25    | 0.00 |
| Mean   | 364.7 | 382.8 | 1.05 |
| Error  | 3.67  | 3.73  | 0.00 |
| S.Dev  | 18.4  | 18.7  | 0.95 |
| P.Dev  | 19.1  | 19.6  | 0.01 |
| S/P.D  | 0.96  | 0.95  |      |

## STD 21-2

|        |       |       |      |
|--------|-------|-------|------|
| Count  | 11418 | 11780 | 0.97 |
| Fields | 25    | 25    | 0.00 |
| Mean   | 456.7 | 471.2 | 1.03 |
| Error  | 10.81 | 10.50 | 0.00 |
| S.Dev  | 54.1  | 52.5  | 0.97 |
| P.Dev  | 21.4  | 21.7  | 0.01 |
| S/P.D  | 2.53  | 2.42  |      |

| Field | TL  | RL  | RL/TL |
|-------|-----|-----|-------|
| 1     | 334 | 359 | 0.93  |
| 2     | 358 | 375 | 0.95  |
| 3     | 388 | 410 | 0.95  |
| 4     | 378 | 399 | 0.95  |
| 5     | 336 | 361 | 0.93  |
| 6     | 351 | 359 | 0.98  |
| 7     | 343 | 356 | 0.96  |
| 8     | 375 | 390 | 0.96  |
| 9     | 385 | 406 | 0.95  |
| 10    | 377 | 401 | 0.94  |
| 11    | 366 | 384 | 0.95  |
| 12    | 377 | 402 | 0.94  |
| 13    | 365 | 376 | 0.97  |
| 14    | 349 | 376 | 0.93  |
| 15    | 401 | 422 | 0.95  |
| 16    | 365 | 372 | 0.98  |
| 17    | 373 | 386 | 0.97  |
| 18    | 373 | 386 | 0.97  |
| 19    | 362 | 382 | 0.95  |
| 20    | 378 | 394 | 0.96  |
| 21    | 349 | 371 | 0.94  |
| 22    | 376 | 387 | 0.97  |
| 23    | 358 | 368 | 0.97  |
| 24    | 376 | 399 | 0.94  |
| 25    | 324 | 349 | 0.93  |

| Field | TL  | RL  | RL/TL |
|-------|-----|-----|-------|
| 1     | 428 | 434 | 0.99  |
| 2     | 404 | 424 | 0.95  |
| 3     | 423 | 446 | 0.95  |
| 4     | 444 | 459 | 0.97  |
| 5     | 394 | 416 | 0.95  |
| 6     | 455 | 475 | 0.96  |
| 7     | 518 | 530 | 0.98  |
| 8     | 512 | 524 | 0.98  |
| 9     | 500 | 512 | 0.98  |
| 10    | 560 | 574 | 0.98  |
| 11    | 534 | 549 | 0.97  |
| 12    | 539 | 547 | 0.99  |
| 13    | 562 | 573 | 0.98  |
| 14    | 418 | 436 | 0.96  |
| 15    | 402 | 404 | 1.00  |
| 16    | 400 | 437 | 0.92  |
| 17    | 407 | 414 | 0.98  |
| 18    | 394 | 399 | 0.99  |
| 19    | 423 | 447 | 0.95  |
| 20    | 473 | 484 | 0.98  |
| 21    | 476 | 485 | 0.98  |
| 22    | 455 | 464 | 0.98  |
| 23    | 434 | 446 | 0.97  |
| 24    | 446 | 458 | 0.97  |
| 25    | 417 | 443 | 0.94  |

| 313 °C |      |      |       | 304 °C |      |      |       | 291 °C |      |      |       |
|--------|------|------|-------|--------|------|------|-------|--------|------|------|-------|
| Count  | 116  | 1703 | 0.07  | Count  | 974  | 2205 | 0.44  | Count  | 1573 | 1995 | 0.79  |
| Fields | 100  | 100  | 0.01  | Fields | 100  | 100  | 0.01  | Fields | 100  | 100  | 0.01  |
| Mean   | 1.2  | 17.0 | 14.5  | Mean   | 9.7  | 22.1 | 2.28  | Mean   | 15.7 | 20.0 | 1.27  |
| Error  | 0.1  | 0.4  | 1.40  | Error  | 0.32 | 0.50 | 0.05  | Error  | 0.41 | 0.43 | 0.02  |
| S.Dev  | 1.1  | 4.3  | 0.07  | S.Dev  | 3.2  | 5.0  | 0.44  | S.Dev  | 4.1  | 4.3  | 0.79  |
| P.Dev  | 1.1  | 4.1  | 0.01  | P.Dev  | 3.1  | 4.7  | 0.02  | P.Dev  | 4.0  | 4.5  | 0.03  |
| S/P.D  | 1.00 | 1.03 |       | S/P.D  | 1.02 | 1.06 |       | S/P.D  | 1.04 | 0.97 |       |
| Field  | TL   | RL   | RL/TL | Field  | TL   | RL   | RL/TL | Field  | TL   | RL   | RL/TL |
| 1      | 0    | 23   | 0.00  | 1      | 6    | 19   | 0.32  | 1      | 15   | 17   | 0.88  |
| 2      | 2    | 15   | 0.13  | 2      | 10   | 30   | 0.33  | 2      | 15   | 17   | 0.88  |
| 3      | 1    | 29   | 0.03  | 3      | 13   | 27   | 0.48  | 3      | 19   | 26   | 0.73  |
| 4      | 2    | 16   | 0.13  | 4      | 8    | 23   | 0.35  | 4      | 20   | 24   | 0.83  |
| 5      | 0    | 9    | 0.00  | 5      | 6    | 17   | 0.35  | 5      | 15   | 19   | 0.79  |
| 6      | 4    | 18   | 0.22  | 6      | 12   | 23   | 0.52  | 6      | 17   | 21   | 0.81  |
| 7      | 0    | 19   | 0.00  | 7      | 11   | 23   | 0.48  | 7      | 17   | 22   | 0.77  |
| 8      | 4    | 16   | 0.25  | 8      | 11   | 25   | 0.44  | 8      | 14   | 16   | 0.88  |
| 9      | 0    | 14   | 0.00  | 9      | 10   | 23   | 0.43  | 9      | 20   | 23   | 0.87  |
| 10     | 1    | 20   | 0.05  | 10     | 9    | 16   | 0.56  | 10     | 19   | 24   | 0.79  |
| 11     | 0    | 14   | 0.00  | 11     | 8    | 21   | 0.38  | 11     | 13   | 15   | 0.87  |
| 12     | 1    | 21   | 0.05  | 12     | 4    | 12   | 0.33  | 12     | 19   | 21   | 0.90  |
| 13     | 1    | 10   | 0.10  | 13     | 8    | 18   | 0.44  | 13     | 11   | 15   | 0.73  |
| 14     | 3    | 16   | 0.19  | 14     | 4    | 12   | 0.33  | 14     | 13   | 14   | 0.93  |
| 15     | 1    | 18   | 0.06  | 15     | 6    | 18   | 0.33  | 15     | 11   | 21   | 0.52  |
| 16     | 0    | 14   | 0.00  | 16     | 10   | 20   | 0.50  | 16     | 15   | 17   | 0.88  |
| 17     | 1    | 21   | 0.05  | 17     | 9    | 18   | 0.50  | 17     | 22   | 25   | 0.88  |
| 18     | 1    | 22   | 0.05  | 18     | 5    | 15   | 0.33  | 18     | 14   | 18   | 0.78  |
| 19     | 3    | 19   | 0.16  | 19     | 4    | 15   | 0.27  | 19     | 15   | 21   | 0.71  |
| 20     | 0    | 16   | 0.00  | 20     | 9    | 17   | 0.53  | 20     | 12   | 20   | 0.60  |
| 21     | 0    | 18   | 0.00  | 21     | 13   | 31   | 0.42  | 21     | 14   | 17   | 0.82  |
| 22     | 1    | 11   | 0.09  | 22     | 11   | 29   | 0.38  | 22     | 17   | 21   | 0.81  |
| 23     | 2    | 25   | 0.08  | 23     | 7    | 17   | 0.41  | 23     | 13   | 15   | 0.87  |
| 24     | 0    | 18   | 0.00  | 24     | 10   | 21   | 0.48  | 24     | 15   | 19   | 0.79  |

|    |   |    |      |    |    |    |      |    |    |    |      |
|----|---|----|------|----|----|----|------|----|----|----|------|
| 25 | 0 | 15 | 0.00 | 25 | 7  | 19 | 0.37 | 25 | 22 | 26 | 0.85 |
| 26 | 1 | 16 | 0.06 | 26 | 10 | 17 | 0.59 | 26 | 9  | 13 | 0.69 |
| 27 | 0 | 17 | 0.00 | 27 | 6  | 21 | 0.29 | 27 | 16 | 22 | 0.73 |
| 28 | 0 | 12 | 0.00 | 28 | 8  | 16 | 0.50 | 28 | 13 | 18 | 0.72 |
| 29 | 1 | 10 | 0.10 | 29 | 13 | 25 | 0.52 | 29 | 10 | 13 | 0.77 |
| 30 | 4 | 16 | 0.25 | 30 | 8  | 24 | 0.33 | 30 | 20 | 25 | 0.80 |
| 31 | 0 | 15 | 0.00 | 31 | 7  | 16 | 0.44 | 31 | 19 | 23 | 0.83 |
| 32 | 2 | 17 | 0.12 | 32 | 9  | 24 | 0.38 | 32 | 12 | 20 | 0.60 |
| 33 | 3 | 20 | 0.15 | 33 | 9  | 25 | 0.36 | 33 | 17 | 21 | 0.81 |
| 34 | 1 | 18 | 0.06 | 34 | 10 | 25 | 0.40 | 34 | 13 | 17 | 0.76 |
| 35 | 2 | 21 | 0.10 | 35 | 9  | 23 | 0.39 | 35 | 20 | 21 | 0.95 |
| 36 | 2 | 20 | 0.10 | 36 | 9  | 20 | 0.45 | 36 | 14 | 18 | 0.78 |
| 37 | 1 | 13 | 0.08 | 37 | 12 | 29 | 0.41 | 37 | 14 | 19 | 0.74 |
| 38 | 1 | 15 | 0.07 | 38 | 4  | 17 | 0.24 | 38 | 19 | 25 | 0.76 |
| 39 | 2 | 21 | 0.10 | 39 | 12 | 20 | 0.60 | 39 | 18 | 24 | 0.75 |
| 40 | 0 | 10 | 0.00 | 40 | 5  | 19 | 0.26 | 40 | 18 | 20 | 0.90 |
| 41 | 1 | 19 | 0.05 | 41 | 6  | 14 | 0.43 | 41 | 18 | 21 | 0.86 |
| 42 | 0 | 12 | 0.00 | 42 | 4  | 10 | 0.40 | 42 | 15 | 21 | 0.71 |
| 43 | 2 | 20 | 0.10 | 43 | 12 | 21 | 0.57 | 43 | 20 | 24 | 0.83 |
| 44 | 2 | 11 | 0.18 | 44 | 8  | 20 | 0.40 | 44 | 24 | 29 | 0.83 |
| 45 | 0 | 18 | 0.00 | 45 | 10 | 25 | 0.40 | 45 | 13 | 23 | 0.57 |
| 46 | 1 | 24 | 0.04 | 46 | 4  | 17 | 0.24 | 46 | 17 | 20 | 0.85 |
| 47 | 1 | 15 | 0.07 | 47 | 12 | 21 | 0.57 | 47 | 10 | 15 | 0.67 |
| 48 | 3 | 25 | 0.12 | 48 | 8  | 19 | 0.42 | 48 | 18 | 22 | 0.82 |
| 49 | 0 | 17 | 0.00 | 49 | 10 | 21 | 0.48 | 49 | 14 | 17 | 0.82 |
| 50 | 1 | 26 | 0.04 | 50 | 7  | 19 | 0.37 | 50 | 13 | 18 | 0.72 |
| 51 | 1 | 18 | 0.06 | 51 | 10 | 23 | 0.43 | 51 | 10 | 11 | 0.91 |
| 52 | 2 | 17 | 0.12 | 52 | 12 | 27 | 0.44 | 52 | 13 | 18 | 0.72 |
| 53 | 1 | 17 | 0.06 | 53 | 10 | 23 | 0.43 | 53 | 10 | 16 | 0.63 |
| 54 | 0 | 12 | 0.00 | 54 | 6  | 24 | 0.25 | 54 | 8  | 10 | 0.80 |
| 55 | 1 | 24 | 0.04 | 55 | 9  | 21 | 0.43 | 55 | 10 | 16 | 0.63 |
| 56 | 2 | 18 | 0.11 | 56 | 10 | 19 | 0.53 | 56 | 26 | 30 | 0.87 |
| 57 | 3 | 19 | 0.16 | 57 | 8  | 23 | 0.35 | 57 | 14 | 17 | 0.82 |
| 58 | 2 | 17 | 0.12 | 58 | 8  | 20 | 0.40 | 58 | 10 | 13 | 0.77 |
| 59 | 0 | 18 | 0.00 | 59 | 7  | 21 | 0.33 | 59 | 14 | 21 | 0.67 |

|    |   |    |      |    |    |    |      |    |    |    |      |
|----|---|----|------|----|----|----|------|----|----|----|------|
| 60 | 0 | 24 | 0.00 | 60 | 11 | 23 | 0.48 | 60 | 17 | 22 | 0.77 |
| 61 | 2 | 12 | 0.17 | 61 | 16 | 30 | 0.53 | 61 | 14 | 20 | 0.70 |
| 62 | 0 | 20 | 0.00 | 62 | 14 | 24 | 0.58 | 62 | 15 | 16 | 0.94 |
| 63 | 3 | 18 | 0.17 | 63 | 12 | 21 | 0.57 | 63 | 13 | 16 | 0.81 |
| 64 | 0 | 16 | 0.00 | 64 | 8  | 18 | 0.44 | 64 | 12 | 14 | 0.86 |
| 65 | 1 | 11 | 0.09 | 65 | 14 | 22 | 0.64 | 65 | 21 | 25 | 0.84 |
| 66 | 2 | 14 | 0.14 | 66 | 6  | 21 | 0.29 | 66 | 17 | 20 | 0.85 |
| 67 | 3 | 19 | 0.16 | 67 | 11 | 23 | 0.48 | 67 | 22 | 27 | 0.81 |
| 68 | 1 | 22 | 0.05 | 68 | 9  | 18 | 0.50 | 68 | 22 | 26 | 0.85 |
| 69 | 3 | 18 | 0.17 | 69 | 2  | 10 | 0.20 | 69 | 18 | 24 | 0.75 |
| 70 | 1 | 21 | 0.05 | 70 | 5  | 30 | 0.17 | 70 | 15 | 18 | 0.83 |
| 71 | 2 | 17 | 0.12 | 71 | 10 | 22 | 0.45 | 71 | 11 | 16 | 0.69 |
| 72 | 1 | 16 | 0.06 | 72 | 11 | 17 | 0.65 | 72 | 16 | 16 | 1.00 |
| 73 | 0 | 16 | 0.00 | 73 | 9  | 27 | 0.33 | 73 | 8  | 14 | 0.57 |
| 74 | 1 | 19 | 0.05 | 74 | 11 | 27 | 0.41 | 74 | 22 | 29 | 0.76 |
| 75 | 0 | 13 | 0.00 | 75 | 13 | 25 | 0.52 | 75 | 24 | 28 | 0.86 |
| 76 | 1 | 11 | 0.09 | 76 | 12 | 22 | 0.55 | 76 | 19 | 20 | 0.95 |
| 77 | 3 | 19 | 0.16 | 77 | 15 | 28 | 0.54 | 77 | 16 | 20 | 0.80 |
| 78 | 0 | 13 | 0.00 | 78 | 12 | 25 | 0.48 | 78 | 16 | 21 | 0.76 |
| 79 | 0 | 15 | 0.00 | 79 | 13 | 26 | 0.50 | 79 | 12 | 16 | 0.75 |
| 80 | 0 | 12 | 0.00 | 80 | 10 | 21 | 0.48 | 80 | 15 | 22 | 0.68 |
| 81 | 2 | 18 | 0.11 | 81 | 9  | 18 | 0.50 | 81 | 20 | 24 | 0.83 |
| 82 | 2 | 17 | 0.12 | 82 | 10 | 27 | 0.37 | 82 | 15 | 21 | 0.71 |
| 83 | 2 | 16 | 0.13 | 83 | 12 | 24 | 0.50 | 83 | 14 | 19 | 0.74 |
| 84 | 2 | 26 | 0.08 | 84 | 12 | 21 | 0.57 | 84 | 14 | 19 | 0.74 |
| 85 | 0 | 10 | 0.00 | 85 | 11 | 16 | 0.69 | 85 | 18 | 22 | 0.82 |
| 86 | 2 | 19 | 0.11 | 86 | 9  | 20 | 0.45 | 86 | 13 | 17 | 0.76 |
| 87 | 1 | 11 | 0.09 | 87 | 14 | 26 | 0.54 | 87 | 17 | 19 | 0.89 |
| 88 | 1 | 14 | 0.07 | 88 | 8  | 21 | 0.38 | 88 | 20 | 20 | 1.00 |
| 89 | 1 | 17 | 0.06 | 89 | 13 | 30 | 0.43 | 89 | 7  | 14 | 0.50 |
| 90 | 0 | 12 | 0.00 | 90 | 10 | 25 | 0.40 | 90 | 13 | 23 | 0.57 |
| 91 | 2 | 7  | 0.29 | 91 | 12 | 30 | 0.40 | 91 | 8  | 14 | 0.57 |
| 92 | 1 | 19 | 0.05 | 92 | 14 | 25 | 0.56 | 92 | 16 | 21 | 0.76 |
| 93 | 0 | 13 | 0.00 | 93 | 14 | 26 | 0.54 | 93 | 10 | 13 | 0.77 |
| 94 | 0 | 23 | 0.00 | 94 | 10 | 21 | 0.48 | 94 | 20 | 24 | 0.83 |

|     |   |    |      |
|-----|---|----|------|
| 95  | 0 | 13 | 0.00 |
| 96  | 1 | 22 | 0.05 |
| 97  | 1 | 21 | 0.05 |
| 98  | 2 | 15 | 0.13 |
| 99  | 1 | 17 | 0.06 |
| 100 | 0 | 22 | 0.00 |

|     |    |    |      |
|-----|----|----|------|
| 95  | 11 | 24 | 0.46 |
| 96  | 20 | 36 | 0.56 |
| 97  | 12 | 23 | 0.52 |
| 98  | 17 | 31 | 0.55 |
| 99  | 16 | 31 | 0.52 |
| 100 | 13 | 32 | 0.41 |

|     |    |    |      |
|-----|----|----|------|
| 95  | 27 | 32 | 0.84 |
| 96  | 21 | 23 | 0.91 |
| 97  | 19 | 22 | 0.86 |
| 98  | 19 | 26 | 0.73 |
| 99  | 15 | 19 | 0.79 |
| 100 | 16 | 18 | 0.89 |

| 271 °C |      |      |       | 231 °C |      |      |       | 183 °C |      |      |       |
|--------|------|------|-------|--------|------|------|-------|--------|------|------|-------|
| Count  | 1989 | 2099 | 0.95  | Count  | 2251 | 2406 | 0.93  | Count  | 2227 | 2390 | 0.93  |
| Fields | 100  | 100  | 0.00  | Fields | 100  | 100  | 0.01  | Fields | 100  | 100  | 0.01  |
| Mean   | 19.9 | 21.0 | 1.06  | Mean   | 22.5 | 24.1 | 1.07  | Mean   | 22.3 | 23.9 | 1.07  |
| Error  | 0.43 | 0.44 | 0.01  | Error  | 0.51 | 0.51 | 0.01  | Error  | 0.48 | 0.50 | 0.01  |
| S.Dev  | 4.3  | 4.4  | 0.95  | S.Dev  | 5.1  | 5.1  | 0.94  | S.Dev  | 4.8  | 5.0  | 0.93  |
| P.Dev  | 4.5  | 4.6  | 0.03  | P.Dev  | 4.7  | 4.9  | 0.03  | P.Dev  | 4.7  | 4.9  | 0.03  |
| S/P.D  | 0.97 | 0.95 |       | S/P.D  | 1.07 | 1.04 |       | S/P.D  | 1.01 | 1.02 |       |
| Field  | TL   | RL   | RL/TL | Field  | TL   | RL   | RL/TL | Field  | TL   | RL   | RL/TL |
| 1      | 21   | 21   | 1.00  | 1      | 22   | 22   | 1.00  | 1      | 27   | 28   | 0.96  |
| 2      | 19   | 22   | 0.86  | 2      | 26   | 29   | 0.90  | 2      | 22   | 24   | 0.92  |
| 3      | 21   | 23   | 0.91  | 3      | 15   | 16   | 0.94  | 3      | 20   | 21   | 0.95  |
| 4      | 15   | 16   | 0.94  | 4      | 22   | 22   | 1.00  | 4      | 24   | 26   | 0.92  |
| 5      | 27   | 27   | 1.00  | 5      | 25   | 26   | 0.96  | 5      | 26   | 29   | 0.90  |
| 6      | 21   | 23   | 0.91  | 6      | 21   | 24   | 0.88  | 6      | 31   | 31   | 1.00  |
| 7      | 22   | 25   | 0.88  | 7      | 19   | 22   | 0.86  | 7      | 20   | 22   | 0.91  |
| 8      | 17   | 18   | 0.94  | 8      | 26   | 27   | 0.96  | 8      | 18   | 21   | 0.86  |
| 9      | 18   | 20   | 0.90  | 9      | 22   | 24   | 0.92  | 9      | 27   | 29   | 0.93  |
| 10     | 25   | 27   | 0.93  | 10     | 25   | 27   | 0.93  | 10     | 19   | 20   | 0.95  |
| 11     | 18   | 20   | 0.90  | 11     | 19   | 21   | 0.90  | 11     | 25   | 27   | 0.93  |
| 12     | 25   | 27   | 0.93  | 12     | 31   | 32   | 0.97  | 12     | 15   | 15   | 1.00  |
| 13     | 23   | 24   | 0.96  | 13     | 22   | 23   | 0.96  | 13     | 28   | 29   | 0.97  |
| 14     | 23   | 23   | 1.00  | 14     | 31   | 31   | 1.00  | 14     | 20   | 20   | 1.00  |
| 15     | 15   | 16   | 0.94  | 15     | 18   | 21   | 0.86  | 15     | 19   | 21   | 0.90  |
| 16     | 19   | 19   | 1.00  | 16     | 20   | 24   | 0.83  | 16     | 27   | 27   | 1.00  |
| 17     | 18   | 20   | 0.90  | 17     | 33   | 36   | 0.92  | 17     | 25   | 27   | 0.93  |
| 18     | 20   | 22   | 0.91  | 18     | 24   | 28   | 0.86  | 18     | 29   | 30   | 0.97  |
| 19     | 14   | 15   | 0.93  | 19     | 23   | 23   | 1.00  | 19     | 22   | 23   | 0.96  |
| 20     | 18   | 18   | 1.00  | 20     | 17   | 18   | 0.94  | 20     | 19   | 19   | 1.00  |
| 21     | 21   | 21   | 1.00  | 21     | 22   | 23   | 0.96  | 21     | 29   | 31   | 0.94  |
| 22     | 18   | 19   | 0.95  | 22     | 27   | 27   | 1.00  | 22     | 17   | 18   | 0.94  |
| 23     | 20   | 24   | 0.83  | 23     | 23   | 24   | 0.96  | 23     | 22   | 23   | 0.96  |
| 24     | 18   | 20   | 0.90  | 24     | 18   | 22   | 0.82  | 24     | 19   | 21   | 0.90  |

|    |    |    |      |    |    |    |      |    |    |    |      |
|----|----|----|------|----|----|----|------|----|----|----|------|
| 25 | 27 | 29 | 0.93 | 25 | 38 | 38 | 1.00 | 25 | 23 | 25 | 0.92 |
| 26 | 20 | 21 | 0.95 | 26 | 30 | 32 | 0.94 | 26 | 23 | 23 | 1.00 |
| 27 | 21 | 22 | 0.95 | 27 | 21 | 21 | 1.00 | 27 | 26 | 28 | 0.93 |
| 28 | 15 | 17 | 0.88 | 28 | 25 | 27 | 0.93 | 28 | 32 | 33 | 0.97 |
| 29 | 15 | 16 | 0.94 | 29 | 23 | 26 | 0.88 | 29 | 24 | 26 | 0.92 |
| 30 | 16 | 16 | 1.00 | 30 | 21 | 22 | 0.95 | 30 | 24 | 25 | 0.96 |
| 31 | 13 | 15 | 0.87 | 31 | 15 | 17 | 0.88 | 31 | 19 | 21 | 0.90 |
| 32 | 18 | 20 | 0.90 | 32 | 8  | 9  | 0.89 | 32 | 24 | 27 | 0.89 |
| 33 | 22 | 23 | 0.96 | 33 | 30 | 32 | 0.94 | 33 | 19 | 19 | 1.00 |
| 34 | 17 | 18 | 0.94 | 34 | 16 | 18 | 0.89 | 34 | 21 | 23 | 0.91 |
| 35 | 24 | 24 | 1.00 | 35 | 25 | 26 | 0.96 | 35 | 20 | 21 | 0.95 |
| 36 | 27 | 27 | 1.00 | 36 | 16 | 17 | 0.94 | 36 | 19 | 19 | 1.00 |
| 37 | 17 | 19 | 0.89 | 37 | 22 | 24 | 0.92 | 37 | 27 | 30 | 0.90 |
| 38 | 26 | 27 | 0.96 | 38 | 26 | 30 | 0.87 | 38 | 13 | 14 | 0.93 |
| 39 | 22 | 24 | 0.92 | 39 | 23 | 24 | 0.96 | 39 | 15 | 15 | 1.00 |
| 40 | 22 | 24 | 0.92 | 40 | 25 | 28 | 0.89 | 40 | 22 | 24 | 0.92 |
| 41 | 18 | 18 | 1.00 | 41 | 22 | 25 | 0.88 | 41 | 16 | 19 | 0.84 |
| 42 | 19 | 20 | 0.95 | 42 | 17 | 18 | 0.94 | 42 | 24 | 26 | 0.92 |
| 43 | 13 | 16 | 0.81 | 43 | 28 | 29 | 0.97 | 43 | 23 | 26 | 0.88 |
| 44 | 16 | 16 | 1.00 | 44 | 27 | 29 | 0.93 | 44 | 23 | 23 | 1.00 |
| 45 | 15 | 16 | 0.94 | 45 | 25 | 25 | 1.00 | 45 | 21 | 23 | 0.91 |
| 46 | 19 | 20 | 0.95 | 46 | 20 | 23 | 0.87 | 46 | 28 | 29 | 0.97 |
| 47 | 17 | 20 | 0.85 | 47 | 21 | 24 | 0.88 | 47 | 30 | 30 | 1.00 |
| 48 | 18 | 19 | 0.95 | 48 | 12 | 14 | 0.86 | 48 | 26 | 33 | 0.79 |
| 49 | 15 | 16 | 0.94 | 49 | 23 | 26 | 0.88 | 49 | 27 | 28 | 0.96 |
| 50 | 15 | 16 | 0.94 | 50 | 23 | 24 | 0.96 | 50 | 25 | 26 | 0.96 |
| 51 | 19 | 19 | 1.00 | 51 | 23 | 24 | 0.96 | 51 | 21 | 23 | 0.91 |
| 52 | 20 | 21 | 0.95 | 52 | 27 | 29 | 0.93 | 52 | 20 | 23 | 0.87 |
| 53 | 32 | 33 | 0.97 | 53 | 21 | 22 | 0.95 | 53 | 26 | 27 | 0.96 |
| 54 | 22 | 22 | 1.00 | 54 | 31 | 31 | 1.00 | 54 | 25 | 26 | 0.96 |
| 55 | 24 | 25 | 0.96 | 55 | 17 | 18 | 0.94 | 55 | 14 | 14 | 1.00 |
| 56 | 19 | 20 | 0.95 | 56 | 21 | 24 | 0.88 | 56 | 22 | 24 | 0.92 |
| 57 | 21 | 22 | 0.95 | 57 | 25 | 26 | 0.96 | 57 | 20 | 23 | 0.87 |
| 58 | 16 | 16 | 1.00 | 58 | 24 | 25 | 0.96 | 58 | 22 | 23 | 0.96 |
| 59 | 18 | 18 | 1.00 | 59 | 22 | 24 | 0.92 | 59 | 23 | 27 | 0.85 |

|    |    |    |      |    |    |    |      |    |    |    |      |
|----|----|----|------|----|----|----|------|----|----|----|------|
| 60 | 29 | 30 | 0.97 | 60 | 16 | 18 | 0.89 | 60 | 23 | 24 | 0.96 |
| 61 | 22 | 24 | 0.92 | 61 | 23 | 24 | 0.96 | 61 | 35 | 38 | 0.92 |
| 62 | 24 | 26 | 0.92 | 62 | 21 | 22 | 0.95 | 62 | 21 | 22 | 0.95 |
| 63 | 20 | 21 | 0.95 | 63 | 29 | 32 | 0.91 | 63 | 12 | 13 | 0.92 |
| 64 | 14 | 16 | 0.88 | 64 | 20 | 20 | 1.00 | 64 | 21 | 23 | 0.91 |
| 65 | 17 | 17 | 1.00 | 65 | 28 | 29 | 0.97 | 65 | 23 | 25 | 0.92 |
| 66 | 14 | 15 | 0.93 | 66 | 15 | 19 | 0.79 | 66 | 16 | 19 | 0.84 |
| 67 | 19 | 20 | 0.95 | 67 | 20 | 23 | 0.87 | 67 | 20 | 23 | 0.87 |
| 68 | 16 | 17 | 0.94 | 68 | 27 | 27 | 1.00 | 68 | 19 | 19 | 1.00 |
| 69 | 17 | 19 | 0.89 | 69 | 18 | 19 | 0.95 | 69 | 24 | 25 | 0.96 |
| 70 | 16 | 16 | 1.00 | 70 | 19 | 19 | 1.00 | 70 | 21 | 23 | 0.91 |
| 71 | 27 | 29 | 0.93 | 71 | 21 | 22 | 0.95 | 71 | 27 | 31 | 0.87 |
| 72 | 20 | 21 | 0.95 | 72 | 13 | 16 | 0.81 | 72 | 13 | 15 | 0.87 |
| 73 | 16 | 17 | 0.94 | 73 | 24 | 26 | 0.92 | 73 | 18 | 21 | 0.86 |
| 74 | 29 | 29 | 1.00 | 74 | 24 | 25 | 0.96 | 74 | 14 | 17 | 0.82 |
| 75 | 18 | 18 | 1.00 | 75 | 20 | 20 | 1.00 | 75 | 15 | 17 | 0.88 |
| 76 | 12 | 12 | 1.00 | 76 | 22 | 25 | 0.88 | 76 | 18 | 21 | 0.86 |
| 77 | 20 | 21 | 0.95 | 77 | 21 | 21 | 1.00 | 77 | 19 | 21 | 0.90 |
| 78 | 25 | 28 | 0.89 | 78 | 28 | 29 | 0.97 | 78 | 25 | 28 | 0.89 |
| 79 | 26 | 26 | 1.00 | 79 | 25 | 25 | 1.00 | 79 | 34 | 36 | 0.94 |
| 80 | 25 | 25 | 1.00 | 80 | 25 | 25 | 1.00 | 80 | 19 | 20 | 0.95 |
| 81 | 17 | 17 | 1.00 | 81 | 17 | 18 | 0.94 | 81 | 20 | 24 | 0.83 |
| 82 | 27 | 27 | 1.00 | 82 | 22 | 23 | 0.96 | 82 | 25 | 26 | 0.96 |
| 83 | 22 | 23 | 0.96 | 83 | 24 | 26 | 0.92 | 83 | 30 | 31 | 0.97 |
| 84 | 14 | 16 | 0.88 | 84 | 27 | 28 | 0.96 | 84 | 21 | 25 | 0.84 |
| 85 | 19 | 21 | 0.90 | 85 | 16 | 18 | 0.89 | 85 | 19 | 19 | 1.00 |
| 86 | 25 | 27 | 0.93 | 86 | 17 | 19 | 0.89 | 86 | 21 | 21 | 1.00 |
| 87 | 15 | 15 | 1.00 | 87 | 24 | 24 | 1.00 | 87 | 21 | 26 | 0.81 |
| 88 | 14 | 15 | 0.93 | 88 | 21 | 23 | 0.91 | 88 | 19 | 20 | 0.95 |
| 89 | 27 | 27 | 1.00 | 89 | 26 | 26 | 1.00 | 89 | 14 | 14 | 1.00 |
| 90 | 22 | 23 | 0.96 | 90 | 19 | 19 | 1.00 | 90 | 30 | 31 | 0.97 |
| 91 | 18 | 19 | 0.95 | 91 | 25 | 29 | 0.86 | 91 | 14 | 15 | 0.93 |
| 92 | 27 | 28 | 0.96 | 92 | 19 | 22 | 0.86 | 92 | 24 | 24 | 1.00 |
| 93 | 19 | 19 | 1.00 | 93 | 20 | 20 | 1.00 | 93 | 30 | 31 | 0.97 |
| 94 | 15 | 16 | 0.94 | 94 | 29 | 31 | 0.94 | 94 | 20 | 20 | 1.00 |

|     |    |    |      |
|-----|----|----|------|
| 95  | 19 | 19 | 1.00 |
| 96  | 19 | 20 | 0.95 |
| 97  | 18 | 18 | 1.00 |
| 98  | 30 | 30 | 1.00 |
| 99  | 21 | 22 | 0.95 |
| 100 | 21 | 25 | 0.84 |

|     |    |    |      |
|-----|----|----|------|
| 95  | 16 | 16 | 1.00 |
| 96  | 16 | 18 | 0.89 |
| 97  | 27 | 28 | 0.96 |
| 98  | 35 | 37 | 0.95 |
| 99  | 16 | 17 | 0.94 |
| 100 | 32 | 35 | 0.91 |

|     |    |    |      |
|-----|----|----|------|
| 95  | 20 | 22 | 0.91 |
| 96  | 22 | 23 | 0.96 |
| 97  | 25 | 27 | 0.93 |
| 98  | 24 | 26 | 0.92 |
| 99  | 29 | 31 | 0.94 |
| 100 | 25 | 25 | 1.00 |

|        |      |      |      |
|--------|------|------|------|
| Unann  |      |      |      |
| Count  | 2127 | 2268 | 0.94 |
| Fields | 100  | 100  | 0.01 |
| Mean   | 21.3 | 22.7 | 1.07 |
| Error  | 0.41 | 0.41 | 0.01 |
| S.Dev  | 4.1  | 4.1  | 0.94 |
| P.Dev  | 4.6  | 4.8  | 0.03 |
| S/P.D  | 0.88 | 0.87 |      |

| Field | TL | RL | RL/TL |
|-------|----|----|-------|
| 1     | 18 | 20 | 0.90  |
| 2     | 29 | 32 | 0.91  |
| 3     | 22 | 22 | 1.00  |
| 4     | 18 | 19 | 0.95  |
| 5     | 24 | 28 | 0.86  |
| 6     | 17 | 19 | 0.89  |
| 7     | 18 | 19 | 0.95  |
| 8     | 17 | 19 | 0.89  |
| 9     | 23 | 27 | 0.85  |
| 10    | 23 | 24 | 0.96  |
| 11    | 18 | 19 | 0.95  |
| 12    | 22 | 22 | 1.00  |
| 13    | 22 | 23 | 0.96  |
| 14    | 23 | 23 | 1.00  |
| 15    | 20 | 23 | 0.87  |
| 16    | 21 | 22 | 0.95  |
| 17    | 20 | 22 | 0.91  |
| 18    | 20 | 21 | 0.95  |
| 19    | 21 | 23 | 0.91  |
| 20    | 30 | 32 | 0.94  |
| 21    | 27 | 27 | 1.00  |
| 22    | 23 | 24 | 0.96  |
| 23    | 18 | 18 | 1.00  |
| 24    | 17 | 17 | 1.00  |

|    |    |    |      |
|----|----|----|------|
| 25 | 24 | 24 | 1.00 |
| 26 | 24 | 26 | 0.92 |
| 27 | 18 | 18 | 1.00 |
| 28 | 21 | 24 | 0.88 |
| 29 | 21 | 24 | 0.88 |
| 30 | 20 | 23 | 0.87 |
| 31 | 15 | 17 | 0.88 |
| 32 | 24 | 25 | 0.96 |
| 33 | 19 | 21 | 0.90 |
| 34 | 20 | 23 | 0.87 |
| 35 | 23 | 23 | 1.00 |
| 36 | 18 | 20 | 0.90 |
| 37 | 27 | 28 | 0.96 |
| 38 | 19 | 22 | 0.86 |
| 39 | 29 | 29 | 1.00 |
| 40 | 22 | 23 | 0.96 |
| 41 | 23 | 25 | 0.92 |
| 42 | 23 | 25 | 0.92 |
| 43 | 28 | 28 | 1.00 |
| 44 | 13 | 16 | 0.81 |
| 45 | 23 | 23 | 1.00 |
| 46 | 16 | 17 | 0.94 |
| 47 | 17 | 20 | 0.85 |
| 48 | 19 | 22 | 0.86 |
| 49 | 20 | 22 | 0.91 |
| 50 | 25 | 26 | 0.96 |
| 51 | 25 | 25 | 1.00 |
| 52 | 16 | 17 | 0.94 |
| 53 | 19 | 19 | 1.00 |
| 54 | 21 | 23 | 0.91 |
| 55 | 27 | 29 | 0.93 |
| 56 | 35 | 37 | 0.95 |
| 57 | 20 | 23 | 0.87 |
| 58 | 18 | 18 | 1.00 |
| 59 | 13 | 15 | 0.87 |

|    |    |    |      |
|----|----|----|------|
| 60 | 25 | 28 | 0.89 |
| 61 | 26 | 27 | 0.96 |
| 62 | 15 | 19 | 0.79 |
| 63 | 23 | 24 | 0.96 |
| 64 | 24 | 27 | 0.89 |
| 65 | 13 | 15 | 0.87 |
| 66 | 24 | 25 | 0.96 |
| 67 | 24 | 25 | 0.96 |
| 68 | 24 | 26 | 0.92 |
| 69 | 25 | 25 | 1.00 |
| 70 | 18 | 19 | 0.95 |
| 71 | 22 | 23 | 0.96 |
| 72 | 25 | 25 | 1.00 |
| 73 | 21 | 23 | 0.91 |
| 74 | 20 | 20 | 1.00 |
| 75 | 24 | 26 | 0.92 |
| 76 | 14 | 14 | 1.00 |
| 77 | 20 | 23 | 0.87 |
| 78 | 19 | 20 | 0.95 |
| 79 | 24 | 24 | 1.00 |
| 80 | 22 | 23 | 0.96 |
| 81 | 17 | 17 | 1.00 |
| 82 | 19 | 20 | 0.95 |
| 83 | 20 | 21 | 0.95 |
| 84 | 19 | 19 | 1.00 |
| 85 | 21 | 22 | 0.95 |
| 86 | 24 | 27 | 0.89 |
| 87 | 33 | 34 | 0.97 |
| 88 | 19 | 20 | 0.95 |
| 89 | 19 | 20 | 0.95 |
| 90 | 21 | 21 | 1.00 |
| 91 | 20 | 20 | 1.00 |
| 92 | 21 | 23 | 0.91 |
| 93 | 20 | 21 | 0.95 |
| 94 | 28 | 29 | 0.97 |

|     |    |    |      |
|-----|----|----|------|
| 95  | 17 | 18 | 0.94 |
| 96  | 22 | 23 | 0.96 |
| 97  | 24 | 25 | 0.96 |
| 98  | 21 | 26 | 0.81 |
| 99  | 14 | 16 | 0.88 |
| 100 | 20 | 20 | 1.00 |
